# Supplementary material for: Dissecting molecular network structures using a network subgraph approach
Source: PubMed Central journal article supplement (PMC7512139; doi:10.7717/peerj.9556), 2020-08-06
Supplement: peerj-08-9556-s005.pdf [file peerj-08-9556-s005.pdf]

| pattern id | SUM | 6 | 12 | 14 | 36 | 38 | 46 | 74 |
|------------|-----|---|----|----|----|----|----|----|
| 6          | 1   | 1 | 0  | 0  | 0  | 0  | 0  | 0  |
| 12         | 1   | 0 | 1  | 0  | 0  | 0  | 0  | 0  |
| 36         | 1   | 0 | 0  | 0  | 1  | 0  | 0  | 0  |
| 98         | 2   | 0 | 1  | 0  | 0  | 0  | 0  | 0  |
| 14         | 3   | 1 | 1  | 1  | 0  | 0  | 0  | 0  |
| 74         | 3   | 0 | 1  | 0  | 1  | 0  | 0  | 1  |
| 38         | 4   | 1 | 1  | 0  | 1  | 1  | 0  | 0  |
| 46         | 6   | 1 | 1  | 1  | 1  | 1  | 1  | 0  |
| 78         | 6   | 1 | 1  | 1  | 1  | 0  | 0  | 1  |
| 108        | 6   | 1 | 1  | 0  | 1  | 1  | 0  | 1  |
| 102        | 8   | 1 | 1  | 1  | 1  | 1  | 0  | 1  |
| 110        | 12  | 1 | 1  | 1  | 1  | 1  | 1  | 1  |
| 238        | 13  | 1 | 1  | 1  | 1  | 1  | 1  | 1  |

| 78 | 98 | 102 | 108 | 110 | 238 |
|----|----|-----|-----|-----|-----|
| 0  | 0  | 0   | 0   | 0   | 0   |
| 0  | 0  | 0   | 0   | 0   | 0   |
| 0  | 0  | 0   | 0   | 0   | 0   |
| 0  | 1  | 0   | 0   | 0   | 0   |
| 0  | 0  | 0   | 0   | 0   | 0   |
| 0  | 0  | 0   | 0   | 0   | 0   |
| 0  | 0  | 0   | 0   | 0   | 0   |
| 0  | 0  | 0   | 0   | 0   | 0   |
| 1  | 0  | 0   | 0   | 0   | 0   |
| 0  | 0  | 0   | 1   | 0   | 0   |
| 0  | 1  | 1   | 0   | 0   | 0   |
| 1  | 1  | 1   | 1   | 1   | 0   |
| 1  | 1  | 1   | 1   | 1   | 1   |
