# Supplementary material for: Dissecting molecular network structures using a network subgraph approach
Source: PubMed Central journal article supplement (PMC7512139; doi:10.7717/peerj.9556), 2020-08-06
Supplement: peerj-08-9556-s006.pdf [file peerj-08-9556-s006.pdf]

| pattern id | SUM | 6 | 12 | 14 | 36 | 38 | 46 | 74 |
|------------|-----|---|----|----|----|----|----|----|
| 14         | 1   | 1 | 0  | 0  | 0  | 0  | 0  | 0  |
| 328        | 1   | 0 | 1  | 0  | 0  | 0  | 0  | 0  |
| 2184       | 1   | 0 | 0  | 0  | 1  | 0  | 0  | 0  |
| 4740       | 1   | 0 | 1  | 0  | 0  | 0  | 0  | 0  |
| 28         | 2   | 1 | 1  | 0  | 0  | 0  | 0  | 0  |
| 74         | 2   | 1 | 1  | 0  | 0  | 0  | 0  | 0  |
| 76         | 2   | 1 | 0  | 0  | 1  | 0  | 0  | 0  |
| 204        | 2   | 1 | 0  | 0  | 1  | 0  | 0  | 0  |
| 280        | 2   | 0 | 1  | 0  | 1  | 0  | 0  | 0  |
| 392        | 2   | 0 | 1  | 0  | 1  | 0  | 0  | 0  |
| 30         | 3   | 1 | 1  | 1  | 0  | 0  | 0  | 0  |
| 90         | 3   | 1 | 1  | 1  | 0  | 0  | 0  | 0  |
| 330        | 3   | 1 | 1  | 0  | 0  | 0  | 0  | 0  |
| 390        | 3   | 1 | 1  | 1  | 0  | 0  | 0  | 0  |
| 456        | 3   | 1 | 1  | 0  | 1  | 0  | 0  | 0  |
| 904        | 3   | 1 | 1  | 0  | 1  | 0  | 0  | 0  |
| 4370       | 3   | 0 | 1  | 0  | 1  | 0  | 0  | 1  |
| 4418       | 3   | 0 | 1  | 0  | 1  | 0  | 0  | 0  |
| 4420       | 3   | 0 | 1  | 0  | 1  | 0  | 0  | 1  |
| 4424       | 3   | 0 | 1  | 0  | 1  | 0  | 0  | 1  |
| 78         | 4   | 1 | 1  | 0  | 1  | 1  | 0  | 0  |
| 92         | 4   | 1 | 1  | 0  | 1  | 1  | 0  | 0  |
| 206        | 4   | 1 | 1  | 0  | 1  | 1  | 0  | 0  |
| 344        | 4   | 1 | 1  | 0  | 1  | 1  | 0  | 0  |
| 394        | 4   | 1 | 1  | 0  | 1  | 1  | 0  | 0  |
| 396        | 4   | 1 | 1  | 1  | 1  | 0  | 0  | 0  |
| 404        | 4   | 1 | 1  | 0  | 1  | 0  | 0  | 1  |
| 408        | 4   | 1 | 1  | 0  | 1  | 1  | 0  | 0  |
| 472        | 4   | 1 | 1  | 0  | 1  | 1  | 0  | 0  |
| 906        | 4   | 1 | 1  | 0  | 1  | 1  | 0  | 0  |
| 908        | 4   | 1 | 1  | 1  | 1  | 0  | 0  | 0  |
| 2186       | 4   | 1 | 1  | 0  | 1  | 1  | 0  | 0  |
| 2190       | 4   | 1 | 1  | 0  | 1  | 1  | 0  | 0  |
| 2204       | 4   | 1 | 1  | 0  | 1  | 1  | 0  | 0  |
| 2252       | 4   | 1 | 1  | 0  | 1  | 1  | 0  | 0  |
| 2254       | 4   | 1 | 1  | 0  | 1  | 1  | 0  | 0  |
| 4546       | 4   | 1 | 1  | 0  | 1  | 0  | 0  | 0  |
| 4548       | 4   | 1 | 1  | 0  | 1  | 0  | 0  | 1  |
| 282        | 5   | 1 | 1  | 1  | 1  | 0  | 0  | 1  |
| 332        | 5   | 1 | 1  | 1  | 1  | 0  | 0  | 1  |
| 398        | 5   | 1 | 1  | 1  | 1  | 1  | 0  | 0  |
| 458        | 5   | 1 | 1  | 0  | 1  | 1  | 0  | 0  |
| 460        | 5   | 1 | 1  | 1  | 1  | 0  | 0  | 1  |
| 2506       | 5   | 1 | 1  | 0  | 1  | 1  | 0  | 0  |

|       |   |   |   |   |   |   |   |   |
|-------|---|---|---|---|---|---|---|---|
| 4440  | 5 | 1 | 1 | 0 | 1 | 1 | 0 | 1 |
| 4682  | 5 | 1 | 1 | 1 | 1 | 0 | 0 | 1 |
| 4742  | 5 | 1 | 1 | 0 | 1 | 1 | 0 | 0 |
| 4748  | 5 | 1 | 1 | 1 | 1 | 0 | 0 | 1 |
| 4812  | 5 | 1 | 1 | 1 | 1 | 0 | 0 | 1 |
| 4994  | 5 | 1 | 1 | 0 | 1 | 1 | 0 | 0 |
| 5064  | 5 | 1 | 1 | 1 | 1 | 0 | 0 | 1 |
| 6342  | 5 | 1 | 1 | 0 | 1 | 1 | 0 | 0 |
| 6356  | 5 | 1 | 1 | 0 | 1 | 1 | 0 | 0 |
| 94    | 6 | 1 | 1 | 1 | 1 | 1 | 1 | 0 |
| 222   | 6 | 1 | 1 | 1 | 1 | 1 | 1 | 0 |
| 286   | 6 | 1 | 1 | 1 | 1 | 0 | 0 | 1 |
| 406   | 6 | 1 | 1 | 1 | 1 | 0 | 0 | 1 |
| 412   | 6 | 1 | 1 | 1 | 1 | 1 | 0 | 1 |
| 468   | 6 | 1 | 1 | 0 | 1 | 1 | 0 | 1 |
| 856   | 6 | 1 | 1 | 1 | 1 | 1 | 1 | 0 |
| 910   | 6 | 1 | 1 | 1 | 1 | 1 | 1 | 0 |
| 972   | 6 | 1 | 1 | 1 | 1 | 0 | 0 | 1 |
| 2202  | 6 | 1 | 1 | 1 | 1 | 1 | 1 | 0 |
| 2206  | 6 | 1 | 1 | 1 | 1 | 1 | 1 | 0 |
| 2270  | 6 | 1 | 1 | 1 | 1 | 1 | 1 | 0 |
| 4374  | 6 | 1 | 1 | 1 | 1 | 0 | 0 | 1 |
| 4382  | 6 | 1 | 1 | 1 | 1 | 0 | 0 | 1 |
| 4426  | 6 | 1 | 1 | 1 | 1 | 0 | 0 | 1 |
| 4428  | 6 | 1 | 1 | 1 | 1 | 0 | 0 | 1 |
| 4436  | 6 | 1 | 1 | 0 | 1 | 1 | 0 | 1 |
| 4556  | 6 | 1 | 1 | 1 | 1 | 0 | 0 | 1 |
| 4564  | 6 | 1 | 1 | 0 | 1 | 1 | 0 | 1 |
| 4678  | 6 | 1 | 1 | 0 | 1 | 1 | 0 | 1 |
| 4698  | 6 | 1 | 1 | 1 | 1 | 0 | 0 | 1 |
| 5004  | 6 | 1 | 1 | 1 | 1 | 0 | 0 | 1 |
| 5016  | 6 | 1 | 1 | 0 | 1 | 1 | 0 | 1 |
| 5068  | 6 | 1 | 1 | 1 | 1 | 0 | 0 | 1 |
| 6552  | 6 | 1 | 1 | 0 | 1 | 1 | 0 | 1 |
| 6616  | 6 | 1 | 1 | 0 | 1 | 1 | 0 | 1 |
| 13260 | 6 | 1 | 1 | 1 | 1 | 0 | 0 | 1 |
| 348   | 7 | 1 | 1 | 1 | 1 | 1 | 0 | 1 |
| 410   | 7 | 1 | 1 | 1 | 1 | 1 | 1 | 1 |
| 476   | 7 | 1 | 1 | 1 | 1 | 1 | 0 | 1 |
| 2458  | 7 | 1 | 1 | 1 | 1 | 1 | 1 | 1 |
| 4686  | 7 | 1 | 1 | 1 | 1 | 1 | 0 | 1 |
| 4952  | 7 | 1 | 1 | 1 | 1 | 1 | 1 | 1 |
| 334   | 8 | 1 | 1 | 1 | 1 | 1 | 0 | 1 |
| 346   | 8 | 1 | 1 | 1 | 1 | 1 | 0 | 1 |
| 414   | 8 | 1 | 1 | 1 | 1 | 1 | 1 | 1 |

|       |    |   |   |   |   |   |   |   |
|-------|----|---|---|---|---|---|---|---|
| 454   | 8  | 1 | 1 | 1 | 1 | 1 | 0 | 1 |
| 462   | 8  | 1 | 1 | 1 | 1 | 1 | 0 | 1 |
| 922   | 8  | 1 | 1 | 1 | 1 | 1 | 1 | 1 |
| 924   | 8  | 1 | 1 | 1 | 1 | 1 | 0 | 1 |
| 2462  | 8  | 1 | 1 | 1 | 1 | 1 | 1 | 1 |
| 2524  | 8  | 1 | 1 | 1 | 1 | 1 | 1 | 1 |
| 4422  | 8  | 1 | 1 | 1 | 1 | 1 | 0 | 1 |
| 4434  | 8  | 1 | 1 | 1 | 1 | 1 | 0 | 1 |
| 4444  | 8  | 1 | 1 | 1 | 1 | 1 | 0 | 1 |
| 4550  | 8  | 1 | 1 | 1 | 1 | 1 | 0 | 1 |
| 4562  | 8  | 1 | 1 | 1 | 1 | 1 | 0 | 1 |
| 4572  | 8  | 1 | 1 | 1 | 1 | 1 | 0 | 1 |
| 4692  | 8  | 1 | 1 | 1 | 1 | 1 | 0 | 1 |
| 4700  | 8  | 1 | 1 | 1 | 1 | 1 | 0 | 1 |
| 4750  | 8  | 1 | 1 | 1 | 1 | 1 | 0 | 1 |
| 4758  | 8  | 1 | 1 | 1 | 1 | 1 | 0 | 1 |
| 4764  | 8  | 1 | 1 | 1 | 1 | 1 | 0 | 1 |
| 4998  | 8  | 1 | 1 | 1 | 1 | 1 | 1 | 1 |
| 5002  | 8  | 1 | 1 | 1 | 1 | 1 | 0 | 1 |
| 5012  | 8  | 1 | 1 | 1 | 1 | 1 | 0 | 1 |
| 5058  | 8  | 1 | 1 | 1 | 1 | 1 | 0 | 1 |
| 5066  | 8  | 1 | 1 | 1 | 1 | 1 | 0 | 1 |
| 5080  | 8  | 1 | 1 | 1 | 1 | 1 | 1 | 1 |
| 6348  | 8  | 1 | 1 | 1 | 1 | 1 | 0 | 1 |
| 6350  | 8  | 1 | 1 | 1 | 1 | 1 | 0 | 1 |
| 6598  | 8  | 1 | 1 | 1 | 1 | 1 | 0 | 1 |
| 7128  | 8  | 1 | 1 | 1 | 1 | 1 | 1 | 1 |
| 14790 | 8  | 1 | 1 | 1 | 1 | 1 | 0 | 1 |
| 474   | 9  | 1 | 1 | 1 | 1 | 1 | 1 | 1 |
| 2510  | 9  | 1 | 1 | 1 | 1 | 1 | 1 | 1 |
| 4430  | 9  | 1 | 1 | 1 | 1 | 1 | 0 | 1 |
| 4442  | 9  | 1 | 1 | 1 | 1 | 1 | 0 | 1 |
| 4558  | 9  | 1 | 1 | 1 | 1 | 1 | 0 | 1 |
| 4814  | 9  | 1 | 1 | 1 | 1 | 1 | 0 | 1 |
| 5010  | 9  | 1 | 1 | 1 | 1 | 1 | 0 | 1 |
| 6358  | 9  | 1 | 1 | 1 | 1 | 1 | 1 | 1 |
| 6364  | 9  | 1 | 1 | 1 | 1 | 1 | 0 | 1 |
| 6550  | 9  | 1 | 1 | 1 | 1 | 1 | 0 | 1 |
| 6602  | 9  | 1 | 1 | 1 | 1 | 1 | 0 | 1 |
| 6854  | 9  | 1 | 1 | 1 | 1 | 1 | 1 | 1 |
| 6858  | 9  | 1 | 1 | 1 | 1 | 1 | 1 | 1 |
| 5006  | 10 | 1 | 1 | 1 | 1 | 1 | 1 | 1 |
| 5020  | 10 | 1 | 1 | 1 | 1 | 1 | 0 | 1 |
| 6862  | 10 | 1 | 1 | 1 | 1 | 1 | 1 | 1 |
| 6876  | 10 | 1 | 1 | 1 | 1 | 1 | 1 | 1 |

|       |    |   |   |   |   |   |   |   |
|-------|----|---|---|---|---|---|---|---|
| 350   | 12 | 1 | 1 | 1 | 1 | 1 | 1 | 1 |
| 470   | 12 | 1 | 1 | 1 | 1 | 1 | 1 | 1 |
| 478   | 12 | 1 | 1 | 1 | 1 | 1 | 1 | 1 |
| 858   | 12 | 1 | 1 | 1 | 1 | 1 | 1 | 1 |
| 926   | 12 | 1 | 1 | 1 | 1 | 1 | 1 | 1 |
| 974   | 12 | 1 | 1 | 1 | 1 | 1 | 1 | 1 |
| 2526  | 12 | 1 | 1 | 1 | 1 | 1 | 1 | 1 |
| 4438  | 12 | 1 | 1 | 1 | 1 | 1 | 1 | 1 |
| 4446  | 12 | 1 | 1 | 1 | 1 | 1 | 1 | 1 |
| 4566  | 12 | 1 | 1 | 1 | 1 | 1 | 1 | 1 |
| 4574  | 12 | 1 | 1 | 1 | 1 | 1 | 1 | 1 |
| 4694  | 12 | 1 | 1 | 1 | 1 | 1 | 1 | 1 |
| 4702  | 12 | 1 | 1 | 1 | 1 | 1 | 1 | 1 |
| 4766  | 12 | 1 | 1 | 1 | 1 | 1 | 1 | 1 |
| 4830  | 12 | 1 | 1 | 1 | 1 | 1 | 1 | 1 |
| 4946  | 12 | 1 | 1 | 1 | 1 | 1 | 1 | 1 |
| 4954  | 12 | 1 | 1 | 1 | 1 | 1 | 1 | 1 |
| 5014  | 12 | 1 | 1 | 1 | 1 | 1 | 1 | 1 |
| 5018  | 12 | 1 | 1 | 1 | 1 | 1 | 1 | 1 |
| 5022  | 12 | 1 | 1 | 1 | 1 | 1 | 1 | 1 |
| 5062  | 12 | 1 | 1 | 1 | 1 | 1 | 1 | 1 |
| 5070  | 12 | 1 | 1 | 1 | 1 | 1 | 1 | 1 |
| 5074  | 12 | 1 | 1 | 1 | 1 | 1 | 1 | 1 |
| 5076  | 12 | 1 | 1 | 1 | 1 | 1 | 1 | 1 |
| 5082  | 12 | 1 | 1 | 1 | 1 | 1 | 1 | 1 |
| 5084  | 12 | 1 | 1 | 1 | 1 | 1 | 1 | 1 |
| 6366  | 12 | 1 | 1 | 1 | 1 | 1 | 1 | 1 |
| 6554  | 12 | 1 | 1 | 1 | 1 | 1 | 1 | 1 |
| 6558  | 12 | 1 | 1 | 1 | 1 | 1 | 1 | 1 |
| 6604  | 12 | 1 | 1 | 1 | 1 | 1 | 1 | 1 |
| 6606  | 12 | 1 | 1 | 1 | 1 | 1 | 1 | 1 |
| 6614  | 12 | 1 | 1 | 1 | 1 | 1 | 1 | 1 |
| 6618  | 12 | 1 | 1 | 1 | 1 | 1 | 1 | 1 |
| 6620  | 12 | 1 | 1 | 1 | 1 | 1 | 1 | 1 |
| 6622  | 12 | 1 | 1 | 1 | 1 | 1 | 1 | 1 |
| 6870  | 12 | 1 | 1 | 1 | 1 | 1 | 1 | 1 |
| 6874  | 12 | 1 | 1 | 1 | 1 | 1 | 1 | 1 |
| 6878  | 12 | 1 | 1 | 1 | 1 | 1 | 1 | 1 |
| 7130  | 12 | 1 | 1 | 1 | 1 | 1 | 1 | 1 |
| 13146 | 12 | 1 | 1 | 1 | 1 | 1 | 1 | 1 |
| 13148 | 12 | 1 | 1 | 1 | 1 | 1 | 1 | 1 |
| 13262 | 12 | 1 | 1 | 1 | 1 | 1 | 1 | 1 |
| 14678 | 12 | 1 | 1 | 1 | 1 | 1 | 1 | 1 |
| 14686 | 12 | 1 | 1 | 1 | 1 | 1 | 1 | 1 |
| 14798 | 12 | 1 | 1 | 1 | 1 | 1 | 1 | 1 |

|       |    |   |   |   |   |   |   |   |
|-------|----|---|---|---|---|---|---|---|
| 14812 | 12 | 1 | 1 | 1 | 1 | 1 | 1 | 1 |
| 15310 | 12 | 1 | 1 | 1 | 1 | 1 | 1 | 1 |
| 862   | 13 | 1 | 1 | 1 | 1 | 1 | 1 | 1 |
| 990   | 13 | 1 | 1 | 1 | 1 | 1 | 1 | 1 |
| 3038  | 13 | 1 | 1 | 1 | 1 | 1 | 1 | 1 |
| 4950  | 13 | 1 | 1 | 1 | 1 | 1 | 1 | 1 |
| 4958  | 13 | 1 | 1 | 1 | 1 | 1 | 1 | 1 |
| 5078  | 13 | 1 | 1 | 1 | 1 | 1 | 1 | 1 |
| 5086  | 13 | 1 | 1 | 1 | 1 | 1 | 1 | 1 |
| 7126  | 13 | 1 | 1 | 1 | 1 | 1 | 1 | 1 |
| 7134  | 13 | 1 | 1 | 1 | 1 | 1 | 1 | 1 |
| 13142 | 13 | 1 | 1 | 1 | 1 | 1 | 1 | 1 |
| 13150 | 13 | 1 | 1 | 1 | 1 | 1 | 1 | 1 |
| 13278 | 13 | 1 | 1 | 1 | 1 | 1 | 1 | 1 |
| 14810 | 13 | 1 | 1 | 1 | 1 | 1 | 1 | 1 |
| 14814 | 13 | 1 | 1 | 1 | 1 | 1 | 1 | 1 |
| 15258 | 13 | 1 | 1 | 1 | 1 | 1 | 1 | 1 |
| 15262 | 13 | 1 | 1 | 1 | 1 | 1 | 1 | 1 |
| 15326 | 13 | 1 | 1 | 1 | 1 | 1 | 1 | 1 |
| 31710 | 13 | 1 | 1 | 1 | 1 | 1 | 1 | 1 |

| 78 | 98 | 102 | 108 | 110 | 238 |
|----|----|-----|-----|-----|-----|
| 0  | 0  | 0   | 0   | 0   | 0   |
| 0  | 0  | 0   | 0   | 0   | 0   |
| 0  | 0  | 0   | 0   | 0   | 0   |
| 0  | 0  | 0   | 0   | 0   | 0   |
| 0  | 0  | 0   | 0   | 0   | 0   |
| 0  | 0  | 0   | 0   | 0   | 0   |
| 0  | 0  | 0   | 0   | 0   | 0   |
| 0  | 0  | 0   | 0   | 0   | 0   |
| 0  | 0  | 0   | 0   | 0   | 0   |
| 0  | 0  | 0   | 0   | 0   | 0   |
| 0  | 0  | 0   | 0   | 0   | 0   |
| 0  | 1  | 0   | 0   | 0   | 0   |
| 0  | 0  | 0   | 0   | 0   | 0   |
| 0  | 0  | 0   | 0   | 0   | 0   |
| 0  | 0  | 0   | 0   | 0   | 0   |
| 0  | 0  | 0   | 0   | 0   | 0   |
| 0  | 0  | 0   | 0   | 0   | 0   |
| 0  | 1  | 0   | 0   | 0   | 0   |
| 0  | 0  | 0   | 0   | 0   | 0   |
| 0  | 0  | 0   | 0   | 0   | 0   |
| 0  | 0  | 0   | 0   | 0   | 0   |
| 0  | 0  | 0   | 0   | 0   | 0   |
| 0  | 0  | 0   | 0   | 0   | 0   |
| 0  | 0  | 0   | 0   | 0   | 0   |
| 0  | 0  | 0   | 0   | 0   | 0   |
| 0  | 0  | 0   | 0   | 0   | 0   |
| 0  | 0  | 0   | 0   | 0   | 0   |
| 0  | 0  | 0   | 0   | 0   | 0   |
| 0  | 0  | 0   | 0   | 0   | 0   |
| 0  | 0  | 0   | 0   | 0   | 0   |
| 0  | 0  | 0   | 0   | 0   | 0   |
| 0  | 0  | 0   | 0   | 0   | 0   |
| 0  | 0  | 0   | 0   | 0   | 0   |
| 0  | 0  | 0   | 0   | 0   | 0   |
| 0  | 0  | 0   | 0   | 0   | 0   |
| 0  | 1  | 0   | 0   | 0   | 0   |
| 0  | 0  | 0   | 0   | 0   | 0   |
| 0  | 0  | 0   | 0   | 0   | 0   |
| 0  | 0  | 0   | 0   | 0   | 0   |
| 0  | 0  | 0   | 0   | 0   | 0   |
| 0  | 1  | 0   | 0   | 0   | 0   |
| 0  | 0  | 0   | 0   | 0   | 0   |
| 0  | 1  | 0   | 0   | 0   | 0   |

|   |   |   |   |   |   |
|---|---|---|---|---|---|
| 0 | 0 | 0 | 0 | 0 | 0 |
| 0 | 0 | 0 | 0 | 0 | 0 |
| 0 | 1 | 0 | 0 | 0 | 0 |
| 0 | 0 | 0 | 0 | 0 | 0 |
| 0 | 0 | 0 | 0 | 0 | 0 |
| 0 | 1 | 0 | 0 | 0 | 0 |
| 0 | 0 | 0 | 0 | 0 | 0 |
| 0 | 1 | 0 | 0 | 0 | 0 |
| 0 | 1 | 0 | 0 | 0 | 0 |
| 0 | 0 | 0 | 0 | 0 | 0 |
| 0 | 0 | 0 | 0 | 0 | 0 |
| 1 | 0 | 0 | 0 | 0 | 0 |
| 1 | 0 | 0 | 0 | 0 | 0 |
| 0 | 0 | 0 | 0 | 0 | 0 |
| 0 | 0 | 0 | 1 | 0 | 0 |
| 0 | 0 | 0 | 0 | 0 | 0 |
| 0 | 0 | 0 | 0 | 0 | 0 |
| 1 | 0 | 0 | 0 | 0 | 0 |
| 0 | 0 | 0 | 0 | 0 | 0 |
| 0 | 0 | 0 | 0 | 0 | 0 |
| 1 | 0 | 0 | 0 | 0 | 0 |
| 1 | 0 | 0 | 0 | 0 | 0 |
| 0 | 1 | 0 | 0 | 0 | 0 |
| 1 | 0 | 0 | 0 | 0 | 0 |
| 0 | 0 | 0 | 1 | 0 | 0 |
| 1 | 0 | 0 | 0 | 0 | 0 |
| 0 | 0 | 0 | 1 | 0 | 0 |
| 0 | 0 | 0 | 1 | 0 | 0 |
| 1 | 0 | 0 | 0 | 0 | 0 |
| 0 | 0 | 0 | 1 | 0 | 0 |
| 0 | 0 | 0 | 1 | 0 | 0 |
| 1 | 0 | 0 | 0 | 0 | 0 |
| 0 | 0 | 0 | 1 | 0 | 0 |
| 0 | 0 | 0 | 0 | 0 | 0 |
| 0 | 0 | 0 | 1 | 0 | 0 |
| 0 | 0 | 0 | 0 | 0 | 0 |
| 0 | 0 | 0 | 1 | 0 | 0 |
| 0 | 0 | 0 | 1 | 0 | 0 |
| 0 | 0 | 0 | 0 | 0 | 0 |
| 0 | 1 | 1 | 0 | 0 | 0 |
| 0 | 1 | 1 | 0 | 0 | 0 |
| 1 | 0 | 0 | 0 | 0 | 0 |

|   |   |   |   |   |   |
|---|---|---|---|---|---|
| 0 | 1 | 1 | 0 | 0 | 0 |
| 0 | 1 | 1 | 0 | 0 | 0 |
| 0 | 0 | 0 | 1 | 0 | 0 |
| 0 | 1 | 1 | 0 | 0 | 0 |
| 1 | 0 | 0 | 0 | 0 | 0 |
| 0 | 0 | 0 | 1 | 0 | 0 |
| 0 | 1 | 1 | 0 | 0 | 0 |
| 0 | 1 | 1 | 0 | 0 | 0 |
| 1 | 0 | 0 | 1 | 0 | 0 |
| 0 | 1 | 1 | 0 | 0 | 0 |
| 0 | 1 | 1 | 0 | 0 | 0 |
| 1 | 0 | 0 | 1 | 0 | 0 |
| 0 | 1 | 1 | 0 | 0 | 0 |
| 0 | 1 | 1 | 0 | 0 | 0 |
| 0 | 1 | 1 | 0 | 0 | 0 |
| 0 | 1 | 0 | 1 | 0 | 0 |
| 0 | 1 | 0 | 0 | 0 | 0 |
| 0 | 1 | 1 | 0 | 0 | 0 |
| 0 | 1 | 1 | 0 | 0 | 0 |
| 0 | 1 | 1 | 0 | 0 | 0 |
| 0 | 1 | 1 | 0 | 0 | 0 |
| 0 | 0 | 0 | 1 | 0 | 0 |
| 0 | 1 | 1 | 0 | 0 | 0 |
| 0 | 1 | 1 | 0 | 0 | 0 |
| 0 | 1 | 1 | 0 | 0 | 0 |
| 0 | 1 | 1 | 0 | 0 | 0 |
| 0 | 1 | 1 | 0 | 0 | 0 |
| 0 | 1 | 1 | 0 | 0 | 0 |
| 0 | 1 | 1 | 0 | 0 | 0 |
| 0 | 1 | 1 | 0 | 0 | 0 |
| 0 | 1 | 1 | 0 | 0 | 0 |
| 0 | 1 | 1 | 0 | 0 | 0 |
| 1 | 1 | 1 | 0 | 0 | 0 |
| 1 | 1 | 1 | 0 | 0 | 0 |
| 1 | 1 | 1 | 0 | 0 | 0 |
| 0 | 1 | 1 | 1 | 0 | 0 |
| 0 | 1 | 1 | 1 | 0 | 0 |
| 0 | 1 | 1 | 0 | 0 | 0 |
| 0 | 1 | 1 | 1 | 0 | 0 |
| 1 | 1 | 1 | 0 | 0 | 0 |
| 0 | 1 | 1 | 1 | 0 | 0 |
| 0 | 1 | 0 | 1 | 0 | 0 |
| 0 | 1 | 1 | 0 | 0 | 0 |
| 1 | 1 | 1 | 0 | 0 | 0 |
| 1 | 1 | 1 | 1 | 0 | 0 |
| 0 | 1 | 1 | 1 | 0 | 0 |
| 0 | 1 | 1 | 1 | 0 | 0 |
