# Supplementary material for: Dissecting molecular network structures using a network subgraph approach
Source: PubMed Central journal article supplement (PMC7512139; doi:10.7717/peerj.9556), 2020-08-06
Supplement: peerj-08-9556-s007.pdf [file peerj-08-9556-s007.pdf]

|            |       |       |       |       |             |      |       |
|------------|-------|-------|-------|-------|-------------|------|-------|
| pattern id | 6     | 12    | 14    | 36    | 38          | 46   | 74    |
| E          | 0     | 0     | -1    | 0     | 0           | -1   | -1    |
|            | 0     | 0     | 0     | 0     | 0           | 0    | 0     |
|            | 0     | 0     | 1     | 0     | 0           | 1    | 1     |
| LE         | 1     | 1     | 1     | 1     | 2           | 2    | 1     |
|            | 1     | 1     | 1.38  | 1     | 2           | 2    | 1.38  |
|            | 2     | 2     | 3.62  | 2     | 2           | 4    | 3.62  |
| QE         | 1     | 1     | 1     | 1     | 2           | 2    | 1     |
|            | 1     | 1     | 1.38  | 1     | 2           | 2    | 1.38  |
|            | 2     | 2     | 3.62  | 2     | 2           | 4    | 3.62  |
| AAt        | 0     | 0     | 0     | 0     | 0           | 0    | 0     |
|            | 0     | 1     | 1     | 0     | 0.382       | 1    | 1     |
|            | 2     | 1     | 2     | 2     | 2.62        | 3    | 2     |
| LLt        | 0.628 | 0.475 | 0.769 | 0.628 | 1.39        | 2    | 0.769 |
|            | 1     | 1.37  | 2.34  | 1     | 6.34        | 8    | 2.34  |
|            | 6.37  | 6.16  | 13.9  | 6.37  | 7.27        | 16   | 13.9  |
| energy     | 4.32  | 4.34  | 6.13  | 4.32  | 6.39        | 8.24 | 6.13  |
| QQt        | 0.628 | 0.475 | 0.769 | 0.628 | 2.32        | 3.45 | 0.769 |
|            | 1     | 1.37  | 2.34  | 1     | 2.79        | 4    | 2.34  |
|            | 6.37  | 6.16  | 13.9  | 6.37  | 9.89        | 18.5 | 13.9  |
| energy     | 4.32  | 4.34  | 6.13  | 4.32  | 6.34        | 8.16 | 6.13  |
| LQt        | -2    | -1    | -4    | -2    | -1.5+0.866i | -4   | -4    |
|            | 0     | -1    | 0     | 0     | -1.5-0.866i | 0    | 0     |
|            | 0     | 0     | 1     | 0     | 0           | 0    | 1     |
| Aqt        | 0     | 0     | -1    | 0     | -0.303      | -2   | -1    |
|            | 0     | 1     | 0     | 0     | 0           | 0    | 0     |
|            | 2     | 1     | 4     | 2     | 3.3         | 6    | 4     |
| ALt        | 1     | 1     | 1     | 1     | 4           | 4    | 1     |
|            | 1     | 1     | 3.21  | 1     | 4           | 8    | 3.21  |
|            | 4     | 4     | 7.79  | 4     | 4           | 8    | 7.79  |

|       |             |               |              |        |     |
|-------|-------------|---------------|--------------|--------|-----|
| 78    | 98          | 102           | 108          | 110    | 238 |
| -1.41 | -0.5+0.866i | -0.662+0.562i | -1           | -1     | -1  |
| 0     | -0.5-0.866i | -0.662-0.562i | 0            | -0.618 | -1  |
| 1.41  | 1           | 1.32          | 1            | 1.62   | 2   |
| 1.27  | 1           | 1.38          | 2            | 1.75   | 2   |
| 2     | 2.5+0.866i  | 3             | 2            | 3.45   | 5   |
| 4.73  | 2.5-0.866i  | 3.62          | 4            | 4.8    | 5   |
| 1.27  | 1.5+0.866i  | 1.9+0.665i    | 2.43+0.369i  |        | 3   |
| 2     | 1.5-0.866i  | 1.9-0.665i    | 2.43-0.369i  |        | 3   |
| 4.73  | 3           | 4.21          | 4            | 5.15   | 6   |
| 0     | 1           | 0.382         | 0.00E+00     | 0.198  | 1   |
| 2     | 1           | 1             | 1            | 1.55   | 1   |
| 2     | 1           | 2.62          | 3            | 3.25   | 4   |
| 1.61  | 1           | 1.79          | 2            | 2.84   | 4   |
| 4     | 7           | 7.54          | 8            | 12.6   | 25  |
| 22.4  | 7           | 16.7          | 16           | 23.6   | 25  |
| 8     | 6.29        | 8.17          | 8.24         | 10.1   | 12  |
| 1.61  | 3           | 3.58          | 3.45         | 5.49   | 9   |
| 4     | 3           | 4.51          | 4            | 6.47   | 9   |
| 22.4  | 9           | 17.9          | 18.5         | 27     | 36  |
| 8     | 6.46        | 8.25          | 8.16         | 10.1   | 12  |
| -6    | -2+1.73i    | -3.72         | -4           | -5.5   | -5  |
| 0     | -2-1.73i    | -2.15         | 0            | -2.06  | -5  |
| 2     | 1           | 1.87          | 0            | 2.56   | 4   |
| -2    | 0+1.73i     | -0.868+1.49i  | -2.83+0.501i |        | -3  |
| 0     | 0-1.73i     | -0.868-1.49i  | 0.83-0.501i  |        | -3  |
| 6     | 3           | 5.74          | 6            | 8.65   | 12  |
| 2.71  | 3           | 3.94          | 4            | 7.21   | 12  |
| 4     | 4.5+0.866i  | 8.03+0.495i   | 8            | 9.12   | 15  |
| 13.3  | 4.5-0.866i  | 8.03-0.495i   | 8            | 13.7   | 15  |

| pattern id | 6                                                              | 12                                                                      | 14                                                                  |
|------------|----------------------------------------------------------------|-------------------------------------------------------------------------|---------------------------------------------------------------------|
| E          | [0;0;1]<br>[0;0;-1]<br>[0;0;-1]                                | [0;1;0]<br>[0;-1;0]<br>[0;1;0]                                          | [0;0.707;-0.707]<br>[0.707;-0.707;0]<br>[0;0.707;0.707]             |
| LE         | [0.707;0;0.707]<br>[0;0.707;0.707]<br>[0;0;1]                  | [0;1;0]<br>[0;1;0]<br>[0;-0.707;0.707]                                  | [0.577;0.577;0.577]<br>[0;0.851;0.526]<br>[0;-0.526;0.851]          |
| QE         | [0.707;0;-0.707]<br>[0;0.707;-0.707]<br>[0;0;1]                | [0;1;0]<br>[0;1;0]<br>[0;0.707;0.707]                                   | [0.577;0.577;-0.577]<br>[0;0.851;-0.526]<br>[0;0.526;0.851]         |
| AAt        | [1;0;0]<br>[0;1;0]<br>[0;0;1]                                  | [1;0;0]<br>[0;1;0]<br>[0;0;1]                                           | [1;0;0]<br>[0;1;0]<br>[0;0;1]                                       |
| LLt        | [0.684;0.684;0.255]<br>[0.707;-0.707;0]<br>[-0.18;-0.18;0.967] | [-0.756;-0.521;-0.397]<br>[-0.632;0.739;0.233]<br>[-0.172;-0.427;0.888] | [0.941;0.257;0.218]<br>[-0.33;0.833;0.443]<br>[-0.0675;-0.489;0.87] |
| QQt        | [0.684;0.684;-0.255]<br>[0.707;-0.707;0]<br>[0.18;0.18;0.967]  | [0.756;0.521;-0.397]<br>[0.632;-0.739;0.233]<br>[0.172;0.427;0.888]     | [0.941;0.257;-0.218]<br>[-0.33;0.833;-0.443]<br>[0.0675;0.489;0.87] |
| LQt        | [0;0;1]<br>[0.894;0;0.447]<br>[0;0.894;0.447]                  | [0;1;0]<br>[0;-1;0]<br>[0.408;0.816;0.408]                              | [0;0.707;-0.707]<br>[0.784;-0.588;-0.196]<br>[0;-0.832;-0.555]      |
| AQt        | [0.894;0;-0.447]<br>[0;0.894;-0.447]<br>[0;0;1]                | [0.408;0.816;-0.408]<br>[0;1;0]<br>[0;-1;0]                             | [0;0.832;-0.555]<br>[0.784;-0.588;0.196]<br>[0;0.707;0.707]         |
| ALt        | [0.949;0;-0.316]<br>[0;0.949;-0.316]<br>[0;0;1]                | [0;1;0]<br>[0;1;0]<br>[0;-0.316;0.949]                                  | [0.905;0.302;-0.302]<br>[0;0.979;-0.204]<br>[0;-0.204;0.979]        |

|                        |                        |                                   |    |
|------------------------|------------------------|-----------------------------------|----|
| 36                     | 38                     | 46                                | 74 |
| [0;0;1]                | [0;0;1]                | [0;0.707;-C[-0.577;-0.577;0.577]  |    |
| [0;1;0]                | [0;0;-1]               | [0.577;-0.5[1;0;0]                |    |
| [0;-0.707;-0.707]      | [0;0;1]                | [0;0.707;0.[0.577;0.577;0.577]    |    |
| [0;0;1]                | [0;0;1]                | [0;0.707;0.[1;0;0]                |    |
| [0;1;0]                | [0;0;1]                | [0;0.707;0.[0.809;-0.5;-0.309]    |    |
| [0.577;-0.577;-0.577]  | [0;0;1]                | [0;-0.707;C[0.309;0.5;-0.809]     |    |
| [0;0;1]                | [0;0;1]                | [0;0.707;-C[1;0;0]                |    |
| [0;1;0]                | [0;0;-1]               | [0.816;-0.4[0.809;-0.5;0.309]     |    |
| [0.577;0.577;0.577]    | [0;0;1]                | [0;0.707;0.[-0.309;-0.5;-0.809]   |    |
| [1;0;0]                | [1;0;0]                | [1;0;0] [-0.707;0.707;0]          |    |
| [0;-0.707;0.707]       | [0;-0.851;0.526]       | [0;-0.707;C[0;0;1]                |    |
| [0;0.707;0.707]        | [0;0.526;0.851]        | [0;0.707;0.[0.707;0.707;0]        |    |
| [-0.643;-0.542;-0.542] | [-0.733;-0.525;-0.432] | [0.816;0.4[-0.825;-0.339;-0.452]  |    |
| [0;-0.707;0.707]       | [0.343;-0.834;0.432]   | [-0.577;0.5[-0.505;0.8;0.324]     |    |
| [-0.766;0.454;0.454]   | [-0.587;0.169;0.792]   | [0;-0.707;C[-0.251;-0.496;0.831]  |    |
| [-0.643;0.542;0.542]   | [0.491;-0.786;0.374]   | [0.982;-0.1[0.825;0.339;-0.452]   |    |
| [0;-0.707;0.707]       | [0.756;0.172;-0.631]   | [0;0.707;-C[0.505;-0.8;0.324]     |    |
| [0.766;0.454;0.454]    | [0.432;0.593;0.679]    | [0.191;0.6[0.251;0.496;0.831]     |    |
| [0;0.707;0.707]        | [0;0.354+0.612i;0.707] | [0;0.707;-C[0.64;0.64;-0.426]     |    |
| [0;-0.707;0.707]       | [0;0.354-0.612i;0.707] | [0;0.707;0.[-0.913;-0.183;-0.365] |    |
| [0.577;0.577;0.577]    | [0.557;0.371;0.743]    | [0;-0.707;- [0.577;0.577;0.577]   |    |
| [0;0.707;-0.707]       | [0;0.609;-0.793]       | [0;0.707;-C[-0.577;-0.577;0.577]  |    |
| [0.577;-0.577;-0.577]  | [0.218;0.436;-0.873]   | [0.905;-0.3[0.913;0.183;-0.365]   |    |
| [0;0.707;0.707]        | [0;0.398;0.917]        | [0;0.707;0.[0.64;0.64;0.426]      |    |
| [0;0;1]                | [0;0;1]                | [1;0;0] [1;0;0]                   |    |
| [0;1;0]                | [0;0;1]                | [0;1;0] [0.25;-0.948;0.198]       |    |
| [0.905;-0.302;-0.302]  | [0;1;0]                | [0;0;1] [0.25;0.198;-0.948]       |    |

|                        |                                 |                                      |
|------------------------|---------------------------------|--------------------------------------|
| 78                     | 98                              | 102                                  |
| [0.5;0.5;-0.707]       | [0.577;-0.289-0.5i;-0.289+0.5i] | [0.434-0.369i;-0.656;-0.0804+0.489i] |
| [0.707;-0.707;0]       | [0.577;-0.289+0.5i;-0.289-0.5i] | [0.434+0.369i;-0.656;-0.0804-0.489i] |
| [0.5;0.5;0.707]        | [-0.577;-0.577;-0.577]          | [-0.548;-0.414;-0.727]               |
| [0.628;0.628;0.46]     | [-0.577;-0.577;-0.577]          | [-0.4;-0.648;-0.648]                 |
| [0.707;-0.707;0]       | [-0.289+0.5i;-0.289-0.5i;0.577] | [0.707;-0.707;0]                     |
| [-0.325;-0.325;0.888]  | [-0.289-0.5i;-0.289+0.5i;0.577] | [0.753;-0.465;-0.465]                |
| [0.628;0.628;-0.46]    | [-0.289-0.5i;-0.289+0.5i;0.577] | [-0.0692+0.448i;0.673;-0.222-0.54i]  |
| [0.707;-0.707;0]       | [-0.289+0.5i;-0.289-0.5i;0.577] | [-0.0692-0.448i;0.673;-0.222+0.54i]  |
| [0.325;0.325;0.888]    | [-0.577;-0.577;-0.577]          | [0.613;0.278;0.739]                  |
| [-0.707;0.707;0]       | [1;0;0]                         | [0;-0.851;0.526]                     |
| [0.707;0.707;0]        | [0;1;0]                         | [1;0;0]                              |
| [0;0;1]                | [0;0;1]                         | [0;0.526;0.851]                      |
| [0.628;0.628;0.46]     | [-0.577;-0.577;-0.577]          | [-0.578;-0.681;-0.45]                |
| [0.707;-0.707;0]       | [0.187;-0.782;0.595]            | [0.432;-0.723;0.539]                 |
| [-0.325;-0.325;0.888]  | [0.795;-0.235;-0.559]           | [-0.693;0.117;0.712]                 |
| [0.628;0.628;-0.46]    | [0.04;-0.726;0.686]             | [0.342;-0.934;0.101]                 |
| [0.707;-0.707;0]       | [0.816;-0.373;-0.442]           | [0.682;0.172;-0.71]                  |
| [0.325;0.325;0.888]    | [0.577;0.577;0.577]             | [0.646;0.312;0.696]                  |
| [0.577;0.577;-0.577]   | [0.577;-0.289-0.5i;-0.289+0.5i] | [0.507;-0.728;-0.461]                |
| [0.707;-0.707;0]       | [0.577;-0.289+0.5i;-0.289-0.5i] | [0.319;-0.94;-0.122]                 |
| [0.577;0.577;0.577]    | [-0.577;-0.577;-0.577]          | [0.642;0.457;0.615]                  |
| [-0.577;-0.577;0.577]  | [-0.289-0.5i;-0.289+0.5i;0.577] | [0.391-0.471i;-0.623;-0.0104+0.487i] |
| [-0.707;0.707;0]       | [-0.289+0.5i;-0.289-0.5i;0.577] | [0.391+0.471i;-0.623;-0.0104-0.487i] |
| [-0.577;-0.577;-0.577] | [-0.577;-0.577;-0.577]          | [0.475;0.459;0.75]                   |
| [-0.686;-0.686;0.243]  | [-0.577;-0.577;-0.577]          | [-0.235;-0.956;0.177]                |
| [-0.707;0.707;0]       | [-0.289-0.5i;-0.289+0.5i;0.577] | [-0.19-0.341i;-0.163+0.105i;0.9]     |
| [-0.172;-0.172;0.97]   | [-0.289+0.5i;-0.289-0.5i;0.577] | [-0.19+0.341i;-0.163-0.105i;0.9]     |

| 108                                     | 110                              | 238                     |
|-----------------------------------------|----------------------------------|-------------------------|
| [-0.707;0;0.707]                        | [-0.707;0;0.707]                 | [-0.715;0.0166;0.699]   |
| [0;1;0]                                 | [-0.753;0.465;0.465]             | [0.394;-0.816;0.423]    |
| [0.408;0.816;0.408]                     | [0.4;0.648;0.648]                | [0.577;0.577;0.577]     |
| [0;1;0]                                 | [0.415;0.748;0.518]              | [0.577;0.577;0.577]     |
| [0;1;0]                                 | [0.603;-0.752;-0.268]            | [0.154;-0.772;0.617]    |
| [0.707;0;-0.707]                        | [-0.474;-0.211;0.855]            | [-0.802;0.267;0.535]    |
| [0;1;0]                                 | [0.682;-0.159-0.541i;-0.392+0.25 | [-0.816;0.39;0.426]     |
| [-0.707;0;0.707]                        | [0.682;-0.159+0.541i;-0.392-0.25 | [0.0211;-0.717;0.696]   |
| [0.577;0.577;0.577]                     | [0.359;0.526;0.771]              | [0.577;0.577;0.577]     |
| [0.577;-0.577;0.577]                    | [0.737;-0.591;0.328]             | [0.408;0.408;-0.816]    |
| [-0.707;0;0.707]                        | [-0.591;-0.328;0.737]            | [0.707;-0.707;0]        |
| [0.408;0.816;0.408]                     | [0.328;0.737;0.591]              | [0.577;0.577;0.577]     |
| [0.577;0.577;0.577]                     | [0.659;0.543;0.519]              | [0.577;0.577;0.577]     |
| [0.408;-0.816;0.408]                    | [0.643;-0.765;-0.0162]           | [-0.408;-0.408;0.816]   |
| [-0.707;0;0.707]                        | [-0.389;-0.345;0.854]            | [0.707;-0.707;0]        |
| [0.291;-0.912;0.291]                    | [0.481;0.591;-0.647]             | [-0.401;0.816;-0.415]   |
| [0.707;0;-0.707]                        | [0.766;-0.643;-0.0188]           | [0.711;-0.00834;-0.703] |
| [0.645;0.411;0.645]                     | [0.427;0.487;0.762]              | [0.577;0.577;0.577]     |
| [-0.707;0;0.707]                        | [-0.675;-0.218;0.704]            | [-0.756;0.11;0.646]     |
| [0.408+6.04e-09i;0.816;0.408+6.04e-09i] | [-0.527;0.781;0.335]             | [-0.309;0.809;-0.5]     |
| [0.408-6.04e-09i;0.816;0.408-6.04e-09i] | [-0.504;-0.618;-0.603]           | [0.577;0.577;0.577]     |
| [-0.707;0;0.707]                        | [0.796;-0.103-0.214i;-0.536+0.15 | [-0.458;0.814;-0.356]   |
| [0.236;-0.943;0.236]                    | [0.796;-0.103+0.214i;-0.536-0.15 | [0.676;0.0588;-0.735]   |
| [-0.408;-0.816;-0.408]                  | [0.403;0.692;0.598]              | [0.577;0.577;0.577]     |
| [0;1;0]                                 | [-0.731;-0.675;0.0995]           | [0.577;0.577;0.577]     |
| [0.894;-0.447;0]                        | [0.571;-0.804;0.165]             | [-0.408;-0.408;0.816]   |
| [0;-0.447;0.894]                        | [-0.111;-0.313;0.943]            | [0.707;-0.707;0]        |

|            |       |       |       |              |               |              |       |
|------------|-------|-------|-------|--------------|---------------|--------------|-------|
| pattern id | 14    | 28    | 30    | 74           | 76            | 78           | 90    |
| E          | 0     | 0     | -1    | 0            | 0             | 0            | -1    |
|            | 0     | 0     | 0     | 0            | 0             | 0            | 0     |
|            | 0     | 0     | 0     | 0            | 0             | 0            | 0     |
|            | 0     | 0     | 1     | 0            | 0             | 0            | 1     |
| LE         | 1     | 1     | 1     | 1            | 1             | 1            | 1     |
|            | 1     | 1     | 1     | 1            | 1             | 2            | 1     |
|            | 1     | 1     | 1.59  | 2            | 2             | 2            | 2     |
|            | 3     | 3     | 4.41  | 2            | 2             | 3            | 4     |
| QE         | 1     | 1     | 1     | 1            | 1             | 1            | 1     |
|            | 1     | 1     | 1     | 1            | 1             | 2            | 1     |
|            | 1     | 1     | 1.59  | 2            | 2             | 2            | 2     |
|            | 3     | 3     | 4.41  | 2            | 2             | 3            | 4     |
| AAt        | 0     | 0     | 0     | 0            | 0             | 0            | 0     |
|            | 0     | 0     | 0     | 0            | 0             | 0            | 0     |
|            | 0     | 1     | 1     | 1            | 0.382         | 0.586        | 2     |
|            | 3     | 2     | 3     | 2            | 2.62          | 3.41         | 2     |
| LLt        | 0.734 | 0.536 | 0.793 | 0.642        | 0.71          | 0.875        | 0.764 |
|            | 1     | 1     | 1     | 0.851        | 0.804         | 2            | 0.938 |
|            | 1     | 1.39  | 2.9   | 3.8          | 3.52          | 6.53         | 5.24  |
|            | 12.3  | 12.1  | 21.3  | 7.71         | 7.97          | 12.6         | 17.1  |
| QQt        | 0.734 | 0.536 | 0.793 | 0.642        | 0.71          | 0.886        | 0.764 |
|            | 1     | 1     | 1     | 0.851        | 0.804         | 2.43         | 0.938 |
|            | 1     | 1.39  | 2.9   | 3.8          | 3.52          | 4.83         | 5.24  |
|            | 12.3  | 12.1  | 21.3  | 7.71         | 7.97          | 13.9         | 17.1  |
| LQt        | 1     | 0.697 | 1     | $1.19+0.33i$ | $1.34+0.275i$ | 1.13         | 1.17  |
|            | 1     | 1     | 1.14  | $1.19-0.33i$ | $1.34-0.275i$ | $3.86+3.13i$ | 1.17  |
|            | 1.7   | 3     | 3.46  | $2.31+2.27i$ | $2.16+1.97i$  | $3.86-3.13i$ | 6.83  |
|            | 5.3   | 4.3   | 12.4  | $2.31-2.27i$ | $2.16-1.97i$  | 5.14         | 6.83  |
| AQt        | 0     | 0     | -1    | 0            | 0             | 0            | -1    |
|            | 0     | 0     | 0     | 0            | 0             | 0            | 0     |
|            | 0     | 1     | 0     | 1            | 0.382         | 0            | 0     |
|            | 3     | 2     | 5     | 2            | 2.62          | 4            | 5     |
| Alt        | -3    | -2    | -5    | -2           | -2.62         | -2           | -5    |
|            | 0     | -1    | 0     | -1           | -0.382        | -2           | 0     |
|            | 0     | 0     | 0     | 0            | 0             | 0            | 0     |
|            | 0     | 0     | 1     | 0            | 0             | 0            | 1     |

|            |            |         |            |           |       |        |       |            |
|------------|------------|---------|------------|-----------|-------|--------|-------|------------|
| 92         | 94         | 204     | 206        | 222       | 280   | 282    | 286   | 328        |
| 0          | -1         | 0       | 0          | -1        | 0     | -1     | -1.41 | 0          |
| 0          | 0          | 0       | 0          | 0         | 0     | 0      | 0     | 0          |
| 0          | 0          | 0       | 0          | 0         | 0     | 0      | 0     | 0          |
| 0          | 1          | 0       | 0          | 1         | 0     | 1      | 1.41  | 0          |
| 1          | 1          | 2       | 2          | 2         | 1     | 1      | 1     | 1          |
| 2          | 2          | 2       | 2          | 2         | 1     | 1      | 1.44  | 1          |
| 2          | 2.38       | 2       | 3          | 3         | 1     | 1.59   | 2     | 2          |
| 3          | 4.62       | 2       | 3          | 5         | 3     | 4.41   | 5.56  | 2          |
| 1          | 1          | 2       | 2          | 2         | 1     | 1      | 1     | 1          |
| 2          | 2          | 2       | 2          | 2         | 1     | 1      | 1.44  | 1          |
| 2          | 2.38       | 2       | 3          | 3         | 1     | 1.59   | 2     | 2          |
| 3          | 4.62       | 2       | 3          | 5         | 3     | 4.41   | 5.56  | 2          |
| 0          | 0          | 0       | 0          | 0         | 0     | 0      | 0     | 0          |
| 0          | 0          | 0       | 0          | 0         | 0     | 0      | 0     | 1          |
| 1          | 1.38       | 0       | 0.438      | 1         | 1     | 2      | 2     | 1          |
| 3          | 3.62       | 4       | 4.56       | 5         | 2     | 2      | 3     | 1          |
| 0.838      | 0.907      | 1.53    | 2.09       | 2.48      | 0.536 | 0.656  | 0.875 | 0.536      |
| 2          | 2.6        | 4       | 4          | 4         | 1     | 1.23   | 2.3   | 1          |
| 7.16       | 9.21       | 4       | 12         | 14.5      | 1.39  | 2.85   | 4     | 4          |
| 12         | 22.3       | 10.5    | 12.9       | 25        | 12.1  | 21.3   | 31.8  | 7.46       |
| 0.856      | 0.914      | 1.53    | 2.82       | 3.38      | 0.536 | 0.656  | 0.875 | 0.536      |
| 2.73       | 3.47       | 4       | 4          | 4         | 1     | 1.23   | 2.3   | 1          |
| 4.4        | 6.27       | 4       | 6.48       | 9         | 1.39  | 2.85   | 4     | 4          |
| 14         | 24.3       | 10.5    | 17.7       | 29.6      | 12.1  | 21.3   | 31.8  | 7.46       |
| 1.09       | 1.07       | 2+3.46i | 4          | 4         | 0.697 | 0.779  | 1.03  | 1.02+0.48i |
| 3.94+3.28i | 5.64+1.95i | 2-3.46i | 4.82+4.56i | 7.5+1.94i | 1     | 1.5    | 2.97  | 1.02-0.48i |
| 3.94-3.28i | 5.64-1.95i | 4       | 4.82-4.56i | 7.5-1.94i | 3     | 3.42   | 4     | 2.48+2.54i |
| 5.02       | 12.6       | 4       | 7.35       | 15        | 4.3   | 12.3   | 21    | 2.48-2.54i |
| 0          | -2         | 0       | -0.702     | -3        | 0     | -0.828 | -2    | 0          |
| 0          | 0          | 0       | 0          | 0         | 0     | 0      | 0     | 1          |
| 0          | 0          | 0       | 0          | 0         | 1     | 0      | 0     | 1          |
| 4          | 7          | 4       | 5.7        | 9         | 2     | 4.83   | 7     | 1          |
| -2+1.41i   | -5         | -4      | -2.5+1.32i | -5        | -2    | -4.83  | -7    | -1         |
| -2-1.41i   | 0          | 0       | -2.5-1.32i | -1        | -1    | 0      | 0     | -1         |
| 0          | 0          | 0       | 0          | 0         | 0     | 0      | 0     | -1         |
| 0          | 0          | 0       | 0          | 0         | 0     | 0.828  | 2     | 0          |



|  | 330         | 332            | 334            | 344           | 346            | 348              | 350        | 390         | 392         |
|--|-------------|----------------|----------------|---------------|----------------|------------------|------------|-------------|-------------|
|  | -0.5+0.866i | -1 -0.662+0.5i |                | 0 -0.662+0.5i |                | -1               | -1         | -1          | 0           |
|  | -0.5-0.866i | 0 -0.662-0.5i  |                | 0 -0.662-0.5i |                | 0                | -0.618     | 0           | 0           |
|  | 0           | 0              | 0              | 0             | 0              | 0                | 0          | 0           | 0           |
|  | 1           | 1              | 1.32           | 0             | 1.32           | 1                | 1.62       | 1           | 0           |
|  | 1           | 1              | 1              | 1             | 1              | 1                | 1          | 1           | 1           |
|  | 1.25        | 1              | 1.59           | 2             | 1.59           | 2                | 2          | 1.38        | 1           |
|  | 2.88+0.745i | 2              | 3              | 2             | 3              | 2.38             | 3.38       | 2           | 2           |
|  | 2.88-0.745i | 4              | 4.41           | 3             | 4.41           | 4.62             | 5.62       | 3.62        | 2           |
|  | 1           | 1              | 1              | 1             | 1              | 1                | 1          | 1           | 1           |
|  | 1.77+0.793i | 1 2.12+0.59i   |                | 2 2.12+0.59i  |                | 2 2.58+0.425i    |            | 1.38        | 1           |
|  | 1.77-0.793i | 2 2.12-0.59i   |                | 2 2.12-0.59i  |                | 2.38 2.58-0.425i |            | 2           | 2           |
|  | 3.47        | 4              | 4.77           | 3             | 4.77           | 4.62             | 5.83       | 3.62        | 2           |
|  | 0           | 0              | 0              | 0             | 0              | 0                | 0          | 0           | 0           |
|  | 1           | 0.382          | 0.586          | 0.382         | 0.382          | 0.198            | 0.268      | 1           | 0           |
|  | 1           | 1              | 1              | 1             | 2              | 1.55             | 2          | 1           | 1           |
|  | 2           | 2.62           | 3.41           | 2.62          | 2.62           | 3.25             | 3.73       | 2           | 2           |
|  | 0.778       | 0.719          | 0.892          | 0.77          | 0.855          | 0.865            | 0.917      | 0.706       | 0.642       |
|  | 1.79        | 1              | 2.47           | 2.31          | 2.59           | 2.76             | 3.84       | 1.92        | 0.851       |
|  | 6.93        | 5.21           | 8.77           | 6.54          | 8.71           | 9.12             | 12.6       | 5.21        | 3.8         |
|  | 12.5        | 17.1           | 22.9           | 12.4          | 22.8           | 22.3             | 32.7       | 14.2        | 7.71        |
|  | 0.873       | 0.719          | 0.92           | 0.852         | 0.91           | 0.906            | 0.939      | 0.706       | 0.642       |
|  | 2.91        | 1              | 3.59           | 2.44          | 3.62           | 3.48             | 6.47       | 1.92        | 0.851       |
|  | 5.06        | 5.21           | 6.75           | 5.1           | 6.79           | 6.32             | 7.51       | 5.21        | 3.8         |
|  | 13.2        | 17.1           | 23.7           | 13.6          | 23.7           | 24.3             | 35.1       | 14.2        | 7.71        |
|  | 1.11        | 1.15+0.189i    | 1.08           | 1.06          | 1.05           | 1.05             | 1.05       | 1.46        | 1.19+0.331i |
|  | 4.03        | 1.15-0.189i    | 5.79+1.66i     | 4.06+3.41i    | 5.85+1.83i     | 5.7+2.06i        | 7.75+2.76i | 2.84        | 1.19-0.331i |
|  | 4.43+3.52i  | 6.85+0.459i    | 5.79-1.66i     | 4.06-3.41i    | 5.85-1.83i     | 5.7-2.06i        | 7.75-2.76i | 4.85+0.795i | 2.31+2.27i  |
|  | 4.43-3.52i  | 6.85-0.459i    |                | 12.3          | 4.82           | 12.3             | 12.5       | 21.4        | 4.85-0.795i |
|  | 0           | -0.777         | -0.861+1.6i    | -0.303        | -0.787+1.6i    | -2               | -1.85+0.7i | -1          | 0           |
|  | 0.162+1.94i | -0.256         | -0.861-1.6i    | 0             | -0.787-1.6i    | 0                | -1.85-0.7i | 0           | 0           |
|  | 0.162-1.94i | 0              | 0              | 1             | 0              | 0.146            | 0          | 1           | 1           |
|  | 3.68        | 5.03           | 6.72           | 3.3           | 6.57           | 6.85             | 9.7        | 4           | 2           |
|  | -2.5+1.94i  | -5.03          | -5 -1.5+0.866i | -4.85         | -4.96          | -6.74            | -6.74      | -4          | -2          |
|  | -2.5-1.94i  | 0              | -2 -1.5-0.866i | -2            | -0.0195+0.0i   | -1.91            | -1.91      | -1          | -1          |
|  | 0           | 0.256          | 0              | -1            | 0 -0.0195-0.0i | 0                | 0          | 0           | 0           |
|  | 1           | 0.777          | 2              | 0             | 1.85           | 0                | 2.64       | 1           | 0           |

|             |       |            |       |        |            |             |            |            |
|-------------|-------|------------|-------|--------|------------|-------------|------------|------------|
| 394         | 396   | 398        | 404   | 406    | 408        | 410         | 412        | 414        |
| 0           | -1    | -1         | -1    | -1.41  | 0          | -1          | -1         | -1.41      |
| 0           | 0     | 0          | 0     | 0      | 0          | 0           | 0          | 0          |
| 0           | 0     | 0          | 0     | 0      | 0          | 0           | 0          | 0          |
| 0           | 1     | 1          | 1     | 1.41   | 0          | 1           | 1          | 1.41       |
| 1           | 1     | 1.59       | 1     | 1      | 1          | 1           | 1.59       | 1.62       |
| 2           | 1.38  | 2          | 1.38  | 1.47   | 2          | 2           | 2          | 2          |
| 2           | 2     | 2          | 2     | 2.65   | 2          | 2.38        | 2          | 2.73       |
| 3           | 3.62  | 4.41       | 3.62  | 4.88   | 3          | 4.62        | 4.41       | 5.65       |
| 1           | 1     | 1.59       | 1     | 1      | 1          | 1           | 1.59       | 1.62       |
| 2           | 1.38  | 2          | 1.38  | 1.47   | 2          | 2           | 2          | 2          |
| 2           | 2     | 2          | 2     | 2.65   | 2          | 2.38        | 2          | 2.73       |
| 3           | 3.62  | 4.41       | 3.62  | 4.88   | 3          | 4.62        | 4.41       | 5.65       |
| 0           | 0     | 0          | 0     | 0      | 0          | 0           | 0          | 0          |
| 0.382       | 0.382 | 0.586      | 0.382 | 0.382  | 0          | 0.198       | 0.198      | 0.268      |
| 1           | 1     | 1          | 1     | 2      | 1          | 1.55        | 1.55       | 2          |
| 2.62        | 2.62  | 3.41       | 2.62  | 2.62   | 3          | 3.25        | 3.25       | 3.73       |
| 0.77        | 0.752 | 1.69       | 0.752 | 0.841  | 0.838      | 0.865       | 1.69       | 2.1        |
| 2.31        | 1.8   | 3.3        | 1.8   | 2.27   | 2          | 2.76        | 3.11       | 3.76       |
| 6.54        | 5.2   | 6.56       | 5.2   | 7.86   | 7.16       | 9.12        | 7.07       | 9.82       |
| 12.4        | 14.3  | 21.5       | 14.3  | 24     | 12         | 22.3        | 21.1       | 32.3       |
| 0.852       | 0.752 | 2.28       | 0.752 | 0.841  | 0.856      | 0.906       | 2.27       | 2.61       |
| 2.44        | 1.8   | 2.5        | 1.8   | 2.27   | 2.73       | 3.48        | 2.67       | 3.47       |
| 5.1         | 5.2   | 6.25       | 5.2   | 7.86   | 4.4        | 6.32        | 5.81       | 8.18       |
| 13.6        | 14.3  | 22         | 14.3  | 24     | 14         | 24.3        | 22.2       | 33.7       |
| 1.06        | 1.62  | 3.33       | 1.62  | 1.18   | 1.09       | 1.05        | 3.26       | 3.34       |
| 4.06+3.41i  | 2.73  | 3.91+2.14i | 2.73  | 3.18   | 3.94+3.28i | 5.7+2.06i   | 3.93+2.19i | 5.76+1.49i |
| 4.06-3.41i  | 4     | 3.91-2.14i | 4     | 7.12   | 3.94-3.28i | 5.7-2.06i   | 3.93-2.19i | 5.76-1.49i |
| 4.82        | 5.65  | 11.9       | 5.65  | 13.5   | 5.02       | 12.5        | 11.9       | 21.1       |
| -0.303      | -1.19 | -1.46      | -1.19 | -2.19  | 0          | -2          | -1.46      | -3         |
| 0           | 0     | 0          | 0     | 0      | 0          | 0           | 0          | 0          |
| 1           | 1     | 1          | 1     | 0.404  | 0          | 0.146       | 0.583      | 0.347      |
| 3.3         | 4.19  | 5.46       | 4.19  | 6.79   | 4          | 6.85        | 5.88       | 8.65       |
| -1.5+0.866i | -4.19 | -4.83      | -4.19 | -6.79  | -2+1.41i   | -4.96       | -3.89      | -7         |
| -1.5-0.866i | -1    | -1         | -1    | -0.404 | -2-1.41i   | -0.0195+0.  | -2.17      | -0.618     |
| -1          | 0     | 0          | 0     | 0      | 0          | -0.0195-0.i | 0          | 0          |
| 0           | 1.19  | 0.828      | 1.19  | 2.19   | 0          | 0           | 1.06       | 1.62       |

| 454         | 456         | 458          | 460        | 462         | 468       | 470         | 472         | 474         |
|-------------|-------------|--------------|------------|-------------|-----------|-------------|-------------|-------------|
| -0.662+0.5i | 0           | -0.5+0.866i  | -1         | -0.662+0.5i | -1        | -1          | 0           | -0.662+0.5i |
| -0.662-0.5i | 0           | -0.5-0.866i  | 0          | -0.662-0.5i | 0         | -0.618      | 0           | -0.662-0.5i |
| 0           | 0           | 0            | 0          | 0           | 0         | 0           | 0           | 0           |
| 1.32        | 0           | 1            | 1          | 1.32        | 1         | 1.62        | 0           | 1.32        |
| 1           | 2           | 1.53         | 2          | 2           | 1         | 1           | 2           | 1.75        |
| 1.68        | 2           | 2            | 2          | 2           | 2         | 2           | 2           | 2           |
| 3.66+0.562i | 2           | 3.23+0.793i  | 2          | 4           | 3         | 4           | 3           | 3.45        |
| 3.66-0.562i | 2           | 3.23-0.793i  | 4          | 4           | 4         | 5           | 3           | 4.8         |
| 1           | 2           | 2            | 2          | 2           | 1         | 1           | 2           | 2           |
| 2.34+0.562i | 2           | 2.12+0.745i  | 2          | 2.58+0.606i | 2         | 2.59        | 2           | 2.43+0.369i |
| 2.34-0.562i | 2           | 2.12-0.745i  | 2          | 2.58-0.606i | 3         | 3           | 3           | 2.43-0.369i |
| 4.32        | 2           | 3.75         | 4          | 4.84        | 4         | 5.41        | 3           | 5.15        |
| 0           | 0           | 0            | 0          | 0           | 0         | 0           | 0           | 0           |
| 1           | 0.382       | 1            | 0          | 0.438       | 0.268     | 0.468       | 0.268       | 0.468       |
| 1           | 1           | 1            | 1          | 1           | 1         | 1.65        | 1           | 1.65        |
| 3           | 2.62        | 3            | 4          | 4.56        | 3.73      | 3.88        | 3.73        | 3.88        |
| 0.849       | 1.3         | 1.7          | 1.78       | 2.37        | 0.883     | 0.912       | 1.95        | 2.19        |
| 2.99        | 4.45        | 4.42         | 5.41       | 5.9         | 3.14      | 3.97        | 4.4         | 4.35        |
| 12.6        | 4.58        | 11.8         | 5.93       | 12.7        | 13        | 16.8        | 11.3        | 13.7        |
| 16.6        | 9.67        | 13.1         | 17.9       | 23          | 16        | 26.3        | 13.3        | 25.7        |
| 0.882       | 1.3         | 2.75         | 1.78       | 3.14        | 0.889     | 0.925       | 2.47        | 3.19        |
| 4.43        | 4.45        | 4.4          | 5.41       | 6.5         | 4         | 5.79        | 4.4         | 4.35        |
| 8.22        | 4.58        | 7.15         | 5.93       | 8.88        | 8.09      | 10.8        | 6.95        | 9.61        |
| 19.5        | 9.67        | 16.7         | 17.9       | 25.5        | 20        | 30.5        | 17.2        | 28.9        |
| 1.12        | 2.65+2.53i  | 4.45+1.56i   | 3.18+2.89i | 6.13        | 1.14      | 1.08        | 4.78+1.53i  | 4.6         |
| 7.2+4.12i   | 2.65-2.53i  | 4.45-1.56i   | 3.18-2.89i | 7.27+3.13i  | 6.93+3.9i | 10.5+1.32i  | 4.78-1.53i  | 5.47        |
| 7.2-4.12i   | 3.35+2.8i   | 6.05+4.63i   | 7.32+1.35i | 7.27-3.13i  | 6.93-3.9i | 10.5-1.32i  | 5.72+4.33i  | 11.4        |
| 7.48        | 3.35-2.8i   | 6.05-4.63i   | 7.32-1.35i | 11.3        | 8         | 13.9        | 5.72-4.33i  | 12.5        |
| -0.629+1.5i | 0           | -0.0659+2.1i | -0.854     | -0.952+1.7i | -2        | -1.75+0.53i | -0.093+0.9i | -1.24+1.6i  |
| -0.629-1.5i | 0.379+1.1i  | -0.0659-2.1i | 0          | -0.952-1.7i | 0         | -1.75-0.53i | -0.093-0.9i | -1.24-1.6i  |
| 0           | 0.379-1.1i  | 0            | 0          | 0           | 0.628     | 0           | 0           | 0           |
| 6.26        | 3.24        | 5.13         | 5.85       | 7.9         | 6.37      | 9.51        | 5.19        | 8.49        |
| -3.5+1.66i  | -3.24       | -2.74+2.26i  | -5.85      | -4          | -4        | -5.93       | -2.39       | -4.82       |
| -3.5-1.66i  | -0.379+1.1i | -2.74-2.26i  | 0          | -3.83       | -2        | -2.94       | -1.3+1.44i  | -2.34       |
| 0           | -0.379-1.1i | 0            | 0          | 0           | 0         | 0           | -1.3-1.44i  | 0           |
| 2           | 0           | 0.476        | 0.854      | 1.83        | 1         | 2.87        | 0           | 1.15        |

|           |            |            |            |       |            |             |            |            |
|-----------|------------|------------|------------|-------|------------|-------------|------------|------------|
| 476       | 478        | 856        | 858        | 862   | 904        | 906         | 908        | 910        |
| -1        | -1         | -1         | -1         | -1    | 0          | 0           | -1         | -1         |
| 0         | -0.618     | 0          | -0.618     | -1    | 0          | 0           | 0          | 0          |
| 0         | 0          | 0          | 0          | 0     | 0          | 0           | 0          | 0          |
| 1         | 1.62       | 1          | 1.62       | 2     | 0          | 0           | 1          | 1          |
| 2         | 2          | 1          | 1          | 1     | 2          | 2           | 2          | 2          |
| 2.38      | 2.27       | 2          | 2          | 2.27  | 2          | 2           | 2          | 2.38       |
| 3         | 4          | 3          | 4          | 5     | 2          | 3           | 2          | 3          |
| 4.62      | 5.73       | 4          | 5          | 5.73  | 2          | 3           | 4          | 4.62       |
| 2         | 2          | 1          | 1          | 1     | 2          | 2           | 2          | 2          |
| 2.38      | 3          | 2          | 2.59       | 3     | 2          | 2           | 2          | 2.38       |
| 3         | 3          | 3          | 3          | 3.59  | 2          | 3           | 2          | 3          |
| 4.62      | 6          | 4          | 5.41       | 6.41  | 2          | 3           | 4          | 4.62       |
| 0         | 0          | 0          | 0          | 0     | 0          | 0           | 0          | 0          |
| 0         | 0.238      | 1          | 0.586      | 1     | 0          | 0.198       | 0.382      | 0.468      |
| 1.27      | 1.64       | 1          | 2          | 1.59  | 2          | 1.55        | 2          | 1.65       |
| 4.73      | 5.12       | 3          | 3.41       | 4.41  | 2          | 3.25        | 2.62       | 3.88       |
| 2.45      | 2.81       | 0.824      | 0.891      | 0.93  | 1.31       | 1.79        | 1.7        | 2.35       |
| 6         | 6.23       | 3.42       | 4.09       | 5.39  | 4          | 4.9         | 5.53       | 6.49       |
| 13.3      | 18.4       | 12.8       | 16.7       | 25    | 5.06       | 11.7        | 6.17       | 12.8       |
| 22.3      | 33.5       | 16         | 26.4       | 33.7  | 9.63       | 12.6        | 17.6       | 22.4       |
| 3.11      | 3.59       | 0.876      | 0.924      | 0.948 | 1.31       | 2.44        | 1.7        | 2.97       |
| 6.34      | 7.09       | 4          | 5.76       | 9     | 4          | 4.68        | 5.53       | 6.47       |
| 8.46      | 11.9       | 8.28       | 10.9       | 13.4  | 5.06       | 6.56        | 6.17       | 8.79       |
| 26.1      | 38.4       | 19.8       | 30.4       | 41.7  | 9.63       | 17.3        | 17.6       | 25.8       |
| 5.85      | 4.8        | 1.09       | 1.06       | 1.05  | 2.47+3.85i | 3.25        | 3.81+2.82i | 4.76       |
| 7.1+3.45i | 10.2+1.74i | 6.95+4.18i | 10.5+1.77i | 13    | 2.47-3.85i | 5.04+5.16i  | 3.81-2.82i | 7.49+4.31i |
| 7.1-3.45i | 10.2-1.74i | 6.95-4.18i | 10.5-1.77i | 15    | 3.07       | 5.04-5.16i  | 6.69+0.88i | 7.49-4.31i |
| 11.9      | 21.7       | 8          | 14         | 22    | 4          | 7.67        | 6.69-0.88i | 12.3       |
| -2.1      | -2.86      | -2         | -2         | -3    | 0          | -0.919      | -0.635     | -2.16      |
| 0         | -1.56      | 0          | -1.39      | -3    | 0          | 0           | 0          | 0          |
| 0         | 0          | 1          | 0          | 0     | 2          | 1.14        | 0.295      | 0.613      |
| 8.1       | 11.4       | 6          | 9.39       | 13    | 2          | 4.78        | 5.34       | 7.55       |
| -5        | -6.5       | -4         | -6         | -6.29 | -2         | -2.09+2.05i | -5.34      | -5         |
| -1        | -2.95      | -1         | -2.65      | -5    | -2         | -2.09-2.05i | -0.295     | -0.5+1.32i |
| 0         | 0          | 0          | 0          | 0     | 0          | -0.815      | 0          | -0.5-1.32i |
| 0         | 2.45       | 0          | 2.65       | 4.29  | 0          | 0           | 0.635      | 0          |

|            |             |            |           |             |       |       |            |            |
|------------|-------------|------------|-----------|-------------|-------|-------|------------|------------|
| 922        | 924         | 926        | 972       | 974         | 990   | 2184  | 2186       | 2190       |
| -1         | -0.662+0.5i | -1         | -1.41     | -1          | -1    | 0     | 0          | 0          |
| 0          | -0.662-0.5i | -0.618     | 0         | -0.618      | -1    | 0     | 0          | 0          |
| 0          | 0           | 0          | 0         | 0           | 0     | 0     | 0          | 0          |
| 1          | 1.32        | 1.62       | 1.41      | 1.62        | 2     | 0     | 0          | 0          |
| 2          | 2           | 2          | 2         | 2           | 2     | 1     | 1          | 2          |
| 2          | 2           | 2.27       | 2         | 2.38        | 2.59  | 1     | 2          | 2          |
| 3          | 4           | 4          | 3         | 4.62        | 5.41  | 1     | 2          | 3          |
| 5          | 4           | 5.73       | 5         | 5           | 6     | 3     | 3          | 3          |
| 2          | 2           | 2          | 2         | 2           | 2     | 1     | 1          | 2          |
| 2          | 2.58+0.606i | 3          | 2         | 3           | 3.27  | 1     | 2          | 2          |
| 3          | 2.58-0.606i | 3          | 3         | 3.38        | 4     | 1     | 2          | 3          |
| 5          | 4.84        | 6          | 5         | 5.62        | 6.73  | 3     | 3          | 3          |
| 0          | 0           | 0          | 0         | 0           | 0     | 0     | 0          | 0          |
| 1          | 0.586       | 1          | 0         | 0.209       | 1     | 0     | 0          | 0          |
| 1          | 2           | 1.59       | 2         | 2           | 1.44  | 0     | 0.586      | 1          |
| 4          | 3.41        | 4.41       | 4         | 4.79        | 5.56  | 3     | 3.41       | 4          |
| 2.12       | 2.25        | 2.68       | 2.24      | 2.74        | 3.05  | 0.734 | 0.875      | 2.13       |
| 4.85       | 6.27        | 6.62       | 6.91      | 7.67        | 8.43  | 1     | 2          | 4          |
| 14         | 12.8        | 18.2       | 9         | 20.5        | 30.5  | 1     | 6.53       | 10.8       |
| 25         | 22.6        | 33.5       | 25.9      | 28          | 36    | 12.3  | 12.6       | 14.1       |
| 2.95       | 3.06        | 3.51       | 2.24      | 3.3         | 3.64  | 0.734 | 0.886      | 2.56       |
| 4.6        | 6.96        | 7.28       | 6.91      | 9.31        | 11.3  | 1     | 2.43       | 4          |
| 9          | 8.54        | 11.9       | 9         | 12.5        | 16    | 1     | 4.83       | 7.43       |
| 29.4       | 25.4        | 38.3       | 25.9      | 33.9        | 47.1  | 12.3  | 13.9       | 17         |
| 3.36       | 4.78        | 4.43       | 4.6+2.79i | 5.01        | 4.52  | 1     | 1.13       | 4          |
| 7.82+3.21i | 7.67+4.22i  | 10.4+2.86i | 4.6-2.79i | 13+3.16i    | 14    | 1     | 3.86+3.13i | 5.1+4.65i  |
| 7.82-3.21i | 7.67-4.22i  | 10.4-2.86i | 9         | 13-3.16i    | 19.5  | 1.7   | 3.86-3.13i | 5.1-4.65i  |
| 15         | 11.9        | 21.7       | 13.8      | 14          | 24    | 5.3   | 5.14       | 6.8        |
| -3         | -0.84+1.79i | -3         | -2        | -1.92+0.96i | -4    | 0     | 0          | 0          |
| 0          | -0.84-1.79i | -1.16      | 0         | -1.92-0.96i | -2.72 | 0     | 0          | 0          |
| 0.469      | 0           | 0          | 0         | 0           | 0     | 0     | 0          | 0          |
| 8.53       | 7.68        | 11.2       | 8         | 10.8        | 14.7  | 3     | 4          | 5          |
| -5         | -3.81+1.68i | -6.4       | -8        | -6.73       | -6    | -3    | -2+2.17e-0 | -2.5+1.32i |
| -0.5+1.94i | -3.81-1.68i | -2.52      | 0         | -2.76       | -6    | 0     | -2-2.17e-0 | -2.5-1.32i |
| -0.5-1.94i | 0           | 0          | 0         | 0           | 0     | 0     | 0          | 0          |
| 0          | 1.62        | 1.92       | 2         | 2.48        | 4     | 0     | 0          | 0          |

| 2202      | 2204       | 2206       | 2252       | 2254        | 2270       | 2458      | 2462      | 2506        |
|-----------|------------|------------|------------|-------------|------------|-----------|-----------|-------------|
| -1        | 0          | -1         | 0          | 0           | -1         | -1        | -1.41     | -0.5+0.866i |
| 0         | 0          | 0          | 0          | 0           | 0          | 0         | 0         | -0.5-0.866i |
| 0         | 0          | 0          | 0          | 0           | 0          | 0         | 0         | 0           |
| 1         | 0          | 1          | 0          | 0           | 1          | 1         | 1.41      | 1           |
| 1         | 2          | 2          | 2          | 3           | 3          | 2         | 2.27      | 2           |
| 2         | 2          | 2.38       | 2          | 3           | 3          | 2.38      | 3         | 3           |
| 3         | 3          | 3          | 3          | 3           | 3          | 3         | 3         | 3.5+0.866i  |
| 4         | 3          | 4.62       | 3          | 3           | 5          | 4.62      | 5.73      | 3.5-0.866i  |
| 1         | 2          | 2          | 2          | 3           | 3          | 2         | 2.27      | 2.5+0.866i  |
| 2         | 2          | 2.38       | 2          | 3           | 3          | 2.38      | 3         | 2.5-0.866i  |
| 3         | 3          | 3          | 3          | 3           | 3          | 3         | 3         | 3           |
| 4         | 3          | 4.62       | 3          | 3           | 5          | 4.62      | 5.73      | 4           |
| 0         | 0          | 0          | 0          | 0           | 0          | 0         | 0         | 0           |
| 0.268     | 0.268      | 0.325      | 0          | 0.308       | 0.551      | 0         | 0         | 1           |
| 1         | 1          | 1.46       | 0.438      | 0.643       | 1          | 1.27      | 2         | 1           |
| 3.73      | 3.73       | 4.21       | 4.56       | 5.05        | 5.45       | 4.73      | 5         | 4           |
| 0.883     | 1.95       | 2.53       | 2.09       | 3.01        | 3.69       | 2.45      | 3.38      | 2.71        |
| 3.14      | 4.4        | 5.8        | 4          | 12.3        | 12.5       | 6         | 9         | 13          |
| 13        | 11.3       | 13.3       | 12         | 12.5        | 15.8       | 13.3      | 13.7      | 13          |
| 16        | 13.3       | 22.4       | 12.9       | 14.2        | 25         | 22.3      | 32.9      | 13.3        |
| 0.889     | 2.47       | 2.97       | 2.82       | 6.29        | 6.45       | 3.11      | 4.46      | 6.79        |
| 4         | 4.4        | 6.34       | 4          | 6.48        | 9          | 6.34      | 9         | 7           |
| 8.09      | 6.95       | 9          | 6.48       | 7.36        | 9.93       | 8.46      | 9.44      | 7           |
| 20        | 17.2       | 25.7       | 17.7       | 21.9        | 31.6       | 26.1      | 36.1      | 21.2        |
| 1.14      | 4.78+1.53i | 5.44       | 4          | 6.44+6.8i   | 9.06+6.39i | 5.85      | 7.43+4.1i | 7+4.8i      |
| 6.93+3.9i | 4.78-1.53i | 7.47+3.62i | 4.82+4.56i | 6.44-6.8i   | 9.06-6.39i | 7.1+3.45i | 7.43-4.1i | 7-4.8i      |
| 6.93-3.9i | 5.72+4.33i | 7.47-3.62i | 4.82-4.56i | 8.56+1.23i  | 9.88       | 7.1-3.45i | 9         | 8+5.2i      |
| 8         | 5.72-4.33i | 11.6       | 7.35       | 8.56-1.23i  | 15         | 11.9      | 21.1      | 8-5.2i      |
| -2        | -0.093+0.9 | -1.91      | -0.702     | -0.535+0.5  | -3         | -2.1      | -3.45     | -0.5+2.6i   |
| 0         | -0.093-0.9 | 0          | 0          | -0.535-0.5  | 0          | 0         | 0         | -0.5-2.6i   |
| 0.628     | 0          | 0.275      | 0          | 0           | 0.101      | 0         | 0         | 0           |
| 6.37      | 5.19       | 7.63       | 5.7        | 7.07        | 9.9        | 8.1       | 10.4      | 7           |
| -4        | -2.39      | -5         | -2.5+1.32i | -2.19+2.26  | -5         | -5        | -7.53     | -2.5+2.6i   |
| -2        | -1.3+1.44i | -1         | -2.5-1.32i | -2.19-2.26i | -1+2i      | -1        | 0         | -2.5-2.6i   |
| 0         | -1.3-1.44i | 0          | 0          | -1.61       | -1-2i      | 0         | 0         | -1          |
| 1         | 0          | 0          | 0          | 0           | 0          | 0         | 0.531     | 0           |

|             |            |             |           |       |       |       |             |       |
|-------------|------------|-------------|-----------|-------|-------|-------|-------------|-------|
| 2510        | 2524       | 2526        | 3038      | 4370  | 4374  | 4382  | 4418        | 4420  |
| -0.662+0.5i | -1         | -1          | -1        | -1    | -1.41 | -1.73 | -0.5+0.866i | -1    |
| -0.662-0.5i | 0          | -0.618      | -1        | 0     | 0     | 0     | -0.5-0.866i | 0     |
| 0           | 0          | 0           | 0         | 0     | 0     | 0     | 0           | 0     |
| 1.32        | 1          | 1.62        | 2         | 1     | 1.41  | 1.73  | 1           | 1     |
| 2.38        | 3          | 2.75        | 3         | 1     | 1     | 1.35  | 1           | 1     |
| 3           | 3          | 3           | 3         | 1     | 1.44  | 2     | 1.25        | 1     |
| 4           | 3          | 4.45        | 6         | 1.59  | 2     | 2     | 2.88+0.745i | 2     |
| 4.62        | 5          | 5.8         | 6         | 4.41  | 5.56  | 6.65  | 2.88-0.745i | 4     |
| 2.9+0.665i  | 3          | 3           | 3         | 1     | 1     | 1.35  | 1           | 1     |
| 2.9-0.665i  | 3          | 3.43+0.369i | 4         | 1     | 1.44  | 2     | 1.77+0.793i | 1     |
| 3           | 3          | 3.43-0.369i | 4         | 1.59  | 2     | 2     | 1.77-0.793i | 2     |
| 5.21        | 5          | 6.15        | 7         | 4.41  | 5.56  | 6.65  | 3.47        | 4     |
| 0           | 0          | 0           | 0         | 0     | 0     | 0     | 0           | 0     |
| 0.412       | 0.172      | 0.313       | 1         | 0     | 0     | 0     | 1           | 0     |
| 1.41        | 1          | 1.57        | 1         | 1     | 2     | 3     | 1           | 2     |
| 5.18        | 5.83       | 6.12        | 7         | 3     | 3     | 3     | 2           | 2     |
| 3.52        | 3.62       | 4.36        | 5.09      | 0.793 | 0.875 | 1.83  | 0.778       | 0.764 |
| 13          | 13.8       | 14.7        | 15.9      | 1     | 2.3   | 4     | 1.79        | 0.938 |
| 14.8        | 14.6       | 20.6        | 36        | 2.9   | 4     | 4     | 6.93        | 5.24  |
| 25.6        | 25         | 34.3        | 36        | 21.3  | 31.8  | 44.2  | 12.5        | 17.1  |
| 6.79        | 7.04       | 7.83        | 8.38      | 0.793 | 0.875 | 1.83  | 0.873       | 0.764 |
| 9.27        | 9          | 11.7        | 16        | 1     | 2.3   | 4     | 2.91        | 0.938 |
| 9.68        | 9          | 12.5        | 16        | 2.9   | 4     | 4     | 5.06        | 5.24  |
| 31.3        | 32         | 42          | 52.6      | 21.3  | 31.8  | 44.2  | 13.2        | 17.1  |
| 8.63+5.49i  | 8.82+6.28i | 11.1+5.44i  | 13.5+2.6i | 1     | 1.03  | 2.58  | 1.11        | 1.17  |
| 8.63-5.49i  | 8.82-6.28i | 11.1-5.44i  | 13.5-2.6i | 1.14  | 2.97  | 4     | 4.03        | 1.17  |
| 12.9+2.91i  | 10.4       | 13.9        | 24        | 3.46  | 4     | 4     | 4.43+3.52i  | 6.83  |
| 12.9-2.91i  | 15         | 21.8        | 24        | 12.4  | 21    | 31.4  | 4.43-3.52i  | 6.83  |
| -1.51+1.98i | -3         | -2.64+0.34i | -4        | -1    | -2    | -3    | 0           | -1    |
| -1.51-1.98i | -0.292     | -2.64-0.34i | -4        | 0     | 0     | 0     | 0.162+1.94i | 0     |
| 0           | 0          | 0           | 0         | 0     | 0     | 0     | 0.162-1.94i | 0     |
| 10          | 10.3       | 13.3        | 17        | 5     | 7     | 9     | 3.68        | 5     |
| -3.75+1.31i | -5         | -6.56       | -6        | -5    | -7    | -9    | -2.5+1.94i  | -5    |
| -3.75-1.31i | -1+2i      | -2.44       | -6        | 0     | 0     | 0     | -2.5-1.94i  | 0     |
| 0           | -1-2i      | 0           | 0         | 0     | 0     | 0     | 0           | 0     |
| 0.506       | 0          | 1           | 3         | 1     | 2     | 3     | 1           | 1     |

|             |             |             |        |             |             |            |             |            |
|-------------|-------------|-------------|--------|-------------|-------------|------------|-------------|------------|
| 4422        | 4424        | 4426        | 4428   | 4430        | 4434        | 4436       | 4438        | 4440       |
| -0.662+0.5i | -1          | -0.662+0.5i | -1.41  | -1          | -0.662+0.5i | -1         | -1          | -1         |
| -0.662-0.5i | 0           | -0.662-0.5i | 0      | -0.618      | -0.662-0.5i | 0          | -0.618      | 0          |
| 0           | 0           | 0           | 0      | 0           | 0           | 0          | 0           | 0          |
| 1.32        | 1           | 1.32        | 1.41   | 1.62        | 1.32        | 1          | 1.62        | 1          |
| 1           | 1           | 1.2         | 1      | 1.44        | 1           | 1          | 1           | 1.59       |
| 1.59        | 1.38        | 2           | 1.47   | 2           | 1.59        | 2          | 2           | 2          |
| 3           | 2           | 2.55        | 2.65   | 3           | 3           | 2.38       | 3.38        | 2          |
| 4.41        | 3.62        | 4.25        | 4.88   | 5.56        | 4.41        | 4.62       | 5.62        | 4.41       |
| 1           | 1           | 1.73+0.564i | 1      | 2           | 1           | 1          | 1           | 1.59       |
| 2.12+0.59i  | 1.38        | 1.73-0.564i | 1.47   | 2           | 2.12+0.59i  | 2          | 2.58+0.425i | 2          |
| 2.12-0.59i  | 2           | 2           | 2.65   | 2.27        | 2.12-0.59i  | 2.38       | 2.58-0.425i | 2          |
| 4.77        | 3.62        | 4.55        | 4.88   | 5.73        | 4.77        | 4.62       | 5.83        | 4.41       |
| 0           | 0           | 0           | 0      | 0           | 0           | 0          | 0           | 0          |
| 0.382       | 1           | 1           | 0.382  | 0.586       | 0.586       | 0          | 0.268       | 0.586      |
| 2           | 1           | 2           | 2      | 2           | 1           | 1.38       | 2           | 1          |
| 2.62        | 2           | 2           | 2.62   | 3.41        | 3.41        | 3.62       | 3.73        | 3.41       |
| 0.855       | 0.706       | 1.42        | 0.841  | 1.98        | 0.892       | 0.907      | 0.917       | 1.69       |
| 2.59        | 1.92        | 3.23        | 2.27   | 3.73        | 2.47        | 2.6        | 3.84        | 3.3        |
| 8.71        | 5.21        | 6.88        | 7.86   | 9.53        | 8.77        | 9.21       | 12.6        | 6.56       |
| 22.8        | 14.2        | 21.5        | 24     | 32.8        | 22.9        | 22.3       | 32.7        | 21.5       |
| 0.91        | 0.706       | 2.43        | 0.841  | 2.67        | 0.92        | 0.914      | 0.939       | 2.28       |
| 3.62        | 1.92        | 2.82        | 2.27   | 3.59        | 3.59        | 3.47       | 6.47        | 2.5        |
| 6.79        | 5.21        | 6.07        | 7.86   | 8.48        | 6.75        | 6.27       | 7.51        | 6.25       |
| 23.7        | 14.2        | 21.7        | 24     | 33.3        | 23.7        | 24.3       | 35.1        | 22         |
| 1.05        | 1.46        | 3.28        | 1.18   | 3.35        | 1.08        | 1.07       | 1.05        | 3.33       |
| 5.85+1.83i  | 2.84        | 4.12+1.93i  | 3.18   | 5.8+1.33i   | 5.79+1.66i  | 5.64+1.95i | 7.75+2.76i  | 3.91+2.14i |
| 5.85-1.83i  | 4.85+0.795i | 4.12-1.93i  | 7.12   | 5.8-1.33i   | 5.79-1.66i  | 5.64-1.95i | 7.75-2.76i  | 3.91-2.14i |
| 12.3        | 4.85-0.795i | 11.5        | 13.5   | 21          | 12.3        | 12.6       | 21.4        | 11.9       |
| -0.787+1.6i | -1          | -0.205+1.4i | -2.19  | -1.16+1.02i | -0.861+1.6i | -2         | -1.85+0.7i  | -1.46      |
| -0.787-1.6i | 0           | -0.205-1.4i | 0      | -1.16-1.02i | -0.861-1.6i | 0          | -1.85-0.7i  | 0          |
| 0           | 1           | 0           | 0.404  | 0           | 0           | 0          | 0           | 1          |
| 6.57        | 4           | 5.41        | 6.79   | 8.33        | 6.72        | 7          | 9.7         | 5.46       |
| -4.85       | -4          | -3.36+0.54i | -6.79  | -7.19       | -5          | -5         | -6.74       | -4.83      |
| -2          | -1          | -3.36-0.54i | -0.404 | -1.6        | -2          | 0          | -1.91       | -1         |
| 0           | 0           | 0           | 0      | 0           | 0           | 0          | 0           | 0          |
| 1.85        | 1           | 1.72        | 2.19   | 2.79        | 2           | 0          | 2.64        | 0.828      |



|             |            |            |             |            |             |           |             |             |
|-------------|------------|------------|-------------|------------|-------------|-----------|-------------|-------------|
| 4442        | 4444       | 4446       | 4546        | 4548       | 4550        | 4556      | 4558        | 4562        |
| -1          | -1.41      | -1.53      | -0.63+1.09i | -1         | -0.761+0.8i | -1.41     | -0.885+0.5i | -0.761+0.8i |
| -0.618      | 0          | -0.347     | -0.63-1.09i | 0          | -0.761-0.8i | 0         | -0.885-0.5i | -0.761-0.8i |
| 0           | 0          | 0          | 0           | 0          | 0           | 0         | 0           | 0           |
| 1.62        | 1.41       | 1.88       | 1.26        | 1          | 1.52        | 1.41      | 1.77        | 1.52        |
| 1.44        | 1.62       | 1.6        | 1.3         | 2          | 1.51        | 2         | 1.83        | 1.59        |
| 2           | 2          | 2.4        | 2           | 2          | 2.48        | 2         | 3           | 2           |
| 3           | 2.73       | 3.32       | 3.35+1.03i  | 2          | 4.01+0.51i  | 3         | 3.69        | 4           |
| 5.56        | 5.65       | 6.68       | 3.35-1.03i  | 4          | 4.01-0.51i  | 5         | 5.48        | 4.41        |
| 2+1.98e-08i | 1.62       | 1.7        | 2           | 2          | 2.25+0.75i  | 2         | 2.54+0.68i  | 2           |
| 2-1.98e-08i | 2          | 2.75+0.37i | 2+1i        | 2          | 2.25-0.75i  | 2         | 2.54-0.68i  | 2.37+0.69i  |
| 2.27        | 2.73       | 2.75-0.37i | 2-1i        | 2          | 2.54        | 3         | 3           | 2.37-0.69i  |
| 5.73        | 5.65       | 6.8        | 4           | 4          | 4.95        | 5         | 5.92        | 5.27        |
| 0           | 0          | 0          | 0           | 0          | 0           | 0         | 0           | 0           |
| 0.586       | 0.268      | 0.382      | 1           | 0.382      | 1           | 0         | 0.438       | 1           |
| 2           | 2          | 2.62       | 2           | 2          | 2           | 2         | 2           | 1           |
| 3.41        | 3.73       | 4          | 2           | 2.62       | 3           | 4         | 4.56        | 4           |
| 1.98        | 2.1        | 2.49       | 1.6         | 1.7        | 2.11        | 2.24      | 3.07        | 2.22        |
| 3.73        | 3.76       | 5.17       | 4           | 5.53       | 5.89        | 6.91      | 9           | 4           |
| 9.53        | 9.82       | 12.6       | 11.8        | 6.17       | 13.1        | 9         | 13.2        | 13.3        |
| 32.8        | 32.3       | 44.8       | 13.6        | 17.6       | 22.9        | 25.9      | 33.7        | 26.4        |
| 2.67        | 2.61       | 2.86       | 3.21        | 1.7        | 3.4         | 2.24      | 4.84        | 3.55        |
| 3.59        | 3.47       | 6.47       | 4           | 5.53       | 6.45        | 6.91      | 9           | 4           |
| 8.48        | 8.18       | 9.22       | 7.79        | 6.17       | 9.2         | 9         | 9.84        | 10.2        |
| 33.3        | 33.7       | 46.5       | 16          | 17.6       | 24.9        | 25.9      | 35.3        | 28.2        |
| 3.35        | 3.34       | 3.39       | 4           | 3.81+2.82i | 5.12        | 4.6+2.79i | 7.54+3.96i  | 4           |
| 5.8+1.33i   | 5.76+1.49i | 7.9+2.78i  | 5.6         | 3.81-2.82i | 8.14+3.68i  | 4.6-2.79i | 7.54-3.96i  | 7           |
| 5.8-1.33i   | 5.76-1.49i | 7.9-2.78i  | 5.7+4.97i   | 6.69+0.88i | 8.14-3.68i  | 9         | 9           | 9.44        |
| 21          | 21.1       | 31.8       | 5.7-4.97i   | 6.69-0.88i | 10.6        | 13.8      | 20.9        | 13.6        |
| -1.16+1.02i | -3         | -3.5       | -5.55e-17+  | -0.635     | -0.761+2.6i | -2        | -1.58+2.36i | -1.13+2.54i |
| -1.16-1.02i | 0          | -0.903     | -5.55e-17-  | 0          | -0.761-2.6i | 0         | -1.58-2.36i | -1.13-2.54i |
| 0           | 0.347      | 0          | 0           | 0.295      | 0           | 0         | 0           | 0           |
| 8.33        | 8.65       | 11.4       | 5           | 5.34       | 7.52        | 8         | 10.2        | 8.27        |
| -7.19       | -7         | -8.92      | -3.34+2.83i | -5.34      | -4.19+2.09i | -8        | -7.25       | -4.36+1.29i |
| -1.6        | -0.618     | -1.64      | -3.34-2.83i | -0.295     | -4.19-2.09i | 0         | -3.07       | -4.36-1.29i |
| 0           | 0          | 0          | 0           | 0          | 0           | 0         | 0           | 0           |
| 2.79        | 1.62       | 3.56       | 1.67        | 0.635      | 2.38        | 2         | 3.32        | 2.71        |

|            |             |           |             |            |             |            |            |            |
|------------|-------------|-----------|-------------|------------|-------------|------------|------------|------------|
| 4564       | 4566        | 4572      | 4574        | 4678       | 4682        | 4686       | 4692       | 4694       |
| -1         | -0.885+0.5  | -1.41     | -1          | -1         | -1          | -1         | -0.662+0.5 | -1         |
| 0          | -0.885-0.5  | 0         | -1          | 0          | -1          | -1         | -0.662-0.5 | -0.618     |
| 0          | 0           | 0         | 0           | 0          | 1           | 1          | 0          | 0          |
| 1          | 1.77        | 1.41      | 2           | 1          | 1           | 1          | 1.32       | 1.62       |
| 2          | 1.74        | 2.27      | 2.1         | 1          | 1.38        | 1.59       | 1          | 1          |
| 2.38       | 2.48        | 3         | 3           | 2          | 1.38        | 2          | 1.68       | 2          |
| 3          | 4.18        | 3         | 4.19        | 3          | 3.62        | 4          | 3.66+0.56i | 4          |
| 4.62       | 5.6         | 5.73      | 6.71        | 4          | 3.62        | 4.41       | 3.66-0.56i | 5          |
| 2          | 2.46+0.18i  | 2.27      | 3           | 1          | 1.38        | 1.59       | 1          | 1          |
| 2.38       | 2.46-0.18i  | 3         | 3+9.44e-09  | 2          | 1.38        | 2          | 2.34+0.56i | 2.59       |
| 3          | 3           | 3         | 3-9.44e-09  | 3          | 3.62        | 4          | 2.34-0.56i | 3          |
| 4.62       | 6.08        | 5.73      | 7           | 4          | 3.62        | 4.41       | 4.32       | 5.41       |
| 0          | 0           | 0         | 0           | 0          | 0.382       | 0.268      | 0          | 0          |
| 0.325      | 0.697       | 0         | 0.319       | 1          | 1           | 1          | 1          | 0.586      |
| 1.46       | 2           | 2         | 2.36        | 1          | 1           | 1          | 1          | 2          |
| 4.21       | 4.3         | 5         | 5.32        | 3          | 2.62        | 3.73       | 3          | 3.41       |
| 2.53       | 2.69        | 3.38      | 3.91        | 0.824      | 1.54        | 2.14       | 0.849      | 0.891      |
| 5.8        | 6.14        | 9         | 9           | 3.42       | 2.29        | 4.24       | 2.99       | 4.09       |
| 13.3       | 18.1        | 13.7      | 19.6        | 12.8       | 10.9        | 16         | 12.6       | 16.7       |
| 22.4       | 34.1        | 32.9      | 45.5        | 16         | 16.3        | 21.6       | 16.6       | 26.4       |
| 2.97       | 3.7         | 4.46      | 5.97        | 0.876      | 1.54        | 2.46       | 0.882      | 0.924      |
| 6.34       | 7.09        | 9         | 9           | 4          | 2.29        | 4          | 4.43       | 5.76       |
| 9          | 12.5        | 9.44      | 13.4        | 8.28       | 10.9        | 13         | 8.22       | 10.9       |
| 25.7       | 37.8        | 36.1      | 49.6        | 19.8       | 16.3        | 24.6       | 19.5       | 30.4       |
| 5.44       | 4.66        | 7.43+4.1i | 9           | 1.09       | 3.18+0.06i  | 3.31       | 1.12       | 1.06       |
| 7.47+3.62i | 10.5+1.65i  | 7.43-4.1i | 10.4+2.71i  | 6.95+4.18i | 3.18-0.06i  | 8          | 7.2+4.12i  | 10.5+1.77i |
| 7.47-3.62i | 10.5-1.65i  | 9         | 10.4-2.71i  | 6.95-4.18i | 7.32+2.86i  | 10.3+3.4i  | 7.2-4.12i  | 10.5-1.77i |
| 11.6       | 21.4        | 21.1      | 32.2        | 8          | 7.32-2.86i  | 10.3-3.4i  | 7.48       | 14         |
| -1.91      | -1.99+1.96  | -3.45     | -2.9+0.839  | -2         | -1.27+0.54  | -2         | -0.629+1.5 | -2         |
| 0          | -1.99-1.96i | 0         | -2.9-0.839i | 0          | -1.27-0.54i | -1.56      | -0.629-1.5 | -1.39      |
| 0.275      | 0           | 0         | 0           | 1          | 2.76        | 2.56       | 0          | 0          |
| 7.63       | 11          | 10.4      | 13.8        | 6          | 4.77        | 7          | 6.26       | 9.39       |
| -5         | -6          | -7.53     | -8.62       | -4         | -4.77       | -4.61      | -3.5+1.66i | -6         |
| -1         | -4.27       | 0         | -3.41       | -1         | -2.76       | -4         | -3.5-1.66i | -2.65      |
| 0          | 0           | 0         | 0           | 0          | 1.27+0.54i  | 1.31+1.15i | 0          | 0          |
| 0          | 3.27        | 0.531     | 4.02        | 0          | 1.27-0.54i  | 1.31-1.15i | 2          | 2.65       |

|        |             |             |                                                                 |             |                       |                     |             |             |
|--------|-------------|-------------|-----------------------------------------------------------------|-------------|-----------------------|---------------------|-------------|-------------|
| 4698   | 4700        | 4702        | 4740                                                            | 4742        | 4748                  | 4750                | 4758        | 4764        |
| -1.62  | -1.01+0.51i | -1.25       | -1                                                              | -0.724      | -1.27                 | -1                  | -0.618      | -1          |
| -0.618 | -1.01-0.51i | -1          | 5.55e-17+1.0-0.248+1.0-2.92e-17+0.233+0.7-0.5+0.866i-0.233+0.7i |             |                       |                     |             |             |
| 0.618  | 0.525       | 0.445       | 5.55e-17-1-0.248-1.0-2.92e-17-0.233-0.7-0.5-0.866i-0.233-0.7i   |             |                       |                     |             |             |
| 1.62   | 1.49        | 1.8         | 1                                                               | 1.22        | 1.27                  | 1.47                | 1.62        | 1.47        |
| 1.38   | 1.45        | 1.59        | 1                                                               | 1.25        | 1.28                  | 1.59                | 1.38        | 1.45        |
| 1.7    | 2           | 2.27        | 2+1i                                                            | 2.88+0.745i | 2.3+0.755i            | 3                   | 2.38        | 3+0.644i    |
| 3.62   | 4.27+0.564i | 4.41        | 2-1i                                                            | 2.88-0.745i | 2.3-0.755i            | 3                   | 3.62        | 3-0.644i    |
| 5.3    | 4.27-0.564i | 5.73        | 3                                                               | 3           | 4.11                  | 4.41                | 4.62        | 4.55        |
| 1.38   | 1.75        | 1.68        | 1                                                               | 1.52        | 1.28                  | 1.71                | 1.7         | 2           |
| 1.7    | 2           | 2.42        | 2+1i                                                            | 2.29+1i     | 2.3+0.755i            | 2.69+0.85i          | 2.5+0.866i  | 2.58+0.606i |
| 3.62   | 3.45        | 3.87        | 2-1i                                                            | 2.29-1i     | 2.3-0.755i            | 2.69-0.85i          | 2.5-0.866i  | 2.58-0.606i |
| 5.3    | 4.8         | 6.03        | 3                                                               | 3.9         | 4.11                  | 4.9                 | 5.3         | 4.84        |
| 0.382  | 0.198       | 0.173       | 1                                                               | 0.382       | 0.382                 | 0.268               | 0.382       | 0.198       |
| 0.382  | 1           | 0.662       | 1                                                               | 1           | 1                     | 1                   | 0.382       | 1           |
| 2.62   | 1.55        | 2.21        | 1                                                               | 1           | 1                     | 1                   | 2.62        | 1.55        |
| 2.62   | 3.25        | 3.96        | 1                                                               | 2.62        | 2.62                  | 3.73                | 2.62        | 3.25        |
| 1.91   | 2.06        | 2.45        | 1                                                               | 1.52        | 1.52                  | 2.24                | 1.91        | 2.03        |
| 2.88   | 4           | 5.13        | 5                                                               | 4.73        | 5.88                  | 6.01                | 4.58        | 6.42        |
| 13.1   | 16.5        | 19.4        | 5                                                               | 10.9        | 6.16                  | 12.9                | 13.1        | 13.1        |
| 28.1   | 21.4        | 34          | 9                                                               | 13.8        | 17.4                  | 22.9                | 26.4        | 22.4        |
| 1.91   | 2.48        | 2.76        | 1                                                               | 2.27        | 1.52                  | 2.82                | 2.88        | 3.1         |
| 2.88   | 4.35        | 5.79        | 5                                                               | 4.89        | 5.88                  | 6.94                | 4.81        | 6.5         |
| 13.1   | 12.7        | 15.1        | 5                                                               | 7.57        | 6.16                  | 9.12                | 10.2        | 9.07        |
| 28.1   | 24.4        | 37.3        | 9                                                               | 16.3        | 17.4                  | 25.1                | 28.1        | 25.3        |
| 3.28   | 3.29        | 3.37        | 3+4i                                                            | 3.17        | 4.6+2.52i             | 4.58                | 3.28        | 4.38        |
| 3.28   | 7.62        | 8.77        | 3-4i                                                            | 5.62+5.18i  | 4.6-2.52i             | 8+4.08i             | 8.5+2.18i   | 8.05+4.33i  |
| 13.7   | 10.5+3.69i  | 14          | 3                                                               | 5.62-5.18i  | 5.9+0.332i            | 8-4.08i             | 8.5-2.18i   | 8.05-4.33i  |
| 13.7   | 10.5-3.69i  | 20.8        | 3                                                               | 6.59        | 5.9-0.332i            | 11.4                | 13.7        | 11.5        |
| -2.79  | -1.5+1.6i   | -2.52+0.64i | -1                                                              | -1.11       | -1.72                 | -1.7                | -1.11       | -2.07       |
| -1.11  | -1.5-1.6i   | -2.52-0.64i | 1+2i                                                            | 0.614+2.54i | 0.666+1.7i            | 0.0599+2.2-0.5+2.6i | 0.285+2.08i |             |
| 1.79   | 1.65        | 1.3         | 1-2i                                                            | 0.614-2.54i | 0.666-1.7i            | 0.0599-2.2-0.5-2.6i | 0.285-2.08i |             |
| 8.11   | 7.34        | 10.7        | 3                                                               | 4.89        | 5.38                  | 7.58                | 8.11        | 7.5         |
| -8.11  | -4.6+2.03i  | -7.43       | -3                                                              | -2.29+2.41i | -5.38                 | -4.64               | -4.62       | -4.74       |
| -1.79  | -4.6-2.03i  | -3.8        | -1+2i                                                           | -2.29-2.41i | -0.666+1.7-1.88+1.46i |                     | -2.38       | -1.63+1.97i |
| 1.11   | 0.955       | 1           | -1-2i                                                           | -1.95       | -0.666-1.7-1.88-1.46i |                     | -1.79       | -1.63-1.97i |
| 2.79   | 2.24        | 3.23        | 1                                                               | 1.53        | 1.72                  | 2.39                | 2.79        | 2           |

|             |           |             |       |             |       |             |             |        |
|-------------|-----------|-------------|-------|-------------|-------|-------------|-------------|--------|
| 4766        | 4812      | 4814        | 4830  | 4946        | 4950  | 4952        | 4954        | 4958   |
| -1          | -1.41     | -1          | -1    | -1          | -1    | -1          | -1.25       | -1.48  |
| -0.42+0.60i | 0         | -0.618      | -1    | -0.618      | -1    | -1          | -1          | -1     |
| -0.42-0.60i | 0         | 0           | 0     | 0           | 0     | 1+7.34e-09i | 0.445       | 0.311  |
| 1.84        | 1.41      | 1.62        | 2     | 1.62        | 2     | 1-7.34e-09i | 1.8         | 2.17   |
| 1.62        | 1.59      | 1.85        | 2     | 1           | 1     | 1.59        | 1.59        | 1.65   |
| 2.73        | 3         | 3           | 3     | 2           | 2.27  | 2           | 2.27        | 2.6    |
| 4           | 3         | 4.57+0.369i | 5     | 4           | 5     | 4           | 4.41        | 5      |
| 5.65        | 4.41      | 4.57-0.369i | 6     | 5           | 5.73  | 4.41        | 5.73        | 6.74   |
| 2           | 1.59      | 2.2         | 2.44  | 1           | 1     | 1.59        | 1.68        | 1.73   |
| 2.95+0.565i | 3         | 3           | 3     | 2.59        | 3     | 2           | 2.42        | 3      |
| 2.95-0.565i | 3         | 3.55        | 4     | 3           | 3.59  | 4           | 3.87        | 4.14   |
| 6.1         | 4.41      | 5.25        | 6.56  | 5.41        | 6.41  | 4.41        | 6.03        | 7.13   |
| 0.173       | 0         | 0           | 0     | 0           | 0     | 0.268       | 0.173       | 0.0968 |
| 0.662       | 1         | 1           | 0.764 | 0.468       | 1     | 1           | 0.662       | 1      |
| 2.21        | 1         | 1.27        | 2     | 1.65        | 1.59  | 1           | 2.21        | 2.19   |
| 3.96        | 4         | 4.73        | 5.24  | 3.88        | 4.41  | 3.73        | 3.96        | 4.71   |
| 2.54        | 2.38      | 3.18        | 3.82  | 0.912       | 0.93  | 2.14        | 2.45        | 2.73   |
| 6.43        | 6.46      | 8.33        | 8.68  | 3.97        | 5.39  | 4.24        | 5.13        | 6.78   |
| 18          | 12.5      | 22.1        | 26.2  | 16.8        | 25    | 16          | 19.4        | 25     |
| 34.1        | 20.6      | 23.4        | 37.3  | 26.3        | 33.7  | 21.6        | 34          | 45.5   |
| 3.53        | 2.38      | 4.48        | 5.79  | 0.925       | 0.948 | 2.46        | 2.76        | 2.98   |
| 7.29        | 6.46      | 7.51        | 8     | 5.79        | 9     | 4           | 5.79        | 9      |
| 12.5        | 12.5      | 15          | 18    | 10.8        | 13.4  | 13          | 15.1        | 17.1   |
| 37.7        | 20.6      | 30          | 44.2  | 30.5        | 41.7  | 24.6        | 37.3        | 50.9   |
| 4.29        | 6.5+2.6i  | 8.88+0.704i | 8     | 1.08        | 1.05  | 3.31        | 3.37        | 3.44   |
| 10.6+2.52i  | 6.5-2.6i  | 8.88-0.704i | 9.68  | 10.5+1.32i  | 13    | 8           | 8.77        | 13.4   |
| 10.6-2.52i  | 8.5+2.96i | 12.6+4.71i  | 20    | 10.5-1.32i  | 15    | 10.3+3.4i   | 14          | 15     |
| 21.4        | 8.5-2.96i | 12.6-4.71i  | 22.3  | 13.9        | 22    | 10.3-3.4i   | 20.8        | 32.2   |
| -2.36       | -2        | -1.3+0.536i | -3    | -1.75+0.53i | -3    | -2          | -2.52+0.64i | -4.26  |
| -0.784+1.9i | 0         | -1.3-0.536i | -2.39 | -1.75-0.53i | -3    | -1.56       | -2.52-0.64i | -3     |
| -0.784-1.9i | 1         | 0           | 0     | 0           | 0     | 2.56        | 1.3         | 0.83   |
| 10.9        | 7         | 9.6         | 13.4  | 9.51        | 13    | 7           | 10.7        | 14.4   |
| -6.71       | -7        | -5          | -7    | -5.93       | -6.29 | -4.61       | -7.43       | -8.61  |
| -1.89+0.82i | -1        | -4.46       | -5    | -2.94       | -5    | -4          | -3.8        | -5     |
| -1.89-0.82i | 0         | 0           | 0     | 0           | 0     | 1.31+1.15i  | 1           | 0.683  |
| 3.49        | 2         | 2.46        | 4     | 2.87        | 4.29  | 1.31-1.15i  | 3.23        | 4.93   |

| 4994         | 4998        | 5002        | 5004                 | 5006        | 5010        | 5012        | 5014        | 5016       |
|--------------|-------------|-------------|----------------------|-------------|-------------|-------------|-------------|------------|
| -0.5+0.866i  | -1          | -0.662+0.5i | -1.55                | -1.35       | -0.662+0.5i | -1          | -1          | -1         |
| -0.5-0.866i  | -0.233+0.7i | -0.662-0.5i | -5.38e-17+0.183+0.6i | -0.662-0.5i | -0.233+0.7i | -0.42+0.60i |             | 0          |
| 0            | -0.233-0.7i | 0           | -5.38e-17-0.183-0.6i | 0           | -0.233-0.7i | -0.42-0.60i |             | 0          |
| 1            | 1.47        | 1.32        | 1.55                 | 1.71        | 1.32        | 1.47        | 1.84        | 1          |
| 1.53         | 1.45        | 2           | 1.55                 | 1.85        | 1.75        | 1.59        | 1.62        | 2          |
| 2            | 3+0.644i    | 2           | 2.7+0.495i           | 3.24+0.517i | 2           | 3+3.34e-08i | 2.73        | 2.38       |
| 3.23+0.793i  | 3-0.644i    | 4           | 2.7-0.495i           | 3.24-0.517i | 3.45        | 3-3.34e-08i | 4           | 3          |
| 3.23-0.793i  | 4.55        | 4           | 5.05                 | 5.66        | 4.8         | 4.41        | 5.65        | 4.62       |
| 2            | 2           | 2           | 1.55                 | 2.19        | 2           | 1.71        | 2           | 2          |
| 2.12+0.745i  | 2.58+0.606i | 2.58+0.606i | 2.7+0.495i           | 2.97+0.655i | 2.43+0.369i | 2.69+0.851i | 2.95+0.565i | 2.38       |
| 2.12-0.745i  | 2.58-0.606i | 2.58-0.606i | 2.7-0.495i           | 2.97-0.655i | 2.43-0.369i | 2.69-0.851i | 2.95-0.565i | 3          |
| 3.75         | 4.84        | 4.84        | 5.05                 | 5.86        | 5.15        | 4.9         | 6.1         | 4.62       |
| 0            | 0.198       | 0           | 0.382                | 0.173       | 0           | 0.268       | 0.173       | 0          |
| 1            | 1           | 0.586       | 0.382                | 0.662       | 0.468       | 1           | 0.662       | 0.468      |
| 1            | 1.55        | 2           | 2.62                 | 2.21        | 1.65        | 1           | 2.21        | 1.65       |
| 3            | 3.25        | 3.41        | 2.62                 | 3.96        | 3.88        | 3.73        | 3.96        | 3.88       |
| 1.7          | 2.03        | 2.25        | 2.12                 | 3.06        | 2.19        | 2.24        | 2.54        | 2.35       |
| 4.42         | 6.42        | 6.27        | 6.7                  | 9.5         | 4.35        | 6.01        | 6.43        | 6.49       |
| 11.8         | 13.1        | 12.8        | 9.61                 | 13.2        | 13.7        | 12.9        | 18          | 12.8       |
| 13.1         | 22.4        | 22.6        | 25.6                 | 33.2        | 25.7        | 22.9        | 34.1        | 22.4       |
| 2.75         | 3.1         | 3.06        | 2.12                 | 4.39        | 3.19        | 2.82        | 3.53        | 2.97       |
| 4.4          | 6.5         | 6.96        | 6.7                  | 9.39        | 4.35        | 6.94        | 7.29        | 6.47       |
| 7.15         | 9.07        | 8.54        | 9.61                 | 9.67        | 9.61        | 9.12        | 12.5        | 8.79       |
| 16.7         | 25.3        | 25.4        | 25.6                 | 35.6        | 28.9        | 25.1        | 37.7        | 25.8       |
| 4.45+1.56i   | 4.38        | 4.78        | 5.76+2.12i           | 7           | 4.6         | 4.58        | 4.29        | 4.76       |
| 4.45-1.56i   | 8.05+4.33i  | 7.67+4.22i  | 5.76-2.12i           | 8.47+4.41i  | 5.47        | 8+4.08i     | 10.6+2.52i  | 7.49+4.31i |
| 6.05+4.63i   | 8.05-4.33i  | 7.67-4.22i  | 6.71                 | 8.47-4.41i  | 11.4        | 8-4.08i     | 10.6-2.52i  | 7.49-4.31i |
| 6.05-4.63i   | 11.5        | 11.9        | 13.8                 | 21.1        | 12.5        | 11.4        | 21.4        | 12.3       |
| -0.0659+2.1i | -2.07       | -0.84+1.79i | -2.69                | -3.07       | -1.24+1.6i  | -1.7        | -2.36       | -2.16      |
| -0.0659-2.1i | 0.285+2.08i | -0.84-1.79i | 0.489+1.6i           | -5.12e-05+  | -1.24-1.6i  | 0.0599+2.2i | -0.784+1.9i | 0          |
| 0            | 0.285-2.08i | 0           | 0.489-1.6i           | -5.12e-05-  | 0           | 0.0599-2.2i | -0.784-1.9i | 0.613      |
| 5.13         | 7.5         | 7.68        | 7.71                 | 10.1        | 8.49        | 7.58        | 10.9        | 7.55       |
| -2.74+2.26i  | -4.74       | -3.81+1.68i | -7.71                | -7.32       | -4.82       | -4.64       | -6.71       | -5         |
| -2.74-2.26i  | -1.63+1.97i | -3.81-1.68i | -0.489+1.6i          | -1.33+1.86i | -2.34       | -1.88+1.46i | -1.89+0.82i | -0.5+1.32i |
| 0            | -1.63-1.97i | 0           | -0.489-1.6i          | -1.33-1.86i | 0           | -1.88-1.46i | -1.89-0.82i | -0.5-1.32i |
| 0.476        | 2           | 1.62        | 2.69                 | 2.97        | 1.15        | 2.39        | 3.49        | 0          |

|             |             |             |             |             |             |             |             |             |
|-------------|-------------|-------------|-------------|-------------|-------------|-------------|-------------|-------------|
| 5018        | 5020        | 5022        | 5058        | 5062        | 5064        | 5066        | 5068        | 5070        |
| -1          | -1.35       | -1.45       | -0.761+0.8  | -1          | -1          | -1.03+0.73  | -1.73       | -1          |
| -0.618      | -0.183+0.6  | -0.302+0.4  | -0.761-0.8i | -0.42+0.60  | -1          | -1.03-0.73i | 0           | -1          |
| 0           | -0.183-0.6i | -0.302-0.4i | 0           | -0.42-0.60i | 1           | 0.372       | 0           | 0           |
| 1.62        | 1.71        | 2.05        | 1.52        | 1.84        | 1           | 1.68        | 1.73        | 2           |
| 2           | 1.85        | 2           | 1.51        | 1.59        | 2+1.83e-08i | 1.83        | 1.83        | 2           |
| 2.27        | 3.24+0.517i | 3.27        | 2.48        | 3           | 2-1.83e-08  | 2.76        | 3           | 3.38        |
| 4           | 3.24-0.517i | 4           | 4.01+0.517i | 4.41        | 4+3.74e-08i | 4.7+0.785i  | 3.69        | 5           |
| 5.73        | 5.66        | 6.73        | 4.01-0.513i | 5           | 4-3.74e-08  | 4.7-0.785i  | 5.48        | 5.62        |
| 2           | 2.19        | 2.4         | 2.25+0.75i  | 2.27        | 2+1.83e-08i | 2.47+0.557i | 1.83        | 2.7         |
| 3+2.28e-08i | 2.97+0.657i | 3.29+0.577i | 2.25-0.75i  | 3           | 2-1.83e-08  | 2.47-0.552i | 3           | 3           |
| 3-2.28e-08i | 2.97-0.655i | 3.29-0.573i | 2.54        | 3           | 4+3.74e-08i | 3.72        | 3.69        | 4           |
| 6           | 5.86        | 7.02        | 4.95        | 5.73        | 4-3.74e-08  | 5.35        | 5.48        | 6.3         |
| 0           | 0.173       | 0.0968      | 0           | 0.121       | 0.382       | 0.121       | 0           | 0           |
| 1           | 0.662       | 1           | 1           | 1           | 0.382       | 1           | 0.382       | 0.657       |
| 1.59        | 2.21        | 2.19        | 2           | 2.35        | 2.62        | 2.35        | 2.62        | 2.53        |
| 4.41        | 3.96        | 4.71        | 3           | 3.53        | 2.62        | 3.53        | 4           | 4.81        |
| 2.68        | 3.06        | 3.73        | 2.11        | 2.47        | 2.44        | 3.07        | 3.06        | 3.87        |
| 6.62        | 9.5         | 9.44        | 5.89        | 7.6         | 6.56        | 8.27        | 9.22        | 11.2        |
| 18.2        | 13.2        | 19.3        | 13.1        | 21.1        | 12.5        | 22.2        | 14.4        | 23.8        |
| 33.5        | 33.2        | 45.5        | 22.9        | 27.8        | 20.5        | 23.4        | 30.3        | 35.2        |
| 3.51        | 4.39        | 5.66        | 3.4         | 3.46        | 2.44        | 4.74        | 3.06        | 5.47        |
| 7.28        | 9.39        | 9.44        | 6.45        | 9           | 6.56        | 7.75        | 9.22        | 11.1        |
| 11.9        | 9.67        | 13.4        | 9.2         | 13.2        | 12.5        | 14.8        | 14.4        | 17          |
| 38.3        | 35.6        | 49.5        | 24.9        | 33.3        | 20.5        | 29.7        | 30.3        | 40.5        |
| 4.43        | 7           | 7.19        | 5.12        | 4.55        | 7.5+2.78i   | 8.27        | 7.38+2.71i  | 9.25        |
| 10.4+2.86i  | 8.47+4.41i  | 11.3+3.89i  | 8.14+3.68i  | 13.1+4.24i  | 7.5-2.78i   | 9.73        | 7.38-2.71i  | 14.6+1.22i  |
| 10.4-2.86i  | 8.47-4.41i  | 11.3-3.89i  | 8.14-3.68i  | 13.1-4.24i  | 7.5+2.78i   | 12.5+5.03i  | 14.1+0.077i | 14.6-1.22i  |
| 21.7        | 21.1        | 32.2        | 10.6        | 14.2        | 7.5-2.78i   | 12.5-5.03i  | 14.1-0.072  | 19.6        |
| -3          | -3.07       | -4.37       | -0.761+2.6  | -2.36       | -1.5+1.32i  | -1.85+2.72  | -3.05       | -2.33+1.62  |
| -1.16       | -5.12e-05+  | -0.628+1.6  | -0.761-2.6i | -0.558+2.1  | -1.5-1.32i  | -1.85-2.72i | 0           | -2.33-1.62i |
| 0           | -5.12e-05-  | -0.628-1.6i | 0           | -0.558-2.1i | 2.44        | 1.24        | 0.373       | 0           |
| 11.2        | 10.1        | 13.6        | 7.52        | 10.5        | 6.56        | 9.45        | 9.67        | 12.7        |
| -6.4        | -7.32       | -8.73       | -4.19+2.09  | -6.23       | -6.56       | -5.37+2.67  | -9.67       | -8.24       |
| -2.52       | -1.33+1.86  | -1.72+1.36  | -4.19-2.09i | -2.12+0.61  | -2.44       | -5.37-2.67i | -0.373      | -3.76       |
| 0           | -1.33-1.86i | -1.72-1.36i | 0           | -2.12-0.61i | 1.5+1.32i   | 1.33        | 0           | 0           |
| 1.92        | 2.97        | 4.18        | 2.38        | 3.46        | 1.5-1.32i   | 2.41        | 3.05        | 4           |

|             |             |             |               |             |             |       |             |             |
|-------------|-------------|-------------|---------------|-------------|-------------|-------|-------------|-------------|
| 5074        | 5076        | 5078        | 5080          | 5082        | 5084        | 5086  | 6342        | 6348        |
| -0.885+0.5i | -1.35       | -1          | -1+4.84e-08   | -1.14+0.48i | -1.53       | -1.3  | -0.475      | -0.662+0.5i |
| -0.885-0.5i | -0.183+0.6i | -0.574+0.3i | -1-4.84e-08   | -1.14-0.48i | -0.347      | -1    | -0.46+1.14i | -0.662-0.5i |
| 0           | -0.183-0.6i | -0.574-0.3i | 1+1.37e-08    | 0.337       | 0           | 0     | -0.46-1.14i | 0           |
| 1.77        | 1.71        | 2.15        | 1-1.37e-08    | 1.94        | 1.88        | 2.3   | 1.4         | 1.32        |
| 1.74        | 1.81        | 1.75        | 2.38+8.04e-08 | 2.1         | 2.15        | 2.21  | 1.6         | 2           |
| 2.48        | 2.71        | 2.89        | 2.38-8.04e-08 | 2.82        | 3.23        | 3.38  | 3.46+1.14i  | 2           |
| 4.18        | 4.29        | 5.52        | 4.62          | 5.18        | 4.77        | 5.62  | 3.46-1.14i  | 4           |
| 5.6         | 5.19        | 5.84        | 4.62          | 5.9         | 5.85        | 6.79  | 3.47        | 4           |
| 2.46+0.183i | 1.85        | 2.09        | 2.38+7.68e-08 | 2.63+0.318i | 2.32        | 2.67  | 2.53        | 2           |
| 2.46-0.183i | 3.24+0.517i | 3.42        | 2.38-7.68e-08 | 2.63-0.318i | 3.46        | 3.48  | 2.54+1.14i  | 2.58+0.606i |
| 3           | 3.24-0.517i | 3.68        | 4.62          | 4.2         | 4           | 4.42  | 2.54-1.14i  | 2.58-0.606i |
| 6.08        | 5.66        | 6.81        | 4.62          | 6.53        | 6.21        | 7.43  | 4.4         | 4.84        |
| 0           | 0.228       | 0.087       | 0.228         | 0.087       | 0           | 0     | 0.198       | 0           |
| 0.697       | 0.544       | 1.42        | 0.544         | 1.42        | 0.486       | 1.21  | 1           | 0.438       |
| 2           | 1.84        | 1.68        | 1.84          | 1.68        | 2.43        | 2     | 1.55        | 1           |
| 4.3         | 4.39        | 4.81        | 4.39          | 4.81        | 5.09        | 5.79  | 3.25        | 4.56        |
| 2.69        | 2.78        | 2.93        | 3.38          | 3.84        | 4.04        | 4.65  | 2.39        | 2.37        |
| 6.14        | 7.26        | 8.19        | 8.54          | 8.76        | 11.2        | 11.7  | 12.3        | 5.9         |
| 18.1        | 21.3        | 30.1        | 22.1          | 26.1        | 23.9        | 32.3  | 13.5        | 12.7        |
| 34.1        | 27.6        | 36.8        | 22.9          | 37.3        | 34.9        | 46.4  | 13.8        | 23          |
| 3.7         | 3.15        | 3.7         | 4.38          | 5.86        | 5.25        | 6.64  | 6.28        | 3.14        |
| 7.09        | 9.27        | 11.2        | 7.35          | 8.01        | 11          | 12.3  | 7.47        | 6.5         |
| 12.5        | 13          | 16.7        | 15            | 18          | 17          | 20.4  | 7.65        | 8.88        |
| 37.8        | 33.5        | 46.4        | 30.2          | 44.2        | 40.7        | 55.6  | 20.6        | 25.5        |
| 4.66        | 4.69        | 4.37        | 8.64          | 7.99        | 9.56        | 8.69  | 7.15+7.15i  | 6.13        |
| 10.5+1.65i  | 13.2+3.8i   | 14.1        | 9.97          | 9.9         | 14.3+0.479i | 14.5  | 7.15-7.15i  | 7.27+3.13i  |
| 10.5-1.65i  | 13.2-3.8i   | 21.4        | 12.2+4.61i    | 19.7        | 14.3-0.479i | 21.1  | 7.85+0.82i  | 7.27-3.13i  |
| 21.4        | 13.9        | 22.2        | 12.2-4.61i    | 22.4        | 19.9        | 32.7  | 7.85-0.82i  | 11.3        |
| -1.99+1.96i | -3.07       | -3.04       | -2.26+0.75i   | -3.17+1.78i | -3.72       | -4    | -1.17       | -0.952+1.7i |
| -1.99-1.96i | -0.26+1.84i | -1.66+1.17i | -2.26-0.75i   | -3.17-1.78i | -0.973      | -3.76 | 0.187+3.29i | -0.952-1.7i |
| 0           | -0.26-1.84i | -1.66-1.17i | 2.32          | 1.1         | 0           | 0     | 0.187-3.29i | 0           |
| 11          | 10.6        | 14.4        | 9.2           | 13.2        | 12.7        | 16.8  | 6.79        | 7.9         |
| -6          | -6.76       | -6.05+0.63i | -5.75         | -6.26+1.41i | -8.66       | -8.37 | -3.11+3.48i | -4          |
| -4.27       | -1.76+1.35i | -6.05-0.63i | -3.8          | -6.26-1.41i | -2.57       | -6    | -3.11-3.48i | -3.83       |
| 0           | -1.76-1.35i | -0.884      | 1.28+1.98i    | 1.42        | 0           | 0     | -1.73       | 0           |
| 3.27        | 3.28        | 4.98        | 1.28-1.98i    | 3.1         | 3.23        | 5.37  | 1.96        | 1.83        |

|                      |                       |                       |             |             |             |           |            |             |
|----------------------|-----------------------|-----------------------|-------------|-------------|-------------|-----------|------------|-------------|
| 6350                 | 6356                  | 6358                  | 6364        | 6366        | 6550        | 6552      | 6554       | 6558        |
| -0.618               | -0.5+0.866i           | -0.618                | -0.662+0.5i | -1          | -0.885+0.5i | -1        | -1         | -1          |
| -0.5+0.866i          | -0.5-0.866i           | -0.5+0.866i           | -0.662-0.5i | -0.42+0.60i | -0.885-0.5i | 0         | -0.618     | -1          |
| -0.5-0.866i          | 0                     | -0.5-0.866i           | 0           | -0.42-0.60i | 0           | 0         | 0          | 0           |
| 1.62                 | 1                     | 1.62                  | 1.32        | 1.84        | 1.77        | 1         | 1.62       | 2           |
| 2                    | 2                     | 1.89                  | 2.38        | 2.27        | 1.83        | 2         | 2          | 2.1         |
| 4+9.2e-06i           | 3                     | 3.7+0.755i            | 3           | 4           | 3           | 2         | 2.27       | 3           |
| 4-9.2e-06i           | 3.5+0.866i            | 3.7-0.755i            | 4           | 4           | 3.69        | 3         | 4          | 4.19        |
| 4                    | 3.5-0.866i            | 4.72                  | 4.62        | 5.73        | 5.48        | 5         | 5.73       | 6.71        |
| 2.59                 | 2.5+0.866i            | 2.82+0.903i           | 2.9+0.665i  | 3           | 2.54+0.688i | 2         | 2          | 3+1.18e-08i |
| 3+1i                 | 2.5-0.866i            | 2.82-0.903i           | 2.9-0.665i  | 3.37+0.692i | 2.54-0.688i | 2         | 3          | 3-1.18e-08i |
| 3-1i                 | 3                     | 3                     | 3           | 3.37-0.692i | 3           | 3         | 3          | 3           |
| 5.41                 | 4                     | 5.36                  | 5.21        | 6.27        | 5.92        | 5         | 6          | 7           |
| 0.308                | 0                     | 0.139                 | 0           | 0.18        | 0           | 0         | 0          | 0           |
| 0.643                | 1                     | 1                     | 0.412       | 0.599       | 0.438       | 0         | 0.238      | 0.319       |
| 1                    | 1                     | 1.75                  | 1.41        | 1.67        | 2           | 1         | 1.64       | 2.36        |
| 5.05                 | 4                     | 4.11                  | 5.18        | 5.55        | 4.56        | 5         | 5.12       | 5.32        |
| 3.37                 | 2.71                  | 3.19                  | 3.52        | 4.22        | 3.07        | 2.48      | 2.81       | 3.91        |
| 12.5                 | 13                    | 12.9                  | 13          | 14          | 9           | 4         | 6.23       | 9           |
| 14.7                 | 13                    | 15.2                  | 14.8        | 21.2        | 13.2        | 14.5      | 18.4       | 19.6        |
| 26.4                 | 13.3                  | 25.6                  | 25.6        | 34.6        | 33.7        | 25        | 33.5       | 45.5        |
| 6.41                 | 6.79                  | 6.88                  | 6.79        | 7.69        | 4.84        | 3.38      | 3.59       | 5.97        |
| 10                   | 7                     | 9.38                  | 9.27        | 11.9        | 9           | 4         | 7.09       | 9           |
| 10                   | 7                     | 10                    | 9.68        | 13          | 9.84        | 9         | 11.9       | 13.4        |
| 30.6                 | 21.2                  | 30.7                  | 31.3        | 41.4        | 35.3        | 29.6      | 38.4       | 49.6        |
| 9.49+6.06i           | 7+4.8i                | 9.86+5.52i            | 8.63+5.49i  | 11.8+5.21i  | 7.54+3.96i  | 4         | 4.8        | 9           |
| 9.49-6.06i           | 7-4.8i                | 9.86-5.52i            | 8.63-5.49i  | 11.8-5.21i  | 7.54-3.96i  | 7.5+1.94i | 10.2+1.74i | 10.4+2.71i  |
| 10.3                 | 8+5.2i                | 11.6+2.18i            | 12.9+2.91i  | 12.8        | 9           | 7.5-1.94i | 10.2-1.74i | 10.4-2.71i  |
| 13.7                 | 8-5.2i                | 11.6-2.18i            | 12.9-2.91i  | 21.5        | 20.9        | 15        | 21.7       | 32.2        |
| -1.6                 | -0.5+2.6i             | -1.68                 | -1.51+1.98i | -3          | -1.58+2.36i | -3        | -2.86      | -2.9+0.839i |
| -0.621+2.9-0.5-2.6i  | -0.514+2.8-1.51-1.98i | -0.99+2.17-1.58-2.36i |             |             |             | 0         | -1.56      | -2.9-0.839i |
| -0.621-2.9i          | 0                     | -0.514-2.8i           | 0           | -0.99-2.17i | 0           | 0         | 0          | 0           |
| 9.84                 | 7                     | 9.71                  | 10          | 13          | 10.2        | 9         | 11.4       | 13.8        |
| -3.77+1.98-2.5+2.6i  | -3.8                  | -3.75+1.31            | -6.36       | -7.25       |             | -5        | -6.5       | -8.62       |
| -3.77-1.98i-2.5-2.6i | -2.82+2.38-3.75-1.31i | -2.52+1.82            |             |             |             | -1        | -2.95      | -3.41       |
| -2.4                 | -1                    | -2.82-2.38i           | 0           | -2.52-1.82i | 0           | 0         | 0          | 0           |
| 2.94                 | 0                     | 2.45                  | 0.506       | 3.39        | 3.32        | 0         | 2.45       | 4.02        |



|             |             |             |             |             |            |             |             |             |
|-------------|-------------|-------------|-------------|-------------|------------|-------------|-------------|-------------|
| 6598        | 6602        | 6604        | 6606        | 6614        | 6616       | 6618        | 6620        | 6622        |
| -0.686+1.0  | -0.618      | -1          | -0.745+0.7  | -0.745+0.7  | -1         | -1          | -1          | -1          |
| -0.686-1.0  | -0.5+0.866i | -0.618      | -0.745-0.7  | -0.745-0.7  | 0          | -0.42+0.60i | -0.618      | -0.574+0.3  |
| -0.373      | -0.5-0.866i | 0           | -0.459      | -0.459      | 0          | -0.42-0.60i | 0           | -0.574-0.3  |
| 1.75        | 1.62        | 1.62        | 1.95        | 1.95        | 1          | 1.84        | 1.62        | 2.15        |
| 1.79        | 1.89        | 2           | 2.12        | 2.12        | 3          | 2.27        | 2.75        | 2.47        |
| 4           | 3.7+0.755i  | 2.38        | 4           | 4           | 3          | 4           | 3           | 4.39+0.29i  |
| 4.1+0.665i  | 3.7-0.755i  | 4.62        | 4.35        | 4.35        | 3          | 4           | 4.45        | 4.39-0.29i  |
| 4.1-0.665i  | 4.72        | 5           | 5.53        | 5.53        | 5          | 5.73        | 5.8         | 6.74        |
| 2.76+1.07i  | 2.82+0.90i  | 2           | 3.12+0.83i  | 3.12+0.83i  | 3          | 3           | 3           | 3.53        |
| 2.76-1.07i  | 2.82-0.90i  | 3           | 3.12-0.83i  | 3.12-0.83i  | 3          | 3.37+0.69i  | 3.43+0.36i  | 3.61+0.71i  |
| 3           | 3           | 3.38        | 3.42        | 3.42        | 3          | 3.37-0.69i  | 3.43-0.36i  | 3.61-0.71i  |
| 5.49        | 5.36        | 5.62        | 6.34        | 6.34        | 5          | 6.27        | 6.15        | 7.24        |
| 0.121       | 0.139       | 0           | 0.191       | 0.191       | 0          | 0.18        | 0           | 0.235       |
| 1           | 1           | 0.209       | 0.473       | 0.473       | 0.551      | 0.599       | 0.313       | 0.321       |
| 2.35        | 1.75        | 2           | 2.11        | 2.11        | 1          | 1.67        | 1.57        | 2.08        |
| 3.53        | 4.11        | 4.79        | 5.22        | 5.22        | 5.45       | 5.55        | 6.12        | 6.37        |
| 3.05        | 3.19        | 2.74        | 4.04        | 4.04        | 3.69       | 4.22        | 4.36        | 5.24        |
| 13.4        | 12.9        | 7.67        | 14.2        | 14.2        | 12.5       | 14          | 14.7        | 20.3        |
| 14.4        | 15.2        | 20.5        | 20.6        | 20.6        | 15.8       | 21.2        | 20.6        | 21.2        |
| 26.2        | 25.6        | 28          | 35.2        | 35.2        | 25         | 34.6        | 34.3        | 46.3        |
| 7.38        | 6.88        | 3.3         | 8.03        | 8.03        | 6.45       | 7.69        | 7.83        | 12.3        |
| 9           | 9.38        | 9.31        | 12.3        | 12.3        | 9          | 11.9        | 11.7        | 12.9        |
| 10.3        | 10          | 12.5        | 12.6        | 12.6        | 9.93       | 13          | 12.5        | 14.1        |
| 30.3        | 30.7        | 33.9        | 41.1        | 41.1        | 31.6       | 41.4        | 42          | 53.7        |
| 8.77        | 9.86+5.52i  | 5.01        | 11.9+5.02i  | 11.9+5.02i  | 9.06+6.39i | 11.8+5.21i  | 11.1+5.44i  | 13.5+6.38i  |
| 10+6.57i    | 9.86-5.52i  | 13+3.16i    | 11.9-5.02i  | 11.9-5.02i  | 9.06-6.39i | 11.8-5.21i  | 11.1-5.44i  | 13.5-6.38i  |
| 10-6.57i    | 11.6+2.18i  | 13-3.16i    | 13.1        | 13.1        | 9.88       | 12.8        | 13.9        | 15.4        |
| 14.2        | 11.6-2.18i  | 14          | 21.1        | 21.1        | 15         | 21.5        | 21.8        | 32.6        |
| -1.14       | -1.68       | -1.92+0.96i | -1.69+2.91i | -1.69+2.91i | -3         | -3          | -2.64+0.34i | -3.57       |
| -0.762+3.5  | -0.514+2.8  | -1.92-0.96i | -1.69-2.91i | -1.69-2.91i | 0          | -0.99+2.17i | -2.64-0.34i | -1.87+1.57i |
| -0.762-3.5  | -0.514-2.8  | 0           | -1.55       | -1.55       | 0.101      | -0.99-2.17i | 0           | -1.87-1.57i |
| 9.67        | 9.71        | 10.8        | 12.9        | 12.9        | 9.9        | 13          | 13.3        | 16.3        |
| -4.43+3.16  | -3.8        | -6.73       | -4.92+0.99i | -4.92+0.99i | -5         | -6.36       | -6.56       | -8.05       |
| -4.43-3.16i | -2.82+2.38  | -2.76       | -4.92-0.99i | -4.92-0.99i | -1+2i      | -2.52+1.82i | -2.44       | -2.73+1.22i |
| -1.32       | -2.82-2.38i | 0           | -2.07       | -2.07       | -1-2i      | -2.52-1.82i | 0           | -2.73-1.22i |
| 3.17        | 2.45        | 2.48        | 3.91        | 3.91        | 0          | 3.39        | 1           | 4.5         |

|             |             |             |             |            |             |             |             |            |
|-------------|-------------|-------------|-------------|------------|-------------|-------------|-------------|------------|
| 6854        | 6858        | 6862        | 6870        | 6874       | 6876        | 6878        | 7126        | 7128       |
| -1          | -1          | -1          | -1          | -1.53      | -0.885+0.5  | -1          | -1          | -1         |
| -0.348+1.0  | -0.618      | -0.42+0.60  | -0.5+0.866  | -0.347     | -0.885-0.5i | -0.574+0.3  | -0.635+0.6  | -1         |
| -0.348-1.0i | 0           | -0.42-0.60i | -0.5-0.866i | 0          | 0           | -0.574-0.3i | -0.635-0.6i | 1+1.18e-08 |
| 1.7         | 1.62        | 1.84        | 2           | 1.88       | 1.77        | 2.15        | 2.27        | 1-1.18e-08 |
| 1.74        | 1.85        | 2.16        | 2           | 2.15       | 2.23        | 2.38        | 2.27        | 3          |
| 3.63+1.09i  | 3           | 4.42+0.60i  | 4.12+0.74i  | 3.23       | 4           | 4.62        | 4           | 3          |
| 3.63-1.09i  | 4.57+0.36i  | 4.42-0.60i  | 4.12-0.74i  | 4.77       | 4.88+0.59i  | 5           | 5.73        | 5          |
| 5           | 4.57-0.369  | 5           | 5.75        | 5.85       | 4.88-0.59i  | 6           | 6           | 5          |
| 2.82+0.90i  | 2.2         | 3           | 3.12+0.83i  | 2.32       | 3.12+0.59i  | 3.58+0.42i  | 3.42+0.55i  | 3          |
| 2.82-0.903  | 3           | 3.58+0.60i  | 3.12-0.834  | 3.46       | 3.12-0.59i  | 3.58-0.425i | 3.42-0.55i  | 3          |
| 3           | 3.55        | 3.58-0.606  | 3.42        | 4          | 4           | 4           | 4           | 5+2.11e-08 |
| 5.36        | 5.25        | 5.84        | 6.34        | 6.21       | 5.77        | 6.83        | 7.15        | 5-2.11e-08 |
| 1           | 0           | 0.172       | 0.438       | 0          | 0           | 0.13        | 0.402       | 0.172      |
| 1           | 1           | 1           | 1           | 0.486      | 1           | 0.593       | 1           | 1          |
| 1           | 1.27        | 1           | 2           | 2.43       | 1.7         | 2.09        | 1.68        | 1          |
| 4           | 4.73        | 5.83        | 4.56        | 5.09       | 5.3         | 6.19        | 5.92        | 5.83       |
| 2.98        | 3.18        | 4.28        | 3.86        | 4.04       | 4.31        | 5.21        | 4.78        | 4.68       |
| 13.5        | 8.33        | 16.5        | 14.5        | 11.2       | 16.6        | 19.4        | 15.3        | 17.3       |
| 15.5        | 22.1        | 25          | 21.1        | 23.9       | 25.5        | 28.2        | 36          | 25         |
| 25          | 23.4        | 26.3        | 34.6        | 34.9       | 25.6        | 38.2        | 36.9        | 25         |
| 7.27        | 4.48        | 9           | 8.16        | 5.25       | 9.42        | 10.5        | 8.53        | 9          |
| 9           | 7.51        | 9.77        | 11.6        | 11         | 9.46        | 13.1        | 16          | 9          |
| 9.84        | 15          | 16.6        | 13.1        | 17         | 16.5        | 18.9        | 16.8        | 16.8       |
| 30.9        | 30          | 36.7        | 41.1        | 40.7       | 36.6        | 48.4        | 51.7        | 37.2       |
| 7.83        | 8.88+0.70i  | 13.6+7.4i   | 10.3        | 9.56       | 13.2+5.07i  | 15.5+5.02i  | 11.5        | 13+7.48i   |
| 10.1+6.95i  | 8.88-0.704i | 13.6-7.4i   | 13+5.93i    | 14.3+0.47i | 13.2-5.07i  | 15.5-5.02i  | 18.5        | 13-7.48i   |
| 10.1-6.95i  | 12.6+4.71i  | 13.9        | 13-5.93i    | 14.3-0.479 | 14.8+5.61i  | 21+1.27i    | 21          | 15         |
| 15          | 12.6-4.71i  | 15          | 21.7        | 19.9       | 14.8-5.61i  | 21-1.27i    | 24          | 15         |
| -3          | -1.3+0.536  | -3          | -3.33       | -3.72      | -2.06+2.39  | -3.22       | -4          | -3         |
| 0.169+3.1i  | -1.3-0.536i | -0.624+2.4  | -0.735+3.1  | -0.973     | -2.06-2.39i | -1.74+2i    | -1.77+2.7i  | -3         |
| 0.169-3.11  | 0           | -0.624-2.4i | -0.735-3.1i | 0          | 0           | -1.74-2i    | -1.77-2.7i  | 2.1        |
| 9.66        | 9.6         | 12.2        | 12.8        | 12.7       | 12.1        | 15.7        | 16.5        | 11.9       |
| -5          | -5          | -5          | -6.28       | -8.66      | -5.13+2.22  | -7.31       | -6          | -5         |
| -2.38+3.53  | -4.46       | -3.2+1.57i  | -2.86+2.81  | -2.57      | -5.13-2.22i | -3.08+0.80  | -4.2+1.29i  | -5         |
| -2.38-3.53i | 0           | -3.2-1.57i  | -2.86-2.81i | 0          | 0           | -3.08-0.80i | -4.2-1.29i  | 1+2.83i    |
| 2.76        | 2.46        | 3.39        | 4           | 3.23       | 2.27        | 4.46        | 5.39        | 1-2.83i    |

|            |            |       |       |             |       |       |             |       |
|------------|------------|-------|-------|-------------|-------|-------|-------------|-------|
| 7130       | 7134       | 13140 | 13150 | 13150       | 13150 | 13260 | 13260       | 13280 |
| -1+1.24e-0 | -1         | -1    | -1    | -1          | -1.3  | -2    | -1.68       | -1.56 |
| -1-1.24e-0 | -1         | -1    | -1    | -1          | -1    | 0     | -0.539      | -1    |
| 0          | -0.414     | 0     | 0     | 0           | 0     | 0     | 0           | 0     |
| 2          | 2.41       | 2     | 2     | 2           | 2.3   | 2     | 2.21        | 2.56  |
| 2.59       | 2.66       | 2     | 2     | 2           | 2.21  | 2     | 2.27        | 2.44  |
| 4          | 4.53       | 2.59  | 3     | 3.38        | 3.38  | 4     | 4           | 4     |
| 5.41       | 6          | 5.41  | 5     | 5           | 5.62  | 4     | 5.73        | 6.56  |
| 6          | 6.81       | 6     | 6     | 5.62        | 6.79  | 6     | 6           | 7     |
| 3.27       | 4          | 2     | 2.44  | 2.7         | 2.67  | 2     | 2.66        | 3     |
| 4+3.72e-08 | 4          | 3.27  | 3     | 3           | 3.48  | 4     | 4           | 4     |
| 4-3.72e-08 | 4.27       | 4     | 4     | 4           | 4.42  | 4     | 4.53        | 5     |
| 6.73       | 7.73       | 6.73  | 6.56  | 6.3         | 7.43  | 6     | 6.81        | 8     |
| 0          | 0.0815     | 0     | 0     | 0           | 0     | 0     | 0           | 0     |
| 0.773      | 1          | 1     | 0.764 | 0.657       | 1.21  | 0     | 0.222       | 1     |
| 1.82       | 1.7        | 1.44  | 2     | 2.53        | 2     | 4     | 3.29        | 2.44  |
| 6.41       | 7.22       | 5.56  | 5.24  | 4.81        | 5.79  | 4     | 5.49        | 6.56  |
| 5.4        | 6.33       | 3.05  | 3.82  | 3.87        | 4.65  | 4     | 5.06        | 5.95  |
| 19.7       | 22.5       | 8.43  | 8.68  | 11.2        | 11.7  | 16    | 16          | 16    |
| 27.9       | 36         | 30.5  | 26.2  | 23.8        | 32.3  | 16    | 30.5        | 43.1  |
| 38         | 47.1       | 36    | 37.3  | 35.2        | 46.4  | 36    | 39.4        | 49    |
| 10.3       | 13.1       | 3.64  | 5.79  | 5.47        | 6.64  | 4     | 6.89        | 9     |
| 13         | 16         | 11.3  | 8     | 11.1        | 12.3  | 16    | 16          | 16    |
| 19.1       | 21.7       | 16    | 18    | 17          | 20.4  | 16    | 20.5        | 25    |
| 48.7       | 61.2       | 47.1  | 44.2  | 40.5        | 55.6  | 36    | 47.6        | 64    |
| 14.9+5.44i | 17.5+4.66i | 4.52  | 8     | 9.25        | 8.69  | 12    | 12.4        | 12.7  |
| 14.9-5.44i | 17.5-4.66i | 14    | 9.68  | 14.6+1.22i  | 14.5  | 12    | 16          | 16    |
| 21.6+1.92i | 24         | 19.5  | 20    | 14.6-1.22i  | 21.1  | 16    | 22.3+4.34i  | 30.3  |
| 21.6-1.92i | 33         | 24    | 22.3  | 19.6        | 32.7  | 16    | 22.3-4.34i  | 35    |
| -3.36+1.1i | -4         | -4    | -3    | -2.33+1.62  | -4    | -4    | -3.2+0.628  | -5    |
| -3.36-1.1i | -3.85      | -2.72 | -2.39 | -2.33-1.62i | -3.76 | 0     | -3.2-0.628i | -4.84 |
| 0          | -1.75      | 0     | 0     | 0           | 0     | 0     | 0           | 0     |
| 15.7       | 19.6       | 14.7  | 13.4  | 12.7        | 16.8  | 12    | 15.4        | 19.8  |
| -7.37      | -7.69      | -6    | -7    | -8.24       | -8.37 | -12   | -10.6       | -9.64 |
| -4.52      | -6         | -6    | -5    | -3.76       | -6    | 0     | -3.1        | -7    |
| 0          | -1.91      | 0     | 0     | 0           | 0     | 0     | 0           | 0     |
| 2.88       | 5.59       | 4     | 4     | 4           | 5.37  | 4     | 4.73        | 6.64  |

|                     |             |             |            |             |             |            |           |            |
|---------------------|-------------|-------------|------------|-------------|-------------|------------|-----------|------------|
| 14680               | 14690       | 14790       | 14800      | 14810       | 14810       | 14810      | 15260     | 15260      |
| -1                  | -1.3        | -1+1i       | -0.953+0.6 | -1          | -1          | -1         | -1        | -1         |
| -0.5+0.866i         | -0.5+0.866i | -1-1i       | -0.953-0.6 | -0.635+0.6  | -0.574+0.3  | -0.756+0.4 | -1        | -1         |
| -0.5-0.866i         | -0.5-0.866i | 0           | -0.328     | -0.635-0.6  | -0.574-0.3  | -0.756-0.4 | 0         | -0.414     |
| 2                   | 2.3         | 2           | 2.23       | 2.27        | 2.15        | 2.51       | 2         | 2.41       |
| 2                   | 2.21        | 2           | 2.27       | 2.27        | 2.38        | 2.51       | 3         | 2.66       |
| 4.12+0.745i         | 4.5+0.866i  | 4           | 5          | 4           | 4.62        | 5          | 3         | 4.53       |
| 4.12-0.745i         | 4.5-0.866i  | 5+1i        | 5          | 5.73        | 5           | 5.66       | 6         | 6          |
| 5.75                | 6.79        | 5-1i        | 5.73       | 6           | 6           | 6.83       | 6         | 6.81       |
| 3.12+0.834i         | 3.5+0.866i  | 3+1i        | 3.38+0.78i | 3.42+0.55i  | 3.58+0.42i  | 3.8+0.629i | 3         | 4          |
| 3.12-0.834i         | 3.5-0.866i  | 3-1i        | 3.38-0.78i | 3.42-0.55i  | 3.58-0.42i  | 3.8-0.629i | 4         | 4          |
| 3.42                | 3.7         | 4           | 4.35       | 4           | 4           | 4.61       | 4         | 4.27       |
| 6.34                | 7.3         | 6           | 6.89       | 7.15        | 6.83        | 7.79       | 7         | 7.73       |
| 0.438               | 1           | 0           | 0.0688     | 0.402       | 0.13        | 0.266      | 0         | 0.0815     |
| 1                   | 1           | 2           | 1.2        | 1           | 0.593       | 1.4        | 1         | 1          |
| 2                   | 1.7         | 2           | 2.18       | 1.68        | 2.09        | 1.6        | 1         | 1.7        |
| 4.56                | 5.3         | 4           | 5.55       | 5.92        | 6.19        | 6.74       | 7         | 7.22       |
| 3.86                | 4.88        | 4           | 5.05       | 4.78        | 5.21        | 6.16       | 5.09      | 6.33       |
| 14.5                | 21          | 16          | 19.2       | 15.3        | 19.4        | 22.2       | 15.9      | 22.5       |
| 21.1                | 21          | 26          | 28.4       | 36          | 28.2        | 36.6       | 36        | 36         |
| 34.6                | 46.1        | 26          | 38.3       | 36.9        | 38.2        | 47.1       | 36        | 47.1       |
| 8.16                | 13          | 10          | 10.8       | 8.53        | 10.5        | 13.2       | 8.38      | 13.1       |
| 11.6                | 13          | 10          | 13.5       | 16          | 13.1        | 16.5       | 16        | 16         |
| 13.1                | 13.7        | 16          | 18.6       | 16.8        | 18.9        | 21.4       | 16        | 21.7       |
| 41.1                | 53.3        | 36          | 48.1       | 51.7        | 48.4        | 60.9       | 52.6      | 61.2       |
| 10.3                | 12.4        | 12          | 16.8+5i    | 11.5        | 15.5+5.02i  | 19.3+3.48i | 13.5+2.6i | 17.5+4.66i |
| 13+5.93i            | 15+6.93i    | 14+8i       | 16.8-5i    | 18.5        | 15.5-5.02i  | 19.3-3.48i | 13.5-2.6i | 17.5-4.66i |
| 13-5.93i            | 15-6.93i    | 14-8i       | 17.2       | 21          | 21+1.27i    | 20.3       | 24        | 24         |
| 21.7                | 32.6        | 16          | 22.2       | 24          | 21-1.27i    | 33.1       | 24        | 33         |
| -3.33               | -5.05       | -2+4i       | -2.53+3.02 | -4          | -3.22       | -4.63      | -4        | -4         |
| -0.735+3.1-1+3.46i  | -2-4i       | -2.53-3.02i | -1.77+2.7i | -1.74+2i    | -2.42+2.45  | -4         | -4        | -3.85      |
| -0.735-3.1-1-3.46i  | 0           | -1.5        | -1.77-2.7i | -1.74-2i    | -2.42-2.45i | 0          | 0         | -1.75      |
| 12.8                | 16          | 12          | 15.6       | 16.5        | 15.7        | 19.5       | 17        | 19.6       |
| -6.28               | -8.37       | -6+4i       | -6.2+2.09i | -6          | -7.31       | -7.24      | -6        | -7.69      |
| -2.86+2.81-3+3.46i  | -6-4i       | -6.2-2.09i  | -4.2+1.29i | -3.08+0.80  | -5          | -6         | -6        | -6         |
| -2.86-2.81i-3-3.46i | 0           | -1.54       | -4.2-1.29i | -3.08-0.80i | -4.18       | 0          | 0         | -1.91      |
| 4                   | 5.37        | 4           | 4.94       | 5.39        | 4.46        | 6.42       | 3         | 5.59       |

|            |             |       |
|------------|-------------|-------|
| 15310      | 15330       | 31710 |
| -1         | -1          | -1    |
| -1         | -1          | -1    |
| -0.414     | -0.732      | -1    |
| 2.41       | 2.73        | 3     |
| 2.59       | 2.79        | 3     |
| 5.41       | 5.54        | 7     |
| 6          | 6.68        | 7     |
| 6          | 7           | 7     |
| 4          | 4.32+0.358i | 5     |
| 4          | 4.32-0.358i | 5     |
| 4.59       | 5           | 5     |
| 7.41       | 8.37        | 9     |
| 0.146      | 0.28        | 1     |
| 0.382      | 1           | 1     |
| 2.62       | 1.8         | 1     |
| 6.85       | 7.92        | 9     |
| 6.41       | 7.57        | 9     |
| 30.5       | 30.5        | 49    |
| 30.6       | 45.9        | 49    |
| 42.5       | 49          | 49    |
| 12.5       | 17.1        | 25    |
| 20.4       | 20.5        | 25    |
| 20.5       | 25          | 25    |
| 56.6       | 70.4        | 81    |
| 21.5+3.71i | 22.4+4.08i  | 27    |
| 21.5-3.71i | 22.4-4.08i  | 35    |
| 23.5+4.87i | 31.2        | 35    |
| 23.5-4.87i | 35          | 35    |
| -3.5+1.94i | -5          | -5    |
| -3.5-1.94i | -3.53+1.09i | -5    |
| -1.81      | -3.53-1.09i | -5    |
| 18.8       | 23.1        | 27    |
| -9         | -7.91       | -7    |
| -4         | -7          | -7    |
| -2.53      | -3.51       | -7    |
| 5.53       | 7.42        | 9     |

| pattern id      | 14                                                      | 28                                                      | 30                                                       | 74                                                       | 76                                                      | 78                                                     | 90                                                       | 92                                                       |
|-----------------|---------------------------------------------------------|---------------------------------------------------------|----------------------------------------------------------|----------------------------------------------------------|---------------------------------------------------------|--------------------------------------------------------|----------------------------------------------------------|----------------------------------------------------------|
| E               | [0;0;0;1]<br>[0;0;0;-1]<br>[0;0;0;-1]<br>[0;0;0;-1]     | [0;0;1;0]<br>[0;0;-1;0]<br>[0;0;1;0]<br>[0;0;1;0]       | [0;0;-0.707<br>[0.707;0;-C<br>[0;0.707;-C<br>[0;0;0.707; | [0;0;0;1]<br>[0;0;0;-1]<br>[0;0;0;-1]<br>[0;0;0;1]       | [0;0;0;1]<br>[0;0;0;-1]<br>[0;0;1;0]<br>[0;0;-0.707     | [0;0;0;1]<br>[0;0;0;-1]<br>[0;0;0;-1]<br>[0;0;0;1]     | [0;0;-0.707<br>[0.707;0;-C<br>[0;0.707;0;<br>[0;0;0.707; | [0;0;1;0]<br>[0;0;-1;0]<br>[0;0;1;0]<br>[0;0;1;0]        |
| LE              | [0.8944;0;<br>[0;0.8944;<br>[0;0;0.894<br>[0;0;0;1]     | [0;0;1;0]<br>[0;0;1;0]<br>[0;0;1;0]<br>[0;0;-0.447      | [0.8165;0;<br>[0;0.8165;<br>[0;0;-0.923<br>[0;0;0.382    | [0.7071;0;<br>[0;0.5774;<br>[0;0;0;1]<br>[0;0;0;1]       | [0.7071;0;<br>[0;0;1;0]<br>[0;0;1]<br>[0;0;1]           | [0.8944;0;<br>[0;0.707<br>[0;0.707<br>[0;0;0;1]        | [0.8018;0;<br>[0;0.8018;<br>[0;0.707<br>[0;0.707         | [0.8165;0;<br>[0;0;1;0]<br>[0;0;1;0]<br>[0;0;-0.707      |
| QE              | [0.8944;0;<br>[0;0.8944;<br>[0;0;0.894<br>[0;0;0;1]     | [0;0;1;0]<br>[0;0;1;0]<br>[0;0;1;0]<br>[0;0;0.447       | [0.8165;0;<br>[0;0.8165;<br>[0;0;-0.923<br>[0;0;-0.382   | [0.7071;0;<br>[0;0.5774;<br>[0;0;0;1]<br>[0;0;0;-1]      | [0.7071;0;<br>[0;0;1;0]<br>[0;0;1]<br>[0;0;-1]          | [0.8944;0;<br>[0;0.707<br>[0;0.707<br>[0;0;0;1]        | [0.8018;0;<br>[0;0.8018;<br>[0;0.707<br>[0;0.707         | [0.8165;0;<br>[0;0;1;0]<br>[0;0.7071;<br>[0;0.707        |
| AA <sub>t</sub> | [1;0;0;0]<br>[0;1;0;0]<br>[0;0;1;0]<br>[0;0;0;1]        | [1;0;0;0]<br>[0;1;0;0]<br>[0;0;1;0]<br>[0;0;0;1]        | [1;0;0;0]<br>[0;1;0;0]<br>[0;0;1;0]<br>[0;0;0;1]         | [1;0;0;0]<br>[0;1;0;0]<br>[0;0;1;0]<br>[0;0;0;1]         | [1;0;0;0]<br>[0;1;0;0]<br>[0;0;-0.851<br>[0;0;0.526;    | [1;0;0;0]<br>[0;1;0;0]<br>[0;0;1;0]<br>[0;0;0.383;     | [1;0;0;0]<br>[0;1;0;0]<br>[0;0;1;0]<br>[0;0;0;1]         | [1;0;0;0]<br>[0;1;0;0]<br>[0;0;-0.707<br>[0;0;0.707;     |
| LL <sub>t</sub> | [0.571;0.5<br>[-0.211;0.7<br>[0.789;-0.2<br>[0.0877;-C  | [-0.566;-0.<br>[0.707;-0.7<br>[0.415;0.4<br>[-0.0859;-C | [-0.685;-0.<br>[0.707;-0.7<br>[-0.169;-0.<br>[-0.0461;-C | [-0.579;-0.<br>[0.78;-0.6C<br>[-0.207;-0.<br>[-0.116;0.C | [0.664;0.4<br>[-0.701;0.3<br>[0.235;-0.6<br>[-0.111;-0. | [0.978;0.1<br>[-0.192;0.7<br>[-0.0117;0<br>[-0.0838;-C | [-0.688;-0.<br>[0.706;-0.7<br>[-0.162;-0.<br>[-0.0439;0  | [-0.962;-0.<br>[-0.258;0.7<br>[-0.0183;-C<br>[-0.0861;-C |
| QQ <sub>t</sub> | [0.571;0.5<br>[-0.211;0.7<br>[0.789;-0.2<br>[0.0877;0.C | [0.566;0.5<br>[0.707;-0.7<br>[0.415;0.4<br>[0.0859;0.C  | [-0.685;-0.<br>[0.707;-0.7<br>[-0.169;-0.<br>[0.0461;0.C | [0.579;-0.7<br>[0.78;0.60<br>[-0.207;0.2<br>[0.116;0.0   | [-0.664;-0.<br>[0.701;-0.3<br>[0.235;0.6<br>[0.111;0.5  | [0.991;0.0<br>[0.0264;0.<br>[-0.112;0.5<br>[0.0696;0.0 | [0.688;-0.6<br>[0.706;0.7<br>[-0.162;0.1<br>[0.0439;0.C  | [-0.985;-0.<br>[0.0517;0.<br>[0.155;-0.5<br>[0.064;0.2   |
| LQ <sub>t</sub> | [0;0;0;-1]<br>[0;0;0;-1]<br>[0;0;0;-1]<br>[0;0;0;1]     | [0;0;1;0]<br>[0;0;1;0]<br>[0;0;-1;0]<br>[0;0;1;0]       | [0;0.707;-C<br>[0.707;0;-C<br>[0;0;-0.707<br>[0;0;0.707; | [0;0;0;-1]<br>[0;0;0;1]<br>[0;0;0;1]<br>[0;0;-1]         | [0;0;1;0]<br>[0;0;-0.707<br>[0;0;1]<br>[0;0;-1]         | [0;0;0;1]<br>[0;0;0;-1]<br>[0;0;0;1]<br>[0;0;0;-1]     | [0;0;0.707;<br>[0.707;0;<br>[0;0;-0.707<br>[0.707;0;-C   | [0;0;1;0]<br>[0;0;-1;0]<br>[0;0;1;0]<br>[0;0;1;0]        |
| AQ <sub>t</sub> | [0.948683;<br>[0;0.94868<br>[0;0;0.948<br>[0;0;0;1]     | [0.534522;<br>[0;0.53452<br>[0;0.77151<br>[0;0;0.948    | [0;0;-0.894<br>[0.894427;<br>[0;0.77151<br>[0;0;-0.707   | [0.894427;<br>[0.577350;<br>[0;0.44721<br>[0;0;-0.85C    | [0;0;-0.707<br>[0.577350;<br>[1.256073<br>[0;3.14018    | [0;0;-0.707<br>[0.811107;<br>[0.811107;<br>[0;0.81110  | [0;0;-0.894<br>[0.811107;<br>[3.972054<br>[0;3.97205     | [0;0;-0.894<br>[0.811107;<br>[0.904534<br>[0;0.894       |
| AL <sub>t</sub> | [0;0;0;1]<br>[0.948683;<br>[0;0.94868<br>[0;0;0.948     | [0;0;-0.948<br>[0;0;1;0]<br>[0.534522;<br>[0;0.53452    | [0;0;-0.707<br>[0.771516<br>[0;0.77151<br>[0.894427;     | [0;0;0;1]<br>[0;0.447<br>[0;0.850<br>[0.577350;          | [0;0;0.525<br>[0;0.707<br>[0;0.850<br>[0.942809         | [0;0;-0.707<br>[0.811107;<br>[0.811107;<br>[0;0.81110  | [0;0;0.816<br>[0;0;0.816<br>[0.904534<br>[0;0.81110      | [0;0;0.816<br>[0.811107;<br>[0.904534<br>[0.942809       |

| 94                                                                                                                                                                                                                                                                                                                                                                                                                                                                                                                                                                                                                                                                                                                                                            | 204       | 206                  | 222                             | 280                           | 282        | 286                                               | 328                                         | 330                                                    |                                           |                                          |                                                                   |                                           |                                                                                                                                                                              |                                                                                                                                                                                                                                                                               |                                                                                                                                                                                                                                                                               |           |                       |                                  |                                   |           |                         |                                           |                                                                                            |                                                                               |                                |           |                       |                                  |                                    |           |                          |                                            |                                                                                        |                                                                 |           |           |           |           |           |           |           |           |           |           |           |           |           |                                            |           |                                                      |                             |           |                                                           |           |           |           |           |
|---------------------------------------------------------------------------------------------------------------------------------------------------------------------------------------------------------------------------------------------------------------------------------------------------------------------------------------------------------------------------------------------------------------------------------------------------------------------------------------------------------------------------------------------------------------------------------------------------------------------------------------------------------------------------------------------------------------------------------------------------------------|-----------|----------------------|---------------------------------|-------------------------------|------------|---------------------------------------------------|---------------------------------------------|--------------------------------------------------------|-------------------------------------------|------------------------------------------|-------------------------------------------------------------------|-------------------------------------------|------------------------------------------------------------------------------------------------------------------------------------------------------------------------------|-------------------------------------------------------------------------------------------------------------------------------------------------------------------------------------------------------------------------------------------------------------------------------|-------------------------------------------------------------------------------------------------------------------------------------------------------------------------------------------------------------------------------------------------------------------------------|-----------|-----------------------|----------------------------------|-----------------------------------|-----------|-------------------------|-------------------------------------------|--------------------------------------------------------------------------------------------|-------------------------------------------------------------------------------|--------------------------------|-----------|-----------------------|----------------------------------|------------------------------------|-----------|--------------------------|--------------------------------------------|----------------------------------------------------------------------------------------|-----------------------------------------------------------------|-----------|-----------|-----------|-----------|-----------|-----------|-----------|-----------|-----------|-----------|-----------|-----------|-----------|--------------------------------------------|-----------|------------------------------------------------------|-----------------------------|-----------|-----------------------------------------------------------|-----------|-----------|-----------|-----------|
| [0;0;-0.707;0;0;1;0]                                                                                                                                                                                                                                                                                                                                                                                                                                                                                                                                                                                                                                                                                                                                          | [0;0;0;1] | [0;0;-0.707;0;0;1;0] | [0;0.577;0;0;-0.5;-0.5;0;0;1;0] | [0;0.577;-0.707;0;-C;0;0;0;1] | [0;0;0;-1] | [0.577;0;-C;0;1;0;0]                              | [0;1;0;0]                                   | [0;-0.707;C;0;0;-1;0]                                  | [0;0.577;-C;0;0.577;-C;0;0;-0.707;0;0;1]  | [0;0.577;-C;0;0.577;-C;0;0;-0.707;0;0;1] | [0;0.577;-C;0;0.577;-C;0;0;-0.707;-0.707;0;-C;0.816;-0.4;0;0;1;0] | [0.707;0;-C;0;0;0.707;0;0;-0.707;0;0;0;1] | [0;0;0.707;0;0.707;0;0.577;0;0;0.5;0.5;0;0;-1;0]                                                                                                                             | [0;-0.577;-0.9129;0;-C;0;0;1;0]                                                                                                                                                                                                                                               | [0.4082;0;-C;0.5774;0;-C;0;0;1;0]                                                                                                                                                                                                                                             | [0;1;0;0] | [0.7559;0;-C;0;0;1;0] | [0.5;0.5;0;-0.2673;0;-C;0;0;0;1] | [0;0.4082;-C;0.5774;0;-C;0;1;0;0] | [0;1;0;0] | [0;0.6572;0;-C;0;0;1;0] | [0;0.5484;-C;0;0;-0.85;0;0;0.707;0;0;0;1] | [0;0;0.707;0;0.707;0;0.707;0;-0.5469;0;-0.707;0.707;0;0.4344;-0;0;0.525;0;0;0.707;0;0;0;1] | [0;0;0.707;0;-0.4082;0;-0.2612;0;0.261;0;0.707;0;0.4344;-0.9129;0;-C;0;0;1;0] | [0.707;0;-0.9045;0;-C;0;0;1;0] | [0;1;0;0] | [0.7559;0;-C;0;0;1;0] | [0.866;0.2;0;0.707;0;-C;0;0;0;1] | [0;0.707;0;-C;0.9045;0;-C;0;1;0;0] | [0;1;0;0] | [0;0.6572;0;-C;0;0;-1;0] | [0;0.1588;-C;0;0;-0.85;0;0;-0.707;0;0;0;1] | [0;0;-0.707;0;0.707;0;-0.5469;0;-0.707;0.707;0;0.1588;-0;0;-0.525;0;0;-0.707;0;0;0;-1] | [0;0;0.707;0;0.4082;0;0.2612;0;-0.261;-0.707;0;-0.5261;1;0;0;0] | [1;0;0;0] | [1;0;0;0] | [1;0;0;0] | [1;0;0;0] | [1;0;0;0] | [1;0;0;0] | [1;0;0;0] | [1;0;0;0] | [1;0;0;0] | [0;1;0;0] | [0;1;0;0] | [0;1;0;0] | [0;1;0;0] | [0;-0.707;C;0;-0.707;C;0;-0.707;C;0;1;0;0] | [0;1;0;0] | [0;0;-0.85;0;0;-0.707;0;0;-0.788;0;0;-0.707;0;0;0;1] | [0;0.707;0;0.707;0;0;0;1;0] | [0;0;1;0] | [0;0;0.526;0;0;0.707;0;0;0.615;0;0;0.707;0;0.707;0;0;0;1] | [0;0;0;1] | [0;0;0;1] | [0;0;0;1] | [0;0;0;1] |
| [0.987;0.1;0.602;0.6;0.638;0.6;-0.661;-0.735;-0.734;-0.965;0.1;0.7;0.375;0.923;0.2;0.148;-0.8;0;0;-0.707;-0.707;0.7;0.707;-0.7;0;0.707;-C;0.661;-0.7;-0.261;0.6;0.667;-0.3;-0.376;0.6;-0.0476;-C;0.707;-0.7;0.236;0.2;-0.251;-0.673;0.4;-0.153;-0.0;0.707;-C;-0.236;0.4;-0.0159;0;-0.0416;-C;-0.372;-0.193;-0.0;0;-0.707;-0.0815;-C;-0.045;-0.0303;-C;-0.0971;-C;-0.0807;-C;0.994;0.0;0.602;0.6;-0.678;-0.699;-0.735;0.4;0.734;0.5;0.965;0.1;0.7;0.375;0.988;0.0;0.0065;0;-0.707;0.707;-0.7;0.707;-0.7;0;0.707;-C;0.661;-0.7;-0.261;0.6;0.667;-0.3;0.0656;-0.101;0.2;0.707;-0.7;0.0345;0.0;0;0.707;0.673;-0.4;0.153;0.2;0;0.707;-C;0.236;-0.4;0.116;-0.4;0.036;0.1;0.372;0.3;0.198;0.1;0.109;0.1;0.0815;0.045;0.2;0.0303;0.0971;0.071;0.3;0;0;-0.707;0;0;1;0] | [0;0;0;1] | [0.577;0;-C;0;0;1;0] | [0;0.577;0;0;-0.5;-0.5;0;0;1;0] | [0;0.577;-C;0;0;0;1]          | [0;0;0;1]  | [0;0;0.707;0;0.707;0;0.577;0;0;-0.707;C;0;0;-1;0] | [0.707;0;-C;0;0.577;-C;0;0;-0.707;0;0;0;-1] | [0;0;-0.707;0;0;-0.707;-0.707;0;-C;0.816;-0.4;0;0;1;0] | [0;0.577;-C;0;0;0.707;0;0;-0.707;0;0;0;1] | [0;0.577;-C;0;1;0;0]                     | [0;1;0;0]                                                         | [0;0.5;0.5;0;0;-1;0]                      | [0;-0.577;-0;0;-0.78;0;0;-0.707;0;0;-0.595;0;0;-0.707;0;0.707;0;0.63245;0;-0.6154;0.213200;0.899954;0.933333;0.632455;0.534522;0.953998;0.392232;0;-0.9045;0;-0.707;0;0;1;0] | [0;0.64681;0;0.92717;0;0.63245;0;0.53452;0;0.95399;0;-0.6882;0.824163;9.104950;0;1.11022;0;0.64681;0;0;-0.707;0;0;0.707;0;0;-0.475;0;0;0.707;0;0.707;0;0;-0.6324;0;0.57735;0;-1.1102;0;0.65174;0;0;-0.707;0;0;0.707;0;0;0.816;0;0;-0.707;0;0.707;0;-0.6324;0;0.57735;0;0;1;0] | [0;0.65465;0;0;0.832;0;0;0.707;0;0;0.816;0;0;0.707;0;0.68824;0;-0.9045;0;-0.707;0;1.11022;0;0.65465;5.558562;0.632455;0.784464;0.333333;0;-0.707;0.824163;9.104950;0;-1.1102;0.827605;0;1.38964;0;0.63245;0;0.78446;0;0.33333;0.392232;0;-0.6324;0;0.61545;0.213200;0;0.63960 |           |                       |                                  |                                   |           |                         |                                           |                                                                                            |                                                                               |                                |           |                       |                                  |                                    |           |                          |                                            |                                                                                        |                                                                 |           |           |           |           |           |           |           |           |           |           |           |           |           |                                            |           |                                                      |                             |           |                                                           |           |           |           |           |

| 332         | 334         | 344         | 346         | 348         | 350         | 390          | 392         | 394         |
|-------------|-------------|-------------|-------------|-------------|-------------|--------------|-------------|-------------|
| [0;-0.577;C | [0;-0.434+I | [0;0;1;0]   | [0;-0.656;- | [0;-0.707;C | [0;-0.707;C | [0;0.707;0;  | [0;1;0;0]   | [0;1;0;0]   |
| [0;0;1;0]   | [0;-0.434-C | [0;0;-1;0]  | [0;-0.656;- | [0;0;1;0]   | [0;-0.753;C | [0;-0.707;C  | [0;-1;0;0]  | [0;-1;0;0]  |
| [0;0;1;0]   | [0.707;0;-C | [0;0;1;0]   | [0.707;0;-C | [0;0;1;0]   | [0.707;0;-C | [0;0.707;-C  | [0;0;1;0]   | [0;1;0;0]   |
| [0;0.577;0. | [0;-0.548;- | [0;0;-1;0]  | [0;-0.414;- | [0;0.408;0. | [0;0.4;0.64 | [0;0.707;0;  | [0;1;0;0]   | [0;-1;0;0]  |
| [0;0;1;0]   | [0.8528;0.: | [0.6325;0.: | [0.7559;0.: | [0.8006;0.: | [0.8981;0.: | [0.5;0.5;0.: | [0;1;0;0]   | [0;1;0;0]   |
| [0;0;1;0]   | [0;0.3366;I | [0;0;1;0]   | [0;-0.6786  | [0;0;1;0]   | [0;0.4082;I | [0;0.8507;I  | [0;0;1;0]   | [0;-0.5774  |
| [0;0.5774;- | [0;-0.7071  | [0;0;1;0]   | [0;-0.5774  | [0;-0.2275  | [0;-0.5154  | [0;-0.7071   | [0;-0.7071  | [0;-0.5774  |
| [0;0.6882;- | [0;0.5615;- | [0;-0.7071  | [0;-0.3574  | [0;0.5217;I | [0;0.3484;I | [0;-0.5257   | [0;-0.7071  | [0;-0.4472  |
| [0;0;1;0]   | [0.9258;0.: | [0.8165;0.: | [0.9045;0.: | [0.898;0.1  | [0.9431;0.: | [0.5;-0.5;-C | [0;1;0;0]   | [0;1;0;0]   |
| [0;0;-1;0]  | [0;0.08672  | [0;0;1;0]   | [0;0.2862-I | [0;0;1;0]   | [0;-0.0863  | [0;0.8507;I  | [0;0;1;0]   | [0;-0.5774  |
| [0;-0.5774  | [0;0.08672  | [0;0;-1;0]  | [0;0.2862+  | [0;-0.6479  | [0;-0.0863  | [0;-0.7071   | [0;0.7071;I | [0;0.5774;- |
| [0;0.6882;I | [0;0.4845;I | [0;0.4082;I | [0;0.2752;I | [0;-0.4653  | [0;0.3036;I | [0;0.5257;I  | [0;-0.7071  | [0;0.4472;I |
| [1;0;0;0]   | [1;0;0;0]   | [1;0;0;0]   | [1;0;0;0]   | [1;0;0;0]   | [1;0;0;0]   | [1;0;0;0]    | [1;0;0;0]   | [1;0;0;0]   |
| [0;0;-0.851 | [0;0;-0.924 | [0;-0.851;C | [0;-0.851;C | [0;0.737;-C | [0;0.789;-C | [0;1;0;0]    | [0;0;-0.707 | [0;0;-0.851 |
| [0;1;0;0]   | [0;1;0;0]   | [0;0;0;1]   | [0;0;0;1]   | [0;-0.591;- | [0;-0.577;- | [0;0;1;0]    | [0;1;0;0]   | [0;1;0;0]   |
| [0;0;0.526; | [0;0;0.383; | [0;0.526;0. | [0;0.526;0. | [0;0.328;0. | [0;0.211;0. | [0;0;0;1]    | [0;0;0.707; | [0;0;0.526; |
| [-0.706;-0. | [0.981;0.1  | [0.943;0.1  | [0.97;0.16  | [0.975;0.1  | [-0.99;-0.0 | [-0.942;-0.  | [-0.517;-0. | [0.367;0.8  |
| [0.688;-0.2 | [-0.184;0.5 | [0.322;-0.6 | [0.237;-0.7 | [-0.217;0.5 | [-0.139;0.6 | [-0.256;0.7  | [-0.252;0.5 | [0.689;-0.4 |
| [0.161;-0.6 | [-0.0501;0. | [-0.015;-0. | [-0.0426;-C | [-0.0347;0  | [-0.0012;-C | [-0.217;-0.  | [0.595;-0.5 | [0.589;-0.0 |
| [-0.0441;-C | [-0.04;-0.4 | [-0.077;-0. | [-0.0391;-C | [-0.0409;-C | [-0.0289;-C | [0.0144;-0.  | [-0.562;-0. | [-0.207;-0. |
| [-0.706;-0. | [-0.995;-0. | [-0.985;-0. | [-0.993;-0. | [0.993;0.0  | [-0.997;-0. | [0.942;-0.1  | [0.517;0.5  | [0.0882;0.: |
| [0.688;-0.2 | [0.0116;-0. | [0.0455;-0. | [0.0519;-0. | [0.0341;0.: | [-0.00202;I | [0.256;0.7   | [0.252;-0.5 | [0.781;0.0  |
| [-0.161;0.6 | [-0.0903;0. | [-0.152;0.4 | [-0.0952;0  | [-0.108;0.7 | [-0.0772;0  | [-0.217;0.3  | [-0.595;0.5 | [-0.563;0.3 |
| [0.0441;0.: | [0.0374;0.: | [0.0608;0.: | [0.0361;0.: | [0.0347;0.: | [0.0253;0.: | [0.0144;0.:  | [0.562;0.2  | [0.256;0.2  |
| [0;0;1;0]   | [0;-0.434+I | [0;0;1;0]   | [0;-0.656;- | [0;0.408;0. | [0;-0.707;C | [0;0.707;0;  | [0;0;1;0]   | [0;1;0;0]   |
| [0;0.577;0. | [0;-0.434-C | [0;0;-1;0]  | [0;-0.656;- | [0;-0.707;C | [0;-0.753;C | [0;0.707;-C  | [0;1;0;0]   | [0;1;0;0]   |
| [0;-0.577;C | [0.707;0;-C | [0;0;1;0]   | [0.707;0;-C | [0;0;1;0]   | [0.707;0;-C | [0;0.707;0;  | [0;1;0;0]   | [0;-1;0;0]  |
| [0;0;1;0]   | [0;-0.548;- | [0;0;-1;0]  | [0;-0.414;- | [0;0;1;0]   | [0;0.4;0.64 | [0;-0.707;C  | [0;-1;0;0]  | [0;-1;0;0]  |
| [0;-0.5602  | [0;-0.3980  | [0;0.60889  | [0;-0.6568  | [0;0.80655  | [0;-0.8220  | [0;0.83205   | [0;0.81649  | [0;0.87716  |
| [0;-0.4302  | [0;-0.3980  | [0.145864   | [0;-0.6568  | [0.170251   | [0;-0.8220  | [0.471404    | [0.377964   | [0.077849   |
| [0.115470   | [0.898177   | [0;3.51083  | [0.925546   | [0;-0.1977  | [0.932673   | [0;-0.7071   | [0;1;0;0]   | [0;1;0;0]   |
| [0;0.50204  | [0;-0.5237  | [0;0.39832  | [0;0.47759  | [0;-0.4288  | [0;0.42118  | [0;0.70710   | [0;0.81649  | [0;0.76689  |
| [0;0.50204  | [0;-0.5773  | [0;0.35355  | [0;-0.6813  | [0;0.72098  | [0;0.65532  | [0;0.70710   | [0;-0.8164  | [0;-0.9045  |
| [0.115470   | [0;-0.2932  | [0;0.35355  | [0;-0.9701  | [0;0.41904  | [0;-0.4706  | [0;-0.7071   | [0;1;0;0]   | [0;-0.9045  |
| [0;0.43024  | [0.862261   | [0;2.10650  | [0.885722   | [0;0.41904  | [0.907392   | [0.471404    | [0;0.81649  | [0;1;0;0]   |
| [0;0.56025  | [0;0.68599  | [0.377964   | [0;0.50453  | [0.299812   | [0;0.52673  | [0;-0.8320   | [0.377964   | [0.228085   |



| 396         | 398         | 404         | 406          | 408         | 410         | 412         | 414          | 454         |
|-------------|-------------|-------------|--------------|-------------|-------------|-------------|--------------|-------------|
| [0;0.707;0] | [0;0.707;0] | [0;-0.577;- | [0;-0.5;-0.5 | [0;0;1;0]   | [0;0.577;0. | [0;-0.577;- | [0;-0.5;-0.5 | [0;-0.434+] |
| [0;0;1;0]   | [0;-0.707;C | [0;0;1;0]   | [0;-0.707;C  | [0;1;0;0]   | [0;1;0;0]   | [0;0;1;0]   | [0;-0.707;C  | [0;-0.434-C |
| [0;0;-1;0]  | [0;0.707;-C | [0;0;-1;0]  | [0;0.707;-C  | [0;-0.707;- | [0;1;0;0]   | [0;0;-1;0]  | [0;0.707;-C  | [0.577;-0.5 |
| [0;0.707;0] | [0;0.707;0] | [0;0.577;0. | [0;0.5;0.5;  | [0;0.707;0. | [0;0.577;0. | [0;0.577;0. | [0;0.5;0.5;  | [0;-0.548;- |
| [0;0;1;0]   | [0;0.9239;  | [0.7071;0;  | [0.7746;0.:  | [0;1;0;0]   | [0;1;0;0]   | [0;-0.6786. | [0;0.9064;   | [0.8006;0.: |
| [0;0.8507;  | [0;-0.7071. | [0;-0.6479. | [0;0.844;0.  | [0;0;1;0]   | [0.2357;-0. | [0;0;1;0]   | [0.4082;-0.  | [0;-0.5484. |
| [0.5774;-0. | [0;-0.7071. | [0;0;1;0]   | [0;-0.4491.  | [0;0;1;0]   | [0;-0.3556. | [0;0;1;0]   | [0;-0.3419.  | [0;-0.4344. |
| [0;-0.5257. | [0;-0.3827. | [0;0.4653;  | [0;0.2931;   | [0;-0.3333. | [0;-0.2289. | [0;0.3574;  | [0;0.2482;   | [0;-0.4344. |
| [0;0;1;0]   | [0;0.9239;  | [0.7071;0;- | [0.7746;-0.  | [0;1;0;0]   | [0;1;0;0]   | [0;-0.6786. | [0;0.9064;   | [0.8819;-0. |
| [0;0.8507;  | [0;-0.7071. | [0;-0.6479. | [0;0.844;0.  | [0;0;1;0]   | [0.7071;0;- | [0;0;1;0]   | [0.7071;0;-  | [0;-0.4344. |
| [0.5774;-0. | [0;0.7071;- | [0;0;1;0]   | [0;-0.4491.  | [0.5774;-0. | [0;-0.3556. | [0;0;-1;0]  | [0;-0.3419.  | [0;-0.4344. |
| [0;0.5257;  | [0;0.3827;  | [0;-0.4653. | [0;-0.2931.  | [0;0.3333;  | [0;0.2289;  | [0;-0.3574. | [0;-0.2482.  | [0;-0.5484. |
| [1;0;0;0]   | [1;0;0;0]   | [1;0;0;0]   | [1;0;0;0]    | [1;0;0;0]   | [1;0;0;0]   | [1;0;0;0]   | [1;0;0;0]    | [1;0;0;0]   |
| [0;0;-0.851 | [0;0;-0.924 | [0;-0.851;C | [0;-0.851;C  | [0;0.577;-C | [0;0.737;-C | [0;0.737;-C | [0;0.789;-C  | [0;1;0;0]   |
| [0;1;0;0]   | [0;1;0;0]   | [0;0;0;1]   | [0;0;0;1]    | [0;-0.707;C | [0;-0.591;- | [0;-0.591;- | [0;-0.577;-  | [0;0;-0.707 |
| [0;0;0.526; | [0;0;0.383; | [0;0.526;0. | [0;0.526;0.  | [0;0.408;0. | [0;0.328;0. | [0;0.328;0. | [0;0.211;0.  | [0;0;0.707; |
| [-0.549;-0. | [0.659;0.5  | [0.958;0.0  | [0.977;0.1   | [-0.286;-0. | [-0.273;-0. | [-0.674;-0. | [-0.649;-0.  | [0.978;0.1. |
| [-0.227;-0. | [0.429;-0.7 | [0.191;-0.8 | [0.176;-0.8  | [0.73;-0.36 | [0.843;-0.3 | [0.429;-0.7 | [0.656;-0.7  | [-0.191;0.6 |
| [0.782;-0.3 | [0.61;-0.04 | [-0.212;-0. | [-0.122;-0.  | [-0.602;0.C | [-0.46;-0.1 | [-0.596;0.C | [-0.383;-0.  | [0.0782;0.: |
| [-0.187;-0. | [-0.102;-0. | [0.0267;-0. | [0.0205;-0.  | [-0.149;-0. | [-0.043;-0. | [-0.084;-0. | [-0.043;-0.  | [-0.00795;- |
| [-0.549;-0. | [-0.27;0.71 | [0.958;-0.C | [0.977;-0.1  | [0.216;0.9. | [0.113;0.9. | [0.259;0.8. | [0.181;0.8.  | [0.992;0.0. |
| [0.227;0.7. | [0.766;0.4. | [-0.191;-0. | [-0.176;-0.  | [0.722;-0.C | [0.951;-0.C | [0.769;-0.C | [0.942;-0.C  | [-0.0301;-C |
| [0.782;-0.3 | [-0.571;0.3 | [0.212;-0.3 | [0.122;-0.4  | [-0.605;0.3 | [-0.256;0.2 | [-0.57;0.41 | [-0.269;0.3  | [0.117;-0.4 |
| [0.187;0.4. | [0.122;0.3. | [0.0267;0.4 | [0.0205;0.:  | [0.257;0.2. | [0.133;0.1. | [0.131;0.3. | [0.0852;0.:  | [0.0276;0.: |
| [0;0.707;0] | [0;0.707;-C | [0;0.577;0. | [0;-0.707;C  | [0;0.707;0. | [0;1;0;0]   | [0;0;-1;0]  | [0;0.707;-C  | [0;-0.548;- |
| [0;0;1;0]   | [0;0.707;0] | [0;0;-1;0]  | [0;0.707;-C  | [0;0;1;0]   | [0;0.577;0. | [0;0.577;0. | [0;-0.5;-0.5 | [0;-0.434+] |
| [0;0;-1;0]  | [0;-0.707;C | [0;-0.577;- | [0;-0.5;-0.5 | [0;1;0;0]   | [0;0.577;0. | [0;-0.577;- | [0;-0.707;C  | [0;-0.434-C |
| [0;0.707;0] | [0;0.707;0] | [0;0;1;0]   | [0;0.5;0.5;  | [0;-0.707;- | [0;1;0;0]   | [0;0;1;0]   | [0;0.5;0.5;  | [0.577;-0.5 |
| [0;-0.7796. | [0;-0.8327. | [0;0.68552  | [0;-0.6441.  | [0;-0.8164. | [0;0.57735  | [0;0.61980  | [0;-0.5773.  | [0;0.66778  |
| [0.447213!  | [0.365148!  | [0.674199!  | [0.456171!   | [0;-0.8164. | [0.087038!  | [0.322078!  | [0.282216!   | [0;0.66778  |
| [0;-0.4472. | [0;-0.8320. | [0;2.18451  | [0;-0.8277.  | [0.195740!  | [0;-0.9663. | [0;-0.3226! | [0;-0.9022.  | [0.779666!  |
| [0;0.66761  | [0;0.65823  | [0;-0.5664. | [0;0.51949   | [0;0.53452  | [0;-0.4928! | [0;-0.5214. | [0;0.48236   | [0;-0.4336! |
| [0;0.66761  | [0;0.71092  | [0;-0.5664. | [0;0.51949   | [0;-0.4714! | [0;-0.6123! | [0;-0.6180! | [0;-0.5773.  | [0;-0.3442! |
| [0;0.44721  | [0;-0.4472. | [0;2.18451  | [0;-0.8277.  | [0;-0.4714! | [0;0.84023  | [0;0.43864  | [0;-0.6388.  | [0;-0.3442! |
| [0.447213!  | [0.192450!  | [0.674199!  | [0.456171!   | [0;-0.9428! | [0;0.84023  | [0.522232!  | [0.223038!   | [0.953944!  |
| [0;0.77961  | [0;0.88685  | [0;-0.6855! | [0;0.64414   | [0.207598!  | [0.172132!  | [0;0.84906  | [0;-0.8131.  | [0;0.66666  |

|             | 456         | 458         | 460         | 462         | 468         | 470         | 472         | 474          | 476 |
|-------------|-------------|-------------|-------------|-------------|-------------|-------------|-------------|--------------|-----|
| [0;0;1;0]   | [0;0.577;-C | [0;-0.577;C | [0;-0.434+  | [0;-0.707;C | [0;-0.707;C | [0;0;1;0]   | [0;-0.656;- | [0;-0.707;C  |     |
| [0;0;-1;0]  | [0;0.577;-C | [0;0;1;0]   | [0;-0.434-C | [0;0;1;0]   | [0;-0.753;C | [0;0;-1;0]  | [0;-0.656;- | [0;0;1;0]    |     |
| [0;0;1;0]   | [0.577;-0.5 | [0;0;-1;0]  | [0.707;-0.7 | [0;0;-1;0]  | [0.577;-0.5 | [0;0;1;0]   | [0.577;-0.5 | [0;0;-1;0]   |     |
| [0;0;-1;0]  | [0;-0.577;- | [0;0.577;0. | [0;-0.548;- | [0;0.408;0. | [0;0.4;0.64 | [0;0;-1;0]  | [0;-0.414;- | [0;0.408;0.  |     |
| [0;0;1;0]   | [0;-0.771;- | [0;0;1;0]   | [0;0.5774;  | [0.8944;0;  | [0.9097;0.  | [0;0.7071;  | [0;0.8547;  | [0.2887;0.:  |     |
| [0;0;1;0]   | [0.4082;-0. | [0;0;1;0]   | [0;0.5774;  | [0;0.4082;  | [0;-0.5774. | [0;0.7071;  | [0.3015;-0. | [0;-0.3484.  |     |
| [0;0;1;0]   | [0;0.3916-  | [0;0;1;0]   | [0;-0.5774. | [0;0;1;0]   | [0;-0.5774. | [0;0;1;0]   | [0;-0.5177. | [0;0;1;0]    |     |
| [0;0;1;0]   | [0;0.3916+  | [0;0.6667;- | [0;0.5774;- | [0;0.7071;  | [0;-0.4082. | [0;-0.7071. | [0;-0.2682. | [0;0.5154;   |     |
| [0;0;1;0]   | [0.7071;0;- | [0;0;1;0]   | [0.7071;0;- | [0.8944;0;- | [0.9313;-0. | [0;0.7071;- | [0.5774;0.! | [0.5;0.5;-0. |     |
| [0;0;-1;0]  | [0;0.6559;- | [0;0;1;0]   | [0;0.3094-  | [0;-0.7071. | [0;-0.8629. | [0;0.7071;- | [0;0.6823;- | [0;-0.7529.  |     |
| [0;0;1;0]   | [0;0.6559;- | [0;0;-1;0]  | [0;0.3094+  | [0;0;1;0]   | [0;-0.7071. | [0;0;1;0]   | [0;0.6823;- | [0;0;1;0]    |     |
| [0;0;-1;0]  | [0;0.414;0. | [0;0.6667;  | [0;0.4623;  | [0;0.4082;  | [0;0.2811;  | [0;0;-1;0]  | [0;0.2043;  | [0;-0.4004.  |     |
| [1;0;0;0]   | [1;0;0;0]   | [1;0;0;0]   | [1;0;0;0]   | [1;0;0;0]   | [1;0;0;0]   | [1;0;0;0]   | [1;0;0;0]   | [0;-0.577;C  |     |
| [0;0;0.526; | [0;1;0;0]   | [0;0;-0.707 | [0;0;-0.78E | [0;0.628;-C | [0;0.844;-C | [0;0.628;-C | [0;0.844;-C | [1;0;0;0]    |     |
| [0;1;0;0]   | [0;0;-0.707 | [0;1;0;0]   | [0;1;0;0]   | [0;-0.707;C | [0;-0.449;- | [0;-0.707;C | [0;-0.449;- | [0;-0.789;-  |     |
| [0;0;-0.851 | [0;0;0.707; | [0;0;0.707; | [0;0;0.615; | [0;0.325;0. | [0;0.293;0. | [0;0.325;0. | [0;0.293;0. | [0;0.211;0.  |     |
| [-0.637;-0. | [-0.639;-0. | [-0.714;-0. | [0.792;0.4  | [0.988;0.0  | [0.992;0.0  | [-0.689;-0. | [-0.676;-0. | [0.814;0.3   |     |
| [-0.475;0.3 | [0.705;-0.€ | [-0.339;0.5 | [0.585;-0.7 | [-0.134;0.€ | [0.117;-0.7 | [0.645;-0.7 | [0.689;-0.7 | [0.548;-0.7  |     |
| [0.465;-0.€ | [-0.302;-0. | [0.595;-0.3 | [0.147;0.3  | [0.0794;0.: | [-0.0432;-C | [-0.325;-0. | [-0.26;-0.3 | [0.173;0.3   |     |
| [-0.391;-0. | [-0.0545;-C | [-0.143;-0. | [-0.098;-0. | [0;-0.707;C | [0.0252;-0. | [0.0606;-0. | [0.00135;-  | [-0.0888;-C  |     |
| [0.637;0.4  | [0.756;0.5  | [0.714;0.4  | [0.921;0.2  | [0.993;0.0  | [0.996;0.0  | [0.685;0.6  | [-0.748;-0. | [0.907;0.3   |     |
| [-0.475;0.3 | [0.617;-0.7 | [-0.339;0.5 | [0.3;-0.837 | [0;-0.707;C | [-0.0289;-C | [0.7;-0.70€ | [0.654;-0.7 | [0.365;-0.8  |     |
| [0.465;-0.€ | [-0.0628;0. | [0.595;-0.3 | [-0.221;0.1 | [0.114;-0.4 | [0.0757;-0. | [0.0476;0.: | [0.00527;-  | [-0.181;0.1  |     |
| [0.391;0.4  | [0.208;0.2  | [0.143;0.6  | [0.111;0.4  | [0.0304;0.! | [0.0221;0.: | [0.198;0.3  | [0.111;0.2  | [0.111;0.4   |     |
| [0;0;1;0]   | [0;-0.577;- | [0;0;1;0]   | [0;-0.548;- | [0;0;1;0]   | [0;0.4;0.64 | [0;0;1;0]   | [0;-0.414;- | [0;0;1;0]    |     |
| [0;0;-1;0]  | [0.577;-0.5 | [0;0.577;0. | [0;-0.434+  | [0;0.408;0. | [0;-0.707;C | [0;0;-1;0]  | [0;-0.656;- | [0;0.408;0.  |     |
| [0;0;1;0]   | [0;0.577;-C | [0;-0.577;C | [0;-0.434-C | [0;-0.707;C | [0;-0.753;C | [0;0;1;0]   | [0;-0.656;- | [0;-0.707;C  |     |
| [0;0;-1;0]  | [0;0.577;-C | [0;0;-1;0]  | [0.707;-0.7 | [0;0;-1;0]  | [0.577;-0.5 | [0;0;-1;0]  | [0.577;-0.5 | [0;0;-1;0]   |     |
| [0.478913;  | [0;-0.7060. | [0;0.75293  | [0;0.73594  | [0;0.70710  | [0;-0.8093  | [0;0.22526  | [0;0.70297  | [0;-0.7659.  |     |
| [0;0.66787  | [0;-0.7060. | [0;-0.6359  | [0;0.73594  | [0.685994   | [0;-0.8093  | [0;0.22526  | [0;0.70297  | [0;-0.5126.  |     |
| [0;0.66787  | [0.786146   | [0.695313   | [0.790183   | [0;-0.2734  | [0.839782   | [0.345857   | [0.757831   | [0.285032    |     |
| [0;0.34155  | [0;-0.4963  | [0;-0.4004  | [0;-0.4396  | [0;-0.3620  | [0;0.37012  | [0;0.37049  | [0;0.39643  | [0;0.36722   |     |
| [0;-0.3415  | [0;-0.3165  | [0;-0.4004  | [0;-0.3885  | [0;-0.7071  | [0;-0.6377  | [0;-0.5584. | [0;0.68618  | [0;0.70710   |     |
| [0;0.66787  | [0;-0.3165  | [0;0.63599  | [0;-0.3693  | [0;0.23570  | [0;-0.6929  | [0;-0.7607  | [0;-0.9503  | [0;0.58834   |     |
| [0;0.66787  | [0.203185   | [0.695313   | [0.748331   | [0.632455   | [0.962250   | [0;-0.7607  | [0.281480   | [0;0.66666   |     |
| [0.478913   | [0;0.78737  | [0;-0.7529  | [0;0.77345  | [0;0.57735  | [0;0.54454  | [0.522232   | [0;-0.6861  | [0.842281    |     |

| 478         | 856          | 858          | 862           | 904         | 906          | 908          | 910          | 922          |
|-------------|--------------|--------------|---------------|-------------|--------------|--------------|--------------|--------------|
| [0;-0.707;C | [0;0.707;-C  | [0;0;0.707;  | [0;0.408;0.   | [0;1;0;0]   | [0;1;0;0]    | [0;0.707;0;  | [0;0.707;0;  | [0;0;0.707;  |
| [0;-0.753;C | [0;-0.577;-  | [0;0.465;0.  | [0;-0.793;C   | [0;-1;0;0]  | [0;-1;0;0]   | [0;0;0.707;  | [0;-0.577;C  | [0;1;0;0]    |
| [0.707;-0.7 | [0;0.577;0.  | [0.5;-0.5;-C | [0.756;-0.3   | [0;-1;0;0]  | [0;1;0;0]    | [0;0;-0.707  | [0;0.577;-C  | [0;1;0;0]    |
| [0;0.4;0.64 | [0;0.707;0.  | [0;0.648;0.  | [0;0.577;0.   | [0;1;0;0]   | [0;-1;0;0]   | [0;0.707;0;  | [0;0.707;0;  | [0;0.816;0.  |
| [0.3244;0.4 | [0.7559;0.3  | [0.8615;0.3  | [0.9258;0.3   | [0;1;0;0]   | [0;1;0;0]    | [0;0.7071;0. | [0.1925;0.3  | [0;1;0;0]    |
| [0;-0.628;- | [0;0.7071;0. | [0;0.8018;0. | [0;-0.628;-   | [0;1;0;0]   | [0;1;0;0]    | [0;0.7071;0. | [0;0.8507;0. | [0;1;0;0]    |
| [0;-0.4082  | [0;-0.5774   | [0;-0.7071   | [0;-0.7071    | [0;1;0;0]   | [0;-0.7071   | [0;0.7071;0. | [0;-0.8165   | [0;-0.8165   |
| [0;-0.3251  | [0;-0.7071   | [0;0;0.707   | [0;-0.3251    | [0;1;0;0]   | [0;-0.7071   | [0;-0.7071   | [0;-0.5257   | [0;0;-0.707  |
| [0.8528;0.3 | [0.8752;0.3  | [0.9313;0.3  | [0.957;0.0    | [0;1;0;0]   | [0;1;0;0]    | [0;0.7071;0. | [0.378;0.7   | [0;1;0;0]    |
| [0;0.7071;- | [0;0.7071;-  | [0;-0.5;0.7  | [0;-0.7071    | [0;-1;0;0]  | [0;1;0;0]    | [0;-0.7071   | [0;0.8507;0. | [0;1;0;0]    |
| [0;-0.7071  | [0;-0.5774   | [0;0;0.707   | [0;0.5;0.5;-  | [0;-1;0;0]  | [0;0.7071;0. | [0;0.7071;0. | [0;0;0.707   | [0;0;0.707   |
| [0;-0.2673  | [0;0.7071;0. | [0;-0.5;-0.7 | [0;-0.5;-0.5  | [0;1;0;0]   | [0;-0.7071   | [0;0.7071;0. | [0;0.5257;0. | [0;0.4264;0. |
| [1;0;0;0]   | [1;0;0;0]    | [1;0;0;0]    | [1;0;0;0]     | [1;0;0;0]   | [1;0;0;0]    | [1;0;0;0]    | [1;0;0;0]    | [1;0;0;0]    |
| [0;0.729;-C | [0;-0.707;C  | [0;-0.707;C  | [0;0.707;-C   | [0;0;-0.707 | [0;0.328;0.  | [0;0;-0.851  | [0;0.293;0.  | [0;0.408;0.  |
| [0;-0.663;- | [0;0;0;1]    | [0;0;-0.707  | [0;0.5;0.5;-  | [0;0;0.707; | [0;0.737;-C  | [0;1;0;0]    | [0;0.844;-C  | [0;0.707;-C  |
| [0;0.174;0. | [0;0.707;0.  | [0;0.707;0.  | [0;0.5;0.5;0. | [0;1;0;0]   | [0;0.591;0.  | [0;0;0.526;  | [0;0.449;0.  | [0;0.577;0.  |
| [-0.862;-0. | [-0.975;-0.  | [0.988;0.0   | [0.995;0.0    | [-0.67;-0.3 | [-0.696;-0.  | [-0.727;-0.  | [-0.812;-0.  | [-0.712;-0.  |
| [-0.482;0.7 | [0.209;-0.5  | [0.147;-0.6  | [-0.101;0.6   | [0;0;-0.707 | [0.653;-0.7  | [0.0425;0.4  | [-0.562;0.6  | [0.659;-0.7  |
| [-0.152;-0. | [-0.0719;-C  | [-0.0381;-C  | [0;0.707;-C   | [0.645;-0.7 | [-0.296;-0.  | [0.673;-0.4  | [0.127;0.4   | [-0.242;-0.  |
| [-0.0338;-C | [0;-0.707;C  | [-0.0257;0.  | [-0.0274;-C   | [-0.368;-0. | [-0.0313;0.  | [-0.129;-0.  | [-0.0943;-C  | [0;0;-0.707  |
| [0.973;0.1  | [0.992;0.0   | [0.997;0.0   | [0.998;0.0    | [0.67;0.38  | [-0.722;-0.  | [0.727;0.3   | [0.898;0.2   | [-0.73;-0.6  |
| [0.195;-0.9 | [0;0.707;-C  | [0.00554;0   | [0;0.707;-C   | [0;0;0.707; | [0.652;-0.7  | [0.0425;0.4  | [0.346;-0.8  | [0.675;-0.7  |
| [0.0926;-0. | [-0.125;0.2  | [-0.08;0.35  | [-0.0559;0    | [0.645;-0.7 | [-0.132;0.1  | [0.673;-0.4  | [-0.252;0.1  | [0;0;0.707;  |
| [0.0766;0.3 | [0.0211;0.4  | [0.0206;0.4  | [0.0177;0.4   | [0.368;0.5  | [0.19;0.39   | [0.129;0.6   | [0.102;0.4   | [0.106;0.2   |
| [0;-0.707;C | [0;0.707;0.  | [0;0.465;0.  | [0;0.408;0.   | [0;-1;0;0]  | [0;1;0;0]    | [0;0.707;0;  | [0;0.707;0;  | [0;1;0;0]    |
| [0;-0.753;C | [0;0.707;-C  | [0;0.648;0.  | [0;-0.793;C   | [0;-1;0;0]  | [0;1;0;0]    | [0;0.707;0;  | [0;0.707;0;  | [0;0.816;0.  |
| [0.707;-0.7 | [0;-0.577;-  | [0;0;0.707;  | [0.756;-0.3   | [0;1;0;0]   | [0;-1;0;0]   | [0;0;0.707;  | [0;-0.577;C  | [0;0;0.707;  |
| [0;0.4;0.64 | [0;0.577;0.  | [0.5;-0.5;-C | [0;0.577;0.   | [0;1;0;0]   | [0;-1;0;0]   | [0;0;-0.707  | [0;0.577;-C  | [0;1;0;0]    |
| [0;0.74671  | [0;0.70710   | [0;-1.4424   | [0;0.45749    | [0;0;0.707  | [0;0.59499   | [0;0.49859   | [0;0.68034   | [0;3.64799   |
| [0;-0.8930  | [0.632455    | [0;0.27593   | [0;-0.6074    | [0.377964   | [0.249688    | [0.052925    | [0.250627    | [0.188982    |
| [0.795226   | [0;-0.4574   | [0.758175    | [0.962449     | [0;1;0;0]   | [0;-0.9712   | [0;0.05488   | [0;-0.5829   | [0;-0.9773   |
| [0;-0.3653  | [0;0.70710   | [0;-0.6859   | [0;0.57735    | [0;-1;1.11  | [0;-0.8574   | [0;-0.7105   | [0;-0.6972   | [0;-0.7345   |
| [0;-0.6777  | [0;0.70710   | [0;5.20282   | [0;0.43343    | [0;1;0;0]   | [0;0.78617   | [0;-0.7105   | [0;0.77151   | [0;-1.3303   |
| [0;-0.5139  | [0;-0.6882   | [0;-0.8382   | [0;-0.7071    | [0;-1;1.11  | [0;0.78617   | [0;-0.0548   | [0;0.77459   | [0;0.86602   |
| [0.770491   | [0;0.70710   | [0.878054    | [0.978106     | [0;0;-0.707 | [0;0.90909   | [0.052925    | [0;0.77459   | [0;0.86602   |
| [0;0.64012  | [1.046728    | [0;0.66529   | [0;0.61117    | [0.377964   | [0.321860    | [0;-0.4985   | [0.250627    | [0.288675    |

| 924         | 926          | 972           | 974         | 990          | 2184        | 2186         | 2190        | 2202        |
|-------------|--------------|---------------|-------------|--------------|-------------|--------------|-------------|-------------|
| [0;-0.0804  | [0;0;-0.707  | [0;-0.707;C   | [0;-0.707;C | [0;0.408;0   | [0;0;0;1    | [0;0;0;1     | [0;0;0;1    | [0;0;0.707; |
| [0;-0.0804  | [0;-0.465;C  | [0.687;-0.6   | [0;0.465;-C | [0;-0.793;C  | [0;1;0;0]   | [0;1;0;0]    | [0;0;0;-1]  | [0;1;0;0]   |
| [0.5;-0.5;0 | [0.378;-0.7  | [0;0;0;-0.707 | [0.707;-0.7 | [0.707;-0.7  | [0;0;1;0]   | [0;0;0;-1]   | [0;0;0;-1]  | [0;-1;0;0]  |
| [0;-0.727;- | [0;0.648;0.  | [0;0.707;0.   | [0;0.648;0. | [0;0.577;0.  | [0;-0.577;- | [0;0;0;1]    | [0;0;0;1]   | [0;0;0.707; |
| [0;0.8165;! | [0.2265;0.   | [0;0.5774;!   | [0.3235;0.! | [0.5;0.5;0.! | [0;0;0;1]   | [0;1;0;0]    | [0;0.7071;! | [0;1;0;0]   |
| [0;-0.8165, | [0;0.8814;!  | [0;0.5774;!   | [0;-0.6479, | [0;0.7071;!  | [0;1;0;0]   | [0;0;0;1]    | [0;0;0.707  | [0;0;0.707  |
| [0;0;0.707  | [0;-0.7071   | [0;0;0.707    | [0;-0.4653  | [0;-0.7071   | [0;0;1;0]   | [0;0;0;1]    | [0;0;0;1]   | [0.5547;-0. |
| [0;0;-0.707 | [0;0.1328;!  | [0;0.8165;-   | [0;0.7071;- | [0;0;-0.707  | [0.7559;-0. | [0.6667;-0.  | [0;0;0;-1]  | [0;0;-0.707 |
| [0.5774;0.! | [0.7303;0.!  | [0;0.5774;-   | [0.6804;0.! | [0.866;0.2!  | [0;0;0;1]   | [0;1;0;0]    | [0;0.7071;! | [0;1;0;0]   |
| [0;-0.6755, | [0;-0.5774,  | [0;-0.5774,   | [0;-0.7071, | [0;-0.8881   | [0;1;0;0]   | [0;0;0;1]    | [0;0;0.707  | [0;0;0.707  |
| [0;-0.6755, | [0;0.5774;!  | [0;0;-0.707   | [0;0.4653;- | [0;0;0.707   | [0;0;1;0]   | [0;0;0;-1]   | [0;0;0;1]   | [0.5547;0.! |
| [0;0.5935;! | [0;-0.4082,  | [0;-0.8165,   | [0;0.6479;! | [0;-0.4597,  | [0.7559;0.! | [0.4;0.2;0.! | [0;0;0;-1]  | [0;0;0.707  |
| [1;0;0;0]   | [1;0;0;0]    | [1;0;0;0]     | [1;0;0;0]   | [1;0;0;0]    | [0;0.408;0. | [1;0;0;0]    | [1;0;0;0]   | [1;0;0;0]   |
| [0;0.5;-0.7 | [0;0.707;-C  | [0;0;-0.707   | [0;0.349;0. | [0;0;0.707;  | [0;0.707;-C | [0;0.707;-C  | [0;0.707;-C | [0;0.888;-C |
| [0;-0.707;C | [0;0.5;0.5;  | [0;1;0;0]     | [0;0.894;-C | [0;0.929;-C  | [1;0;0;0]   | [0;0.5;0.5;  | [0;0.577;0. | [0;0;0.707; |
| [0;0.5;0.70 | [0;0.5;0.5;! | [0;0;0.707;   | [0;0.28;0.5 | [0;0.369;0.  | [0;0.577;0. | [0;0.5;0.5;! | [0;0.408;0. | [0;0.46;0.6 |
| [0.797;0.3! | [-0.856;-0.  | [-0.806;-0.   | [0.878;0.2! | [-0.921;-0.  | [-0.532;-0. | [0.391;0.9!  | [-0.591;-0. | [0.369;0.9! |
| [0.575;-0.6 | [-0.496;0.7  | [-0.587;0.5   | [-0.471;0.6 | [-0.381;0.7  | [0;0.781;-C | [-0.408;0.2  | [0;0.707;-C | [0.487;-0.2 |
| [0.167;0.4! | [-0.143;-0.  | [0;0;0.707;   | [-0.0103;0  | [-0.0789;-C  | [0;-0.239;- | [0.076;-0.C  | [0.523;-0.4 | [-0.792;0.2 |
| [-0.0788;-C | [-0.0322;-C  | [-0.0802;-C   | [-0.0805;-C | [0;0;-0.707  | [-0.847;0.3 | [-0.821;0.2  | [-0.614;0.1 | [0;0;-0.707 |
| [0.909;0.2! | [0.962;0.2!  | [0.806;0.3!   | [0.952;0.1! | [-0.985;-0.  | [0.532;-0.4 | [0.359;-0.9  | [0.453;-0.6 | [0.351;-0.9 |
| [-0.369;0.8 | [0.244;-0.9  | [0.587;-0.5   | [-0.295;0.7 | [-0.164;0.8  | [0;0.781;-C | [-0.0726;-C  | [0;0.707;-C | [0;0;0.707; |
| [-0.161;-0. | [0.0938;-0.  | [0;0;0.707;   | [-0.026;0.C | [0;0;0.707;  | [0;0.239;0. | [0.588;0.2!  | [0.726;0.1! | [0.852;0.3! |
| [0.11;0.48! | [0.0748;0.!  | [0.0802;0.!   | [0.0751;0.! | [0.059;0.4!  | [0.847;0.3! | [0.721;0.2!  | [0.518;0.3! | [0.388;0.1! |
| [0.5;-0.5;0 | [0;0.648;0.  | [0;-0.707;C   | [0;-0.707;C | [0;0.577;0.  | [0;0;1;0]   | [0;0;0;1]    | [0;0;0;1]   | [0;1;0;0]   |
| [0;-0.0804  | [0;0;-0.707  | [0;0;-0.707   | [0;0.465;-C | [0;0.408;0.  | [0;-0.577;- | [0;0;0;1]    | [0;0;0;1]   | [0;0;0.707; |
| [0;-0.0804  | [0;-0.465;C  | [0.687;-0.6   | [0;0.648;0. | [0;-0.793;C  | [0;1;0;0]   | [0;1;0;0]    | [0;0;0;-1]  | [0;0;0.707; |
| [0;-0.727;- | [0.378;-0.7  | [0;0.707;0.   | [0.707;-0.7 | [0.707;-0.7  | [0;0;0;1]   | [0;0;0;-1]   | [0;0;0;-1]  | [0;-1;0;0]  |
| [0;-0.0874! | [0;3.71081   | [0;-0.7276!   | [0;0.65394  | [0;2.06966   | [0;0.40824  | [0;-0.4082.  | [0;-0.4082. | [0;-9.5424! |
| [0;-0.0874! | [0;-0.6204!  | [0;-1.1107!   | [0;0.65394  | [0;-0.8739!  | [0;-0.7071! | [0;-0.4082.  | [0;-0.7071! | [0.316227!  |
| [0.620173!  | [0.422890!   | [0.251025!    | [0.830569!  | [0.851256!   | [0.495572!  | [2.417315!   | [7.554110!  | [0;-0.9670! |
| [0;0.70481  | [0;-0.6483   | [0;-0.5773!   | [0;0.58341  | [0;-0.5550!  | [0;0.57735  | [0;0.40824   | [0;0.30151  | [0;-0.2545! |
| [0;0.29770  | [0;0.17722   | [0;-0.5773!   | [0;-0.7040! | [0;0.46499   | [0;-0.5773! | [0;0.70710   | [0;0.17677  | [0;6.11274  |
| [0;0.29770  | [0;-0.8203.  | [0;1.11075    | [0;-0.4476  | [0;-0.7634.  | [0;-0.4082. | [0;0.70710   | [0;0.17677  | [0;0.81649  |
| [0.609271!  | [0.324167!   | [0.251025!    | [0.800272!  | [0.816496!   | [0;-0.7071! | [0;-0.8017!  | [0;-0.7071! | [0.316227!  |
| [0;-0.7773. | [0;0.78600   | [0;0.72760    | [0;0.73043  | [0;0.68599   | [0.495572!  | [0.478091!   | [0.478091!  | [0;0.57735  |

| 2204                    | 2206             | 2252            | 2254            | 2270            | 2458                    | 2462                    | 2506            | 2510            |
|-------------------------|------------------|-----------------|-----------------|-----------------|-------------------------|-------------------------|-----------------|-----------------|
| [0;0;1;0]               | [0;0;0.707;0]    | [0;0;0;1]       | [0;0;0;1]       | [0;0;0.707;0]   | [0;0.577;0.0]           | [0;-0.5;-0.5]           | [0;0.577;-0.0]  | [0;-0.434+0.0]  |
| [0;0;-1;0]              | [0;0.707;-0.0]   | [0;0;1;0]       | [0;0;0;-1]      | [0;0.577;-0.0]  | [0;1;0;0]               | [0;-0.707;0.0]          | [0;0.577;-0.0]  | [0;-0.434-0.0]  |
| [0;0;1;0]               | [0;-0.707;0.0]   | [0;0;-0.707;0]  | [0;0;0;1]       | [0;-0.577;0.0]  | [0;-1;0;0]              | [0.632;-0.3]            | [0.5;-0.5;-0.0] | [0.577;-0.5]    |
| [0;0;-1;0]              | [0;0;0.707;0]    | [0;0;0.707;0]   | [0;0;0;-1]      | [0;0;0.707;0]   | [0;0.577;0.0]           | [0;0.5;0.5;0.0]         | [0;-0.577;-0.0] | [0;-0.548;-0.0] |
| [0;0;1;0]               | [0;0.5774;0.0]   | [0;0;0;1]       | [0;0;0;1]       | [0;0;0.707;0]   | [0;1;0;0]               | [0;-0.628;-0.0]         | [0;-0.5774;0.0] | [0;0.4004;0.0]  |
| [0;0;1;0]               | [0;0;0.850;0]    | [0;0;1;0]       | [0;0;0;1]       | [0;0;0.707;0]   | [0;-0.809;0.0]          | [0;-0.7071;0.0]         | [0.5;-0.5;-0.0] | [0.3162;-0.0]   |
| [0;0;-0.707;0]          | [0.5;-0.5;-0.0]  | [0;0.5774;-0.0] | [0;0;0;1]       | [0;0;0.707;0]   | [0.4082;0.0]            | [0.3922;-0.0]           | [0;-0.2887;0.0] | [0;0.7071;-0.0] |
| [0.5774;-0.0]           | [0;0;-0.525;0.0] | [0;0.5774;-0.0] | [0;0;0;1]       | [0;0;-0.707;0]  | [0;-0.309;-0.0]         | [0;-0.3251;0.0]         | [0;-0.2887;0.0] | [0;-0.7529;0.0] |
| [0;0;1;0]               | [0;0.5774;0.0]   | [0;0;0;1]       | [0;0;0;1]       | [0;0;0.707;0]   | [0;1;0;0]               | [0;-0.628;-0.0]         | [0;0.5774;0.0]  | [0;-0.0692;0.0] |
| [0;0;1;0]               | [0;0;0.850;0]    | [0;0;1;0]       | [0;0;0;-1]      | [0;0.8165;-0.0] | [0;-0.809;0.0]          | [0;-0.7071;0.0]         | [0;0.5774;0.0]  | [0;-0.0692;0.0] |
| [0;0;0.707;0]           | [0.5;0.5;-0.0]   | [0;0.5774;0.0]  | [0;0;0;1]       | [0;-0.8165;0.0] | [0.7071;0.0]            | [0.6325;0.0]            | [0.5;-0.5;-0.0] | [0.7071;-0.0]   |
| [0;0;-0.707;0]          | [0;0;0.525;0.0]  | [0;-0.5774;0.0] | [0;0;0;-1]      | [0;0;0.707;0]   | [0;0.309;0.0]           | [0;0.3251;0.0]          | [0;-0.5774;0.0] | [0;0.6133;0.0]  |
| [1;0;0;0]               | [1;0;0;0]        | [0;0;0.707;0]   | [1;0;0;0]       | [1;0;0;0]       | [1;0;0;0]               | [1;0;0;0]               | [1;0;0;0]       | [1;0;0;0]       |
| [0;0.888;-0.0]          | [0;0.888;-0.0]   | [1;0;0;0]       | [0;0.591;-0.0]  | [0;0.953;-0.0]  | [0;0.707;-0.0]          | [0;0.707;-0.0]          | [0;0.408;0.0]   | [0;-0.153;0.0]  |
| [0;0;0.707;0]           | [0;0.233;0.0]    | [0;0.929;-0.0]  | [0;0.737;0.0]   | [0;0;0.707;0]   | [0;0.325;0.0]           | [0;0.408;0.0]           | [0;0.707;-0.0]  | [0;0.902;-0.0]  |
| [0;0.46;0.6]            | [0;0.397;0.0]    | [0;0.369;0.0]   | [0;0.328;0.0]   | [0;0.303;0.0]   | [0;0.628;0.0]           | [0;0.577;0.0]           | [0;0.577;0.0]   | [0;0.404;0.0]   |
| [-0.589;-0.0]           | [0.59;0.69;0.0]  | [-0.601;-0.0]   | [-0.652;-0.0]   | [-0.69;-0.5]    | [-0.603;-0.0]           | [0.675;0.4]             | [0.637;0.4]     | [-0.685;-0.0]   |
| [-0.0425;0.0]           | [0.283;-0.0]     | [0;0;0.707;0]   | [0.238;-0.0]    | [0.561;-0.0]    | [0.224;-0.0]            | [0;0.707;-0.0]          | [0;0.707;-0.0]  | [0.539;-0.0]    |
| [0.433;-0.3]            | [-0.752;0.3]     | [0;-0.816;0.0]  | [0.44;-0.55]    | [0.458;0.1]     | [-0.765;0.3]            | [0.737;-0.4]            | [0;-0.408;-0.0] | [-0.49;0.59]    |
| [-0.681;0.1]            | [-0.0838;-0.0]   | [-0.799;0.3]    | [-0.57;-0.1]    | [0;0;-0.707;0]  | [-0.0363;-0.0]          | [-0.0349;-0.0]          | [-0.771;0.3]    | [-0.0232;-0.0]  |
| [-0.391;0.0]            | [-0.444;0.0]     | [0.307;0.5]     | [0.311;-0.0]    | [0.74;-0.67]    | [-0.381;0.0]            | [-0.497;0.5]            | [0.92;-0.22]    | [0.754;0.0]     |
| [-0.0619;0.0]           | [0.0188;0.0]     | [0;0;0.707;0]   | [-0.563;0.4]    | [0;0;0.707;0]   | [-0.012;0.4]            | [0;0.707;-0.0]          | [0;-0.0351;0.0] | [-0.458;0.7]    |
| [-0.758;-0.0]           | [-0.855;-0.0]    | [0.806;-0.5]    | [0.669;0.4]     | [-0.638;-0.0]   | [-0.883;-0.0]           | [0.85;0.25]             | [0;0.816;-0.0]  | [-0.415;-0.0]   |
| [0.518;0.3]             | [0.267;0.1]      | [-0.505;-0.0]   | [0.373;0.4]     | [0.212;0.2]     | [0.273;0.2]             | [0.172;0.3]             | [0.392;0.5]     | [0.221;0.6]     |
| [0;0;1;0]               | [0;-0.707;0.0]   | [0;0;0.707;0]   | [0;0;0;1]       | [0;0;0.707;0]   | [0;-1;0;0]              | [0;0.5;0.5;0.0]         | [0;0.577;-0.0]  | [0;-0.548;-0.0] |
| [0;0;-1;0]              | [0;0;0.707;0]    | [0;0;0;1]       | [0;0;0;-1]      | [0;0;0.707;0]   | [0;0.577;0.0]           | [0;-0.5;-0.5]           | [0;0.577;-0.0]  | [0;-0.434+0.0]  |
| [0;0;1;0]               | [0;0.707;-0.0]   | [0;0;1;0]       | [0;0;0;1]       | [0;0.577;-0.0]  | [0;0.577;0.0]           | [0.632;-0.3]            | [0;-0.577;-0.0] | [0;-0.434-0.0]  |
| [0;0;-1;0]              | [0;0;0.707;0]    | [0;0;-0.707;0]  | [0;0;0;-1]      | [0;-0.577;0.0]  | [0;1;0;0]               | [0;-0.707;0.0]          | [0.5;-0.5;-0.0] | [0.577;-0.5]    |
| [0;-0.0788;0.0]         | [0;-0.0638;0.0]  | [0;-0.6391;0.0] | [0;-0.1571;0.0] | [0;8.97336;0.0] | [0;-0.5354;0.0]         | [0;-0.5314;0.0]         | [0;0.57735;0.0] | [0;-0.6200;0.0] |
| [0;-0.0788;0.0]         | [0.102328;0.0]   | [0;-4.2561;0.0] | [0;-0.1571;0.0] | [0.040689;0.0]  | [0;-0.9347;0.0]         | [0;-0.7071;0.0]         | [0;0.57735;0.0] | [0;-0.6200;0.0] |
| [0.251896;0.0]          | [0;-0.7785;0.0]  | [0.246914;0.0]  | [0.136240;0.0]  | [0;-0.8439;0.0] | [0.693375;1.300707;0.0] | [0.802955;0.831933;0.0] | [0.31553;0.0]   | [0;-0.2083;0.0] |
| [0;0.31553;0.0]         | [0;-0.2083;0.0]  | [0;-0.2880;0.0] | [0;0.22056;0.0] | [0;-0.1569;0.0] | [0;0.61175;0.0]         | [0;0.56305;0.0]         | [0;0.57735;0.0] | [0;0.50423;0.0] |
| [0;0.65750;0.0]         | [0;1.16009;0.0]  | [0;0.43301;0.0] | [0;0.34978;0.0] | [0;3.59783;0.0] | [0;0.68824;0.0]         | [0;-0.5998;0.0]         | [0;-0.2886;0.0] | [0;0.26378;0.0] |
| [0;0.44997;0.0]         | [0;0.94280;0.0]  | [0;0.43301;0.0] | [0;0.34978;0.0] | [0;-7.6911;0.0] | [0;0.57735;0.0]         | [0;-0.7071;0.0]         | [0;-0.2886;0.0] | [0;0.26378;0.0] |
| [0;0.44997;0.0]         | [0;0.77151;0.0]  | [0;-2.5961;0.0] | [0;-0.6417;0.0] | [0;-7.6911;0.0] | [0;0.21199;0.0]         | [0.104186;0.0]          | [0;0.57735;0.0] | [0.117723;0.0]  |
| [0.424264;1.820459;0.0] | [0.280567;0.0]   | [0.459967;0.0]  | [0.357142;0.0]  | [0.363803;0.0]  | [0;0.55188;0.0]         | [0.188982;0.0]          | [0;0.68579;0.0] | [0.68579;0.0]   |

2524 2526 3038 4370 4374 4382 4418 4420 4422  
[0;-0.707;C [0;-0.707;C [0;0.408;0. [-0.5;-0.5;- [0.447;0.4 [0.408;0.4 [0.5+8.33e [-0.5;-0.5;C [0.377-0.3  
[0;0;1;0] [0;-0.753;C [0;-0.793;C [1;0;0;0] [1;0;0;0] [-0.211;0.7 [0.5-8.33e [1;0;0;0] [0.377+0.3  
[0;0;1;0] [0.577;0;-C [0.756;-0.3 [0;1;0;0] [-0.678;-0. [0.789;-0.2 [1;0;0;0] [0;0;1;0] [1;0;0;0]  
[0;0.408;0. [0;0.4;0.64 [0;0.577;0. [0.5;0.5;0. [-0.447;-0. [0.408;0.4 [-0.5;-0.5;- [0.5;0.5;0. [-0.481;-0.  
[0;0;1;0] [0;0.4152;C [0;-0.5774; [1;0;0;0] [1;0;0;0] [0.541;0.5 [1;0;0;0] [1;0;0;0] [1;0;0;0]  
[0;0;1;0] [0.127;-0.3 [0;-0.5774; [0;1;0;0] [-0.644;0.5 [-0.2113;0 [0.8605;-0 [0;0;1;0] [-0.6306;0.  
[0;0;1;0] [0;-0.6027 [0;-0.4082; [0.4798;0. [0;-0.7071 [0.7887;-0 [0.2871-0. [-0.5;0.5;-C [0;0.7071;-  
[0;0.7071;C [0;0.4743;C [0;-0.8066; [0.2527;0. [-0.1996;-C [-0.2017;-C [0.2871+0. [0.2236;0. [-0.2265;-C  
[0;0;1;0] [0.7071;-0 [0.9177;-0 [1;0;0;0] [1;0;0;0] [0.541;0.5 [1;0;0;0] [1;0;0;0] [1;0;0;0]  
[0;-0.7071 [0;-0.6823 [0;0.4082;C [0;1;0;0] [0.644;-0.5 [-0.2113;0 [-0.3786+C [0;0;1;0] [-0.3396-0  
[0.7878;-0 [0;-0.6823 [0;-0.4082; [0.4798;0. [0;-0.7071 [0.7887;-0 [-0.3786-0 [0.5;-0.5;-C [-0.3396+C  
[0;0.5774;C [0;0.3589;C [0;0.5774;C [-0.2527;-C [-0.1996;-C [0.2017;0. [0.2984;0. [0.2236;0. [0.2217;0.  
[1;0;0;0] [1;0;0;0] [1;0;0;0] [0.408;0.4 [0.408;0.4 [0.408;0.4 [-0.707;0.7 [-0.707;0.7 [-0.707;0.7  
[0;-0.5;0.7 [0;0.665;-C [0;0.58;0.2 [0.707;-0.7 [0.707;-0.7 [0.707;-0.7 [0;0;1;0] [0;0;-0.707 [0;0;-0.851  
[0;-0.707;C [0;0.584;0. [0;0.575;-C [0;0;0;1] [0;0;0;1] [0.577;0.5 [0;0;0;1] [0;0;0.707; [0.707;0.7  
[0;0.5;0.7 [0;0.466;0. [0;0.577;0. [0.577;0.5 [0.577;0.5 [0;0;0;1] [0.707;0.7 [0.707;0.7 [0;0;0.526;  
[0.695;0.4 [0.745;0.4 [-0.799;-0. [0.61;0.61; [0.903;0.2 [0.541;0.5 [0.814;0.2 [0.602;0.3 [0.897;0.2  
[0.62;-0.11 [0.666;-0.5 [0.601;-0.4 [0.707;-0.7 [0.395;-0.6 [-0.0481;0 [0.504;-0.6 [0.683;-0.1 [0.381;-0.5  
[0.365;-0.5 [0.0425;0. [0;-0.533;- [-0.287;-0. [0;0.707;-C [-0.815;0.3 [0.042;0.6 [-0.372;0.6 [-0.126;0.6  
[0;-0.707;C [-0.017;-0. [0;0.619;-C [-0.213;-0. [-0.171;-0. [-0.202;-0. [-0.285;-0. [-0.181;-0. [-0.187;-0.  
[-0.744;-0. [-0.937;0.2 [0.993;-0. [0.61;0.61; [0.903;0.2 [0.541;0.5 [-0.923;0. [0.602;0.3 [-0.948;-0.  
[0.544;-0.6 [-0.305;-0. [0;-0.0195; [0.707;-0.7 [0.395;-0.6 [-0.0481;0 [0.112;0.7 [0.683;-0.1 [0.0987;0.  
[-0.322;-0. [-0.0748;-C [0;-0.816;C [-0.287;-0. [0;0.707;-C [-0.815;0.3 [0.262;-0.4 [0.372;-0.6 [0.248;-0.7  
[0.217;0.6 [0.152;0.4 [0.118;0.5 [0.213;0.2 [0.171;0.2 [0.202;0.2 [0.258;0.4 [0.181;0.6 [0.176;0.4  
[0;0;1;0] [0;0.4;0.64 [0;0.408;0. [-0.5;-0.5;- [0.447;0.4 [0.789;-0.2 [0.5-8.33e [1;0;0;0] [-0.481;-0.  
[0;0.408;0. [0;-0.707;C [0;0.577;0. [0.5;0.5;0. [-0.678;-0. [-0.211;0.7 [-0.5;-0.5;- [0;0;1;0] [0.377-0.3  
[0;-0.707;C [0.577;0;-C [0;-0.793;C [0;1;0;0] [-0.447;-0. [0.408;0.4 [1;0;0;0] [0.5;0.5;0. [0.377+0.3  
[0;0;1;0] [0;-0.753;C [0.756;-0.3 [1;0;0;0] [1;0;0;0] [0.408;0.4 [0.5+8.33e [-0.5;-0.5;C [1;0;0;0]  
[0;0.7071 [0;-0.7975 [0;0.40824 [-0.5;-0.5;- [-0.50000 [0.5;0.5;0. [0.943119 [-0.5;-0.5;C [-0.528462  
[0;-0.2557 [0;-0.7975 [0;-0.5795 [-0.92582 [0.614086 [0.520751 [0.142764 [-0.528462  
[0.188982 [0.830105 [0.956324 [0.150344 [0;-0.7071 [-0.072029 [0.520751 [0.142764 [0.959166  
[0;-0.4608 [0;0.43880 [0;0.57735 [-0.55470 [0.524142 [-0.5;-0.5;- [-0.590209 [0.5;0.5;0. [-0.508977  
[0;-0.7071 [0;0.69356 [0;0.40824 [0.554700 [-0.524142 [0.5;0.5;0. [0.566946 [-0.5;-0.5;C [0.539359  
[0;0.35355 [0;-0.4397 [0;-0.8065 [0.925820 [0.956182 [0.072029 [0.566946 [-0.142764 [0.301511  
[0;0.35355 [0.159403 [0.5;-0.5;-C [0.150344 [0;-0.7071 [-0.614086 [0.923099 [-0.142764 [-0.943879  
[0.449013 [0;0.39374 [0;0.57735 [0.5;0.5;0. [0.500000 [-0.5;-0.5;- [0.499999 [0.5;0.5;0. [0.539359

4424 4426 4428 4430 4434 4436 4438 4440 4442  
 [-0.5;-0.5;C [0.377-0.3 [0.471;0.4 [-0.5;-0.5;C [0.548-2.2 [-0.577;-0. [-0.577;-0. [-0.577;-0. [-0.577;-0.  
 [0;0;1;0] [0.377+0.3 [0;0;1;0] [-0.447;-0. [0.548+2.2 [1;0;0;0] [-0.602;-0. [0;0;1;0] [-0.602;-0.  
 [0;0;-1;0] [0.707;0;-C [0;0;-1;0] [0.707;0;-C [1;0;0;0] [0;0;1;0] [1;0;0;0] [0;0;-1;0] [0.707;0;-C  
 [0.5;0.5;0. [0.481;0.4 [-0.471;-0. [-0.447;-0. [0.383;0.3 [0.378;0.3 [0.372;0.3 [0.378;0.3 [-0.372;-0.  
  
 [0;0;1;0] [0.4881;0. [0;0;1;0] [0.7343;0. [1;0;0;0] [1;0;0;0] [1;0;0;0] [-0.2689;-C [-0.5492;-C  
 [-0.329;-0. [-0.7071;0 [0.7153;0. [-0.7071;0 [-0.4326;0 [0;0;1;0] [-0.378;0.3 [0;0;1;0] [-0.5774;0.  
 [0;0.7071;- [0.4243;0. [0.4;-0.751 [0;-0.7071 [-0.2774;-C [0.1012;-0 [0.08237;0 [0;0;1;0] [0.2887;0.  
 [0.4582;0. [0.3715;0. [-0.2912;-C [0.2518;0. [-0.245;-0. [0.2272;0. [-0.1938;-C [0.3498;0. [-0.2525;-C  
  
 [0;0;1;0] [-0.1963+C [0;0;1;0] [0.7071;0; [1;0;0;0] [1;0;0;0] [1;0;0;0] [-0.4896;-C [-0.5774+3  
 [-0.329;-0. [-0.1963-0 [-0.7153;-C [-0.7071;0 [-0.2706+C [0;0;1;0] [0.1665+0. [0;0;1;0] [-0.5774-3  
 [0;0.7071; [-0.7071;0 [0.4;-0.751 [-0.5706;0 [-0.2706-0 [0.2783;-0 [0.1665-0. [0;0;-1;0] [-0.444;-0.  
 [-0.4582;-C [-0.3402;-C [-0.2912;-C [-0.243;-0. [0.1982;0. [-0.2037;-C [0.1752;0. [-0.319;-0. [-0.2299;-C  
  
 [-0.707;0.7 [-0.707;0.7 [-0.707;0.7 [-0.707;0.7 [0.707;-0.7 [-0.316;-0. [0.707;-0.7 [0.707;-0.7 [0.707;-0.7  
 [0;0;1;0] [0;0;1;0] [0;0;-0.851 [0;0;-0.924 [0.5;0.5;-0 [0.707;-0.7 [-0.408;-0. [0.5;0.5;-0 [0.5;0.5;-0.  
 [0;0;0;1] [0.707;0.7 [0.707;0.7 [0.707;0.7 [0;0;0;1] [-0.447;-0. [-0.408;-0. [0;0;0;1] [0;0;0;1]  
 [0.707;0.7 [0;0;0;1] [0;0;0.526; [0;0;0.383; [0.5;0.5;0. [0.447;0.4 [0.408;0.4 [0.5;0.5;0. [0.5;0.5;0.

[-0.196;-0. [0.465;0.5 [0.127;0.3 [0.601;0.4 [-0.926;-0. [0.94;0.14 [0.948;0.1 [0.564;0.5 [-0.623;-0.  
 [0.797;-0. [0.816;-0.4 [-0.855;-0. [0.738;-0.2 [0.289;-0.8 [-0.239;0.5 [0.272;-0.6 [0.748;-0.5 [0.716;-0.6  
 [-0.311;0.7 [0.0212;0. [-0.413;0.7 [-0.189;0.7 [-0.148;-0. [-0.144;0.6 [-0.00424; [-0.0409;-C [-0.197;-0.  
 [-0.479;-0. [-0.344;-0. [-0.287;-0. [-0.242;-0. [-0.191;-0. [-0.196;-0. [-0.165;-0. [-0.349;-0. [-0.244;-0.

[0.196;0.5 [-0.884;-0. [0.127;0.3 [-0.905;-0. [0.955;-0. [-0.951;-0. [0.966;0.0 [-0.733;-0. [0.913;0.1  
 [-0.797;0. [0.0398;0. [-0.855;-0. [0.141;0.5 [-0.022;-0. [-0.0121;0 [0.00514;0 [-0.486;0.5 [0.0961;-0.  
 [0.311;-0.7 [0.322;-0.5 [0.413;-0.7 [0.325;-0.7 [0.235;-0.1 [0.254;-0.7 [0.211;-0.5 [0.338;-0.5 [0.318;-0.2  
 [0.479;0.3 [0.337;0.2 [0.287;0.4 [0.235;0.3 [0.182;0.2 [0.178;0.4 [0.15;0.33 [0.335;0.2 [0.238;0.2

[0;0;1;0] [0.377-0.3 [-0.471;-0. [0.707;0;-C [0.548-2.2 [0;0;1;0] [-0.602;-0. [0;0;-1;0] [-0.577;-0.  
 [0;0;-1;0] [0.377+0.3 [0;0;-1;0] [-0.5;-0.5;C [0.548+2.2 [0.378;0.3 [0.372;0.3 [0.378;0.3 [-0.602;-0.  
 [0.5;0.5;0. [0.707;0;-C [0.471;0.4 [-0.447;-0. [0.383;0.3 [-0.577;-0. [-0.577;-0. [-0.577;-0. [0.707;0;-C  
 [-0.5;-0.5;C [0.481;0.4 [0;0;1;0] [-0.447;-0. [1;0;0;0] [1;0;0;0] [1;0;0;0] [0;0;1;0] [-0.372;-0.

[-0.5;-0.5;C [-0.336123 [-0.536691 [-0.54015C [0.527459 [-0.57735C [0.605012 [0.607896 [0.600985  
 [0.087705 [-0.336123 [0.049088 [-0.54015C [0.527459 [-0.843742 [0.605012 [0.063245 [0.600985  
 [0;0;1;0] [0.774596 [-0.217207 [-0.762492 [-0.963363 [-0.843742 [0.971859 [3.291061 [-0.83666C  
 [0.588348 [-0.583963 [-0.502682 [-0.503719 [-0.448901 [-0.412393 [-0.406587 [0.447374 [0.449266

[0.588348 [0.595978 [0.502682 [-0.534315 [0.589367 [0.625543 [-0.580263 [0.595625 [0.537595  
 [0;0;1;0] [0.595978 [0.217207 [-0.196532 [0.707106 [-0.377964 [0.478373 [3.285631 [0.637945  
 [-0.087705 [0.718184 [-0.049088 [0.746830 [0.956523 [-0.377964 [0.965200 [-0.176166 [0.801783  
 [0.5;0.5;0. [0.541858 [0.536691 [-0.558367 [-0.424264 [-0.95980C [0.452527 [0.422976 [0.444451

4444 4446 4546 4548 4550 4556 4558 4562 4564  
 [0.495;0.4] [-0.473;-0. [-0.202+0. [-0.378;-0. [0.263-0.2 [0.408;0.4 [-0.322+0. [-0.0533+C [-0.5;-0.5;C  
 [0;0;1;0] [-0.421;-0. [-0.202-0.3 [0;0;1;0] [0.263+0.2 [0;0;1;0] [-0.322-0.2 [-0.0533-0 [0;0;1;0]  
 [0;0;-1;0] [0.707;0;-C [0.707;-0.7 [0;0;-1;0] [-0.577;0.5 [0.642;-0.6 [0.707;-0.7 [0.707;-0.7 [0;0;-1;0]  
 [-0.38;-0.3 [-0.356;-0. [-0.405;-0. [0.378;0.3 [-0.407;-0. [-0.408;-0. [-0.395;-0. [-0.322;-0. [0.289;0.2  
  
 [0.4881;0. [-0.8194;-C [-0.508;-0. [0;0;1;0] [-0.683;-0. [0;0;1;0] [0.3987;0. [-0.5615;-C [0.7071;0;  
 [0;0;1;0] [-0.459;0.3 [-0.7071;0. [0;0;1;0] [-0.6938;0 [0;0;1;0] [-0.7071;0 [-0.7071;0 [0.809;-0.5  
 [-0.182;0.4 [0.1029;0. [-0.1114-0 [0;0;1;0] [0.212+0.1 [0.7071;-0. [0.3028;0. [-0.4082;-C [0;0;1;0]  
 [0.2453;0. [-0.1984;-C [-0.1114+C [0.2981;0. [0.212-0.1 [-0.3939;-C [0.337;0.3 [-0.3366;-C [0.309;0.5;  
  
 [-0.8797;-C [0.9347;0. [0.7071;-0. [0;0;1;0] [-0.464+0. [0;0;1;0] [-0.1903+C [0.7071;-0 [0.7071;0;  
 [0;0;1;0] [-0.2339-0 [-0.3162+C [0;0;-1;0] [-0.464-0.1 [0;0;1;0] [-0.1903-0 [-0.3636+C [0.5721;-0.  
 [-0.2533;0 [-0.2339+C [-0.3162-0 [0;0;1;0] [0.594;-0.7 [0.7071;-0. [0.7071;-0. [-0.3636-0 [0;0;1;0]  
 [0.2349;0. [0.1883;0. [-0.3162;-C [0.2981;0. [0.2707;0. [-0.3939;-C [-0.3016;-C [-0.1828;-C [-0.2185;-C  
  
 [0.707;-0.7 [0.707;-0.7 [-0.707;0.7 [-0.707;0.7 [-0.707;0.7 [-0.707;0.7 [-0.707;0.7 [0.707;-0.7 [0.707;-0.7  
 [-0.408;-0. [-0.447;-0. [0;0;0;1] [0;0;0.526; [0;0;-0.707 [0;0;-0.707 [0;0;-0.788 [0.577;0.5 [-0.302;-0.  
 [-0.408;-0. [-0.447;-0. [0;0;1;0] [0.707;0.7 [0.707;0.7 [0.707;0.7 [0.707;0.7 [0;0;0;1] [-0.523;-0.  
 [0.408;0.4 [0.316;0.3 [0.707;0.7 [0;0;-0.851 [0;0;0.707 [0;0;0.707 [0;0;0.615; [0.408;0.4 [0.368;0.3  
  
 [0.651;0.4 [0.8;0.382; [0.535;0.5 [-0.588;-0. [0.698;0.4 [0.501;0.5 [0.562;0.5 [-0.585;-0. [0.709;0.4;  
 [0.695;-0.3 [0.566;-0.6 [0.707;-0.7 [-0.74;0.6C [0.667;-0.6 [0.282;0.2 [0.707;-0.7 [0.707;-0.7 [0.663;-0.6  
 [-0.177;0.7 [-0.00233; [-0.448;-0. [-0.208;-0. [0.141;0.3 [0.707;-0.7 [-0.286;-0. [-0.385;-0. [0.109;0.3;  
 [-0.248;-0. [-0.198;-0. [-0.116;-0. [-0.252;-0. [-0.218;-0. [-0.412;-0. [-0.32;-0.3 [-0.0997;-C [-0.214;-0.  
  
 [-0.905;-0. [0.932;0.1 [0.612;0.6 [0.588;0.4 [0.873;0.3 [0.501;0.5 [0.621;0.6 [-0.661;-0. [0.843;0.3;  
 [0.063;0.4 [0.00321;0 [0.707;-0.7 [0.74;-0.6C [0.434;-0.8 [-0.282;-0. [0.707;-0.7 [0.707;-0.7 [0.471;-0.8  
 [0.351;-0.7 [0.31;-0.57 [0.159;0.1 [0.208;0.0 [-0.0483;0 [0.707;-0.7 [-0.124;-0. [-0.137;-0. [0.122;-0.1  
 [0.234;0.3 [0.187;0.2 [0.316;0.3 [0.252;0.6 [0.216;0.4 [0.412;0.4 [0.314;0.3 [0.211;0.2 [0.229;0.4  
  
 [0.495;0.4 [-0.473;-0. [0.707;-0.7 [0;0;1;0] [0.263-0.2 [0;0;1;0] [-0.322+0. [-0.322;-0. [0;0;-1;0]  
 [0;0;-1;0] [-0.421;-0. [-0.405;-0. [0;0;-1;0] [0.263+0.2 [0.408;0.4 [-0.322-0.2 [-0.0533+C [0.289;0.2;  
 [-0.38;-0.3 [0.707;0;-C [-0.202+0. [0.378;0.3 [-0.577;0.5 [0.642;-0.6 [0.707;-0.7 [-0.0533-0 [-0.5;-0.5;C  
 [0;0;1;0] [-0.356;-0. [-0.202-0.3 [-0.378;-0. [-0.407;-0. [-0.408;-0. [-0.395;-0. [0.707;-0.7 [0;0;1;0]

[-0.561011 [-0.572752 [-0.267261 [0.437736 [-0.298809 [0.5;0.499 [-0.356473 [0.316946 [0.574740  
 [-0.075918 [-0.580141 [-0.267261 [-0.403034 [-0.298809 [-0.404113 [-0.356473 [0.316946 [0.429805  
 [-0.145453 [0.838884 [0.707106 [0.331862 [-0.519655 [0.785772 [0.707106 [-0.707106 [-0.278148  
 [-0.41763C [-0.407841 [0.457495 [-0.389541 [-0.436819 [-0.392232 [-0.409918 [0.378175 [-0.345967

[0.570605 [-0.535755 [-0.196287 [0.389541 [-0.32136C [0.392232 [0.427034 [0.625673 [0.603703  
 [-0.249298 [0.318532 [-0.196287 [-0.331862 [-0.32136C [0.404113 [0.162533 [0.625673 [-0.288675  
 [-0.139177 [-0.825246 [-0.707106 [0.403034 [-0.847318 [-0.785772 [-0.707106 [-0.707106 [-0.377964  
 [0.451301 [-0.461911 [0.462020 [-0.437736 [0.500406 [-0.5;-0.49 [0.522567 [0.395808 [-0.377964



4566 4572 4574 4678 4682 4686 4692 4694 4698  
[-0.224+0. [0.49;0.49; [0.5;0.5;-0 [0;0.707;-C [0.707;0;0; [0.707;0;0; [0.602;0.0 [0;0.707;-C [-0.372;0.3  
[-0.224-0.4 [0;0;1;0] [0.5;0.5;-0 [1;0;0;0] [0.707;0;0; [0;-0.707;C [0.602;0.0 [-0.602;-0. [-0.602;-0.  
[0.577;-0.5 [0.444;-0.4 [-0.707;0.7 [-1;0;0;0] [0.707;0;0; [0.707;0;0; [1;0;0;0] [1;0;0;0] [0.602;-0.6  
[-0.322;-0. [-0.319;-0. [-0.316;-0. [0.632;0.3 [-0.707;0;C [-0.707;0;C [-0.298;-0. [0.372;0.3 [0.372;0.3  
[-0.8071;-C [0.2465;0. [0.441;0.4 [1;0;0;0] [-0.8507;0 [-0.9239;0 [1;0;0;0] [1;0;0;0] [-0.6015;-C  
[-0.6751;0 [0.5846;-0 [-0.7071;0 [-0.6325;0 [0.8507;0; [-0.8165;0 [0.5227;-0 [0.5;-0.5;-C [0.6768;-0.  
[-0.2116;-C [0;0;1;0] [-0.2198;-C [-0.4472;0 [0.5257;0; [-0.7071 [0.2293-0. [0.189;0.5 [-0.3717;-C  
[0.2467;0. [-0.3238;-C [0.2488;0. [-0.7071 [-0.5257;0 [0.3827;0; [-0.2293+0. [-0.1015;0 [-0.2049;0.  
[-0.6559;0 [-0.425;-0. [0.6126;0. [1;0;0;0] [-0.8507;0 [-0.9239;0 [1;0;0;0] [1;0;0;0] [-0.6015;0.  
[-0.6559;0 [0.6841;-0 [0.4082-1. [0;0.7071; [-0.8507;0; [-0.7071 [-0.3797+C [0.2199;-0 [0.6768;0.  
[0;-0.7071 [0;0;1;0] [0.4082+1. [0.4472;0; [-0.5257;0; [-0.4264;0 [-0.3797-0 [0.3333;-0 [0.3717;-0.  
[-0.1861;-C [-0.2832;-C [0.2132;0. [0.2626;0. [-0.5257;0 [0.3827;0; [-0.1236;-C [-0.1519;-C [0.2049;0.  
[0.707;-0.7 [-0.316;-0. [0.707;-0.7 [0;0.577;0 [0;0.851;0 [0;0.628;0 [-0.577;0;C [-0.5;0.5;0 [-0.851;0;C  
[-0.461;-0. [0.707;-0.7 [-0.395;-0. [0;0.707;-C [0;0;-1;0] [0;0.707;-C [0;-1;0;0] [0.653;0.6 [0;0.851;0;  
[-0.408;-0. [0.577;0.5 [-0.545;-0. [1;0;0;0] [1;0;0;0] [1;0;0;0] [-0.707;0;C [-0.5;0.5;-C [0;0.526;0;  
[0.347;0.3 [0.258;0.2 [0.217;0.2 [0;0.408;0 [0;0.526;0 [0;0.325;0 [0.408;0;0 [0.271;0.2 [-0.526;0;-  
[-0.787;-0. [0.565;0.5 [0.598;0.5 [-0.885;-0. [-0.547;-0. [0.755;0.3 [-0.902;-0. [-0.933;-0. [-0.602;-0.  
[0.571;-0.7 [0.707;-0.7 [0.707;-0.7 [-0.387;0.6 [0.646;-0.6 [0.563;-0.5 [0.33;-0.65 [0.298;-0.7 [0.677;-0.6  
[-0.188;-0. [-0.281;-0. [-0.303;-0. [-0.257;-0. [-0.437;-0. [0;0.707;-C [-0.277;-0. [-0.155;-0. [-0.372;-0.  
[-0.143;-0. [-0.318;-0. [-0.225;-0. [0;-0.707;C [-0.303;0.3 [-0.336;-0. [-0.0324;0 [-0.132;0.2 [-0.205;0.2  
[-0.946;-0. [0.62;0.62; [0.665;0.6 [-0.928;-0. [0.547;-0.5 [-0.909;-0. [-0.932;-0. [-0.958;-0. [-0.602;0.6  
[-0.272;0.9 [0.707;-0.7 [0.707;-0.7 [0;0.707;-C [-0.646;-0. [0;0.707;-C [-0.0634;0 [0.0133;0.1 [0.677;0.6  
[-0.00533; [0.123;0.1 [0.0227;0. [0.359;-0.3 [0.437;-0.4 [0.335;-0.5 [0.336;-0.4 [0.264;-0.4 [0.372;-0.3  
[0.176;0.3 [0.318;0.3 [0.24;0.24; [0.094;0.5 [0.303;0.3 [0.248;0.3 [0.122;0.5 [0.114;0.3 [0.205;0.2  
[-0.224-0.4 [0.49;0.49; [0.5;0.5;-0 [1;0;0;0] [-0.707;0;C [0.707;0;0; [1;0;0;0] [1;0;0;0] [-0.372;0.3  
[0.577;-0.5 [0.444;-0.4 [-0.707;0.7 [-1;0;0;0] [0.707;0;0; [0;-0.707;C [-0.298;-0. [-0.602;-0. [0.372;0.3  
[-0.322;-0. [-0.319;-0. [0.5;0.5;-0 [0.632;0.3 [0.707;0;0; [0.707;0;0; [0.602;0.0 [0.372;0.3 [-0.602;-0.  
[-0.224+0. [0;0;1;0] [-0.316;-0. [0;0.707;-C [0.707;0;0; [-0.707;0;C [0.602;0.0 [0;0.707;-C [0.602;-0.6  
[-0.539628 [0.562561 [0.598687 [-1.150973 [0.650442 [-2.791275 [0.654130 [-0.281439 [0.438774  
[-0.539628 [-0.04576C [0.598687 [-0.942809 [0.650442 [0.834314 [0.654130 [-0.638209 [0.651484  
[-0.60636C [-0.04576C [0.707106 [1;0;0;0] [0.783671 [-0.877154 [0.945586 [-0.964053 [-0.683723  
[-0.359521 [-0.341744 [0.342603 [-0.439941 [0.576605 [-0.516397 [0.358437 [-0.362145 [-0.406762  
[-0.617091 [0.550412 [-0.559357 [-4.114338 [-0.576605 [0.734803 [-0.34641C [0.317180 [0.406762  
[-0.614654 [0.777737 [0.306273 [1;0;0;0] [0.783671 [5.582550 [-0.34641C [-0.619948 [-0.683723  
[0.864594 [-0.482886 [0.707106 [0.925820 [-0.650442 [-0.730654 [0.936632 [-0.952921 [0.651484  
[0.427253 [-0.397647 [0.444391 [0.925820 [-0.650442 [-0.730654 [0.208514 [0.449300 [-0.438774

4700 4702 4740 4742 4748 4750 4758 4764 4766  
 [0.295-0.3 [-0.254;0.5 [-0.5;-0.5;C [-0.376;-0. [-0.526;-0. [0.5;0.5;-0 [-0.602;-0. [-0.707;0;C [0.707;0;0;  
 [0.295+0.3 [0;0.707;-C [-0.5;0.5+7 [-0.12-0.4E [-0.413+7. [0.366+0.2 [-0.5-5.55E [-0.395+0. [-0.402-0.1  
 [0.717;-0.5 [0.799;-0.4 [-0.5;0.5-7 [-0.12+0.4E [-0.413-7.4 [0.366-0.2 [-0.5+5.55E [-0.395-0. [-0.402+0.1  
 [-0.353;-0. [0.379;0.3 [0.5;0.5;0. [-0.376;-0. [-0.413-7.4 [0.511;0.2 [-0.602;-0. [-0.395-0. [-0.402+0.1  
 [-0.7408;-C [-0.8909;-C [-0.5;-0.5;- [-0.637;-0. [-0.3213;-C [-0.3948;-C [0.6015;0. [-0.2589;-C [0.3025;0.1  
 [-0.5774;0 [-0.6193;0 [-0.5-2.22E [0.06984-C [-0.2976+C [0;-0.7071 [-0.6606;0 [-0.2011+C [-0.5018;0.  
 [-0.2597+C [-0.0959;-C [-0.5+2.22E [0.06984+ [-0.2976-0 [0;0.7071; [-0.3717;-C [-0.2011-0 [0.2132;0.4  
 [-0.2597-0 [-0.2068;0 [-0.5;-0.5;C [0;-0.7071 [-0.6323;-C [-0.5281;-C [-0.2523;0 [0.5299;-0 [-0.3314;0.  
 [-0.7988;0 [-0.9264;0 [-0.5;-0.5;C [-0.5251;-C [-0.3213;-C [0.3065;0. [-0.6768;-C [0.5774;0. [-0.4082;0.1  
 [-0.5774;0 [0.1715;-0 [-0.5-2.22E [0.1533-0. [-0.2976+C [-0.1683+C [-0.25+0.4 [-0.2631+C [0.5895;-0.  
 [0.3786;-0 [-0.3268;0 [-0.5+2.22E [0.1533+0 [-0.2976-0 [-0.1683-0 [-0.25-0.4E [-0.2631-0 [0.5895;-0.  
 [0.2544;0. [-0.2064;-C [0.5;0.5;0. [-0.402;-0. [-0.6323;-C [0.4509;0. [-0.2049;-C [-0.3763;-C [-0.2611;-C  
 [-0.737;0;C [-0.655;0.4 [1;0;0;0] [0;0.851;0; [0;0;-0.851 [0;0.628;0 [-0.851;0;C [-0.737;0;C [-0.655;0.4  
 [0;-1;0;0] [0.498;0.8 [0;1;0;0] [0;0;-1;0] [0;1;0;0] [0;0.707;-C [0;0.851;0; [0;-1;0;0] [0.498;0.8  
 [-0.591;0;- [-0.542;0.3 [0;0;1;0] [1;0;0;0] [1;0;0;0] [1;0;0;0] [0;0.526;0; [-0.591;0;- [-0.542;0.3  
 [0.328;0;0 [0.168;0.2 [0;0;0;1] [0;0.526;0; [0;0;0.526; [0;0.325;0 [-0.526;0;- [0.328;0;0 [0.168;0.2  
 [-0.74;-0.4 [-0.826;-0. [0.5;0.5;0. [-0.606;-0. [-0.458;-0. [-0.463;-0. [-0.602;-0. [0.429;0.6 [0.414;0.7  
 [0.577;-0.5 [0.498;-0.7 [0;0;-0.707 [0.637;-0.7 [0.542;-0.2 [-0.644;0.6 [0.7;-0.7;-C [0.685;-0.6 [0.744;-0.5  
 [0.0149;-0 [-0.14;-0.5 [0.707;-0.7 [-0.464;-0. [0.252;-0.7 [0.382;0.2 [-0.372;-0. [0.355;0.3 [-0.458;-0.  
 [0.344;0.1 [-0.222;0.C [-0.5;-0.5;C [-0.111;0.1 [-0.659;-0. [-0.475;-0. [-0.0981;0 [-0.471;-0. [-0.257;0.C  
 [-0.912;-0. [-0.939;-0. [0.5;0.5;-0 [0.58;0.68 [0.458;0.5 [0.371;0.8 [-0.677;-0. [0.396;0.8 [-0.283;-0.  
 [-0.0298;0 [0.0439;0. [0;0;-0.707 [0.747;-0.6 [0.542;-0.2 [-0.801;0.4 [0.694;-0.6 [0.786;-0.4 [-0.887;0.2  
 [0.315;-0.6 [0.284;-0.4 [0.707;-0.7 [0.157;-0.1 [0.252;-0.7 [-0.157;0.3 [-0.134;0.1 [-0.115;0.3 [-0.202;0.2  
 [0.262;0.3 [0.189;0.2 [0.5;0.5;0. [0.285;0.3 [0.659;0.1 [0.443;0.1 [0.205;0.2 [0.461;0.1 [0.303;0.1  
 [0.295-0.3 [-0.254;0.5 [-0.5;-0.5;C [-0.12+0.4E [-0.526;-0. [0.366-0.2 [0.372;0.3 [-0.37;-0.4 [-0.366;-0.  
 [0.717;-0.5 [0.379;0.3 [-0.5;0.5+7 [0.526;0.3 [0.526;0.3 [0.5;0.5;-0 [-0.5-5.55E [-0.707;0;C [0.707;0;0;  
 [0.295+0.3 [0.799;-0.4 [-0.5;0.5-7 [-0.12-0.4E [-0.413+7. [0.366+0.2 [-0.5+5.55E [-0.395+0. [-0.402-0.1  
 [-0.353;-0. [0;0.707;-C [0.5;0.5;0. [-0.376;-0. [-0.413-7.4 [0.511;0.2 [-0.602;-0. [-0.395-0. [-0.402+0.1  
 [0.554504 [-0.050835 [-0.5;-0.5;C [-0.438293 [0.604466 [0.523391 [-0.651484 [-0.797578 [-0.819103  
 [0.554504 [-0.050835 [-0.5;0.5+4 [0.608406 [-0.347105 [0.378777 [0.5;-0.5-4 [-0.280744 [0.349660  
 [-0.824253 [0.904203 [-0.5;0.5-4 [0.608406 [-0.347105 [0.378777 [0.5;-0.5+4 [-0.280744 [0.349660  
 [-0.409064 [0.388407 [0.5;0.5;0. [-0.536335 [0.477449 [0.469718 [-0.406762 [-0.398515 [0.380536  
 [0.365621 [-0.42811E [-0.5;-0.5;C [-0.410785 [-0.477445 [0.543285 [0.572860 [-0.73404C [0.622983  
 [0.365621 [0.223448 [0.5;-0.5+1 [-0.410785 [-0.347105 [-0.105487 [0.681552 [0.452058 [0.116331  
 [-0.870343 [-0.91287C [0.5;-0.5-1 [-0.148991 [-0.347105 [-0.105487 [-0.683723 [0.452058 [0.116331  
 [-0.313496 [-0.52023C [0.5;0.5;0. [-0.608435 [0.604466 [0.671453 [0.438774 [-0.423338 [0.478535

4812 4814 4830 4946 4950 4952 4954 4958 4994  
 [0.408;0.4[0;0.707;-C [-0.639;-0. [-0.577;0;- [-0.378;-0. [0;-0.707;C [0.562;0.3: [-0.506;-0. [0.5;0.25+(-  
 [-0.707;0.7[0.447;-0.7[0.0802;-0. [0.773;0.2(-0.493;0.1[-0.632;-0. [-0.577;-0. [0;-0.707;C [0.5;0.25-C  
 [0.707;-0.7[0.707;-0.7[0.707;-0.7[1;0;0;0] [1;0;0;0] [0;0.707;0.[-0.634;0.5[-0.815;0.3[0;1;0;0]  
 [-0.408;-0. [0.447;0.2 [-0.316;-0. [0.24;0.62(-0.277;0.5[0;0.707;0.[-0.264;-0. [-0.282;-0. [-0.378;-0.

[0.4082;0.4[0.5426;0.4[-0.5;-0.5;- [1;0;0;0] [1;0;0;0] [-0.5615;-C [0.7701;0.4[0.8925;0.4[-0.3589;-C  
 [0.7071;-0. [-0.7071;0 [-0.7071;0 [-0.2582;0 [-0.3408;0 [0;-0.7071 [-0.2944;0 [0.4076;-0 [0;1;0;0]  
 [-0.7071;0 [0.01855-C [-0.3162;-C [-0.2294;-C [0;0.7071;- [0;0.7071;- [0.2028;0.4[0;0.7071;- [0.3484-0.4  
 [-0.4082;-C [0.01855+(-0.2236;0 [-0.1741;0 [-0.1845;-C [-0.3366;-C [0.2327;0.4[-0.1934;-C [0.3484+0.

[0.4082;0.4[-0.3172;-C [0.6165;0.4[1;0;0;0] [1;0;0;0] [-0.9015;-C [0.9351;0.4[-0.9585;-C [0;1;0;0]  
 [-0.7071;0 [0.7071;-0 [0.7071;-0 [0.3007;0.4[0;-0.7071 [0;-0.7071 [-0.2695;-C [0;0.7071;- [-0.5878;-C  
 [-0.7071;0 [0.6821;-0 [0.5;-0.5;-C [-0.3333;0 [0.2638;-0 [0;-0.7071 [-0.2478;0 [-0.2358;0 [-0.5878;-C  
 [0.4082;0.4[-0.3555;-C [0.1911;0.4[0.1126;0.4[-0.1295;-C [0.1156;0.4[-0.1746;-C [0.1603;0.4[0.3349;0.4

[0;0;-0.707[0;0.577;0. [-0.5;0.5;0 [-0.577;0.5[-0.756;0.3[0.888;-0.3[-0.806;0.4[0.815;-0.3[-0.577;0.5  
 [0;1;0;0] [1;0;0;0] [0.688;0.6(-0.657;0.2[0;0.707;-C [0;0.707;-C [-0.335;-0. [0;0.707;-C [0;0;-1;0]  
 [1;0;0;0] [0;0.789;-C [-0.5;0.5;-C [-0.228;0.4[-0.562;-0. [0;0;0;1] [-0.273;0.1[0.506;0.3[-0.707;0;C  
 [0;0;0.707; [0;0.211;0. [0.162;0.1(-0.429;0.6[0.337;0.5[0.46;0.62(-0.405;0.6[0.282;0.5[0.408;0.8

[-0.54;-0.5 [0.588;0.5(-0.602;-0. [-0.947;-0. [-0.959;-0. [0.787;0.2(-0.838;-0. [0.892;0.2[-0.604;-0.4  
 [-0.457;0.4[0.65;-0.67[0.691;-0.6(-0.233;0.6[0.233;-0.6[0.512;-0.6[0.474;-0.7[0.408;-0.6[0.65;-0.74  
 [-0.54;0.54[0.127;-0.3[-0.372;-0. [-0.177;-0. [0;0.707;-C [0;0.707;-C [-0.152;-0. [0;0.707;-C [0.457;0.5  
 [-0.457;-0. [-0.464;-0. [-0.152;0.1[-0.129;0.1[-0.159;-0. [-0.344;-0. [-0.222;-0. [-0.193;-0. [-0.0661;0.

[0.54;0.54; [0.601;0.6(-0.667;0.6[-0.958;0.6[-0.972;-0. [-0.914;-0. [-0.939;0.6[-0.958;-0. [0.565;0.6  
 [0.457;-0.4[0.602;-0.5[0.632;-0.6[0.0696;0.4[0;0.707;-C [0;0.707;-C [0.0711;0.4[0;0.707;-C [0.76;-0.64  
 [0.54;-0.54[0.42;-0.39[-0.316;0.3[0.249;-0.3[0.205;-0.5[0.31;-0.52[0.275;-0.4[0.236;-0.5[0.122;0.0(-  
 [0.457;0.4[0.317;0.3(-0.234;0.2[0.122;0.4[0.114;0.4[0.263;0.4[0.193;0.3[0.16;0.38[0.297;0.4

[0.408;0.4[0.447;-0.7[-0.316;-0. [1;0;0;0] [1;0;0;0] [-0.632;-0. [0.562;0.3: [0;-0.707;C [0.5;0.25-C  
 [0.707;-0.7[0.707;-0.7[0.707;-0.7[-0.577;0;- [0.277;0.5[0;-0.707;C [-0.577;-0. [-0.815;0.3[-0.378;-0.4  
 [-0.408;-0. [0.447;0.2 [0.0802;-0. [0.773;0.2(-0.493;0.1[0;0.707;0.[-0.264;-0. [-0.282;-0. [0;1;0;0]  
 [-0.707;0.7[0;0.707;-C [-0.639;-0. [0.24;0.62(-0.378;-0. [0;0.707;0.[-0.634;0.5[-0.506;-0. [0.5;0.25+(-

[0.5;0.5;-0 [-0.373033[-0.499999[-0.680089[-0.632455[-4.351097[-0.642968[-0.597295[0.600492:  
 [-0.670820[-0.373033[-0.615644[-0.680089[0.464056[0.752223[-0.642968[4.014029[0.600492:  
 [0.707106[0.663631[0.685994[-0.964816[-0.975417[-0.333653[0.826323[-0.958246[-0.096448  
 [0.316227[0.352787[0.308192[0.311724[-0.308606[-0.288675[0.331926[-0.322491[-0.446042

[-0.316227[-1.957074[-0.5;0.499[0.559417[-0.649578[-0.662306[0.565719[-0.581757[0.227750:  
 [0.707106[0.155963[-0.5;-0.5;-C [0.755063[-6.513308[3.745640[0.599029[-3.659011[0.227750:  
 [0.670820[0.707881[-0.697485[0.961416[0.968962[-0.081553[0.733799[-0.941774[-0.195646  
 [0.5;0.5;0.4[-0.683677[-0.441726[0.161726[0.293230[-0.081553[-0.207973[0.324069[-0.326558

4998 5002 5004 5006 5010 5012 5014 5016 5018  
[-0.378;-0. [0.272-0.2 [0.414;0.5 [0.416;0.6 [0.602;0.2 [-0.577;-0. [-0.577;-0. [-0.577;-0. [-0.577;-0.  
[-0.144+0. [0.272+0.2 [6.18e-17+ [-0.247-0. [0.602;0.2 [0.249+0.4 [0.109+0.5 [0;1;0;0] [-0.417;-0.  
[-0.144-0.4 [0;1;0;0] [6.18e-17- [-0.247+0. [0;1;0;0] [0.249-0.4 [0.109-0.5 [0;-1;0;0] [0;1;0;0]  
[0.417;0.6 [-0.416;-0. [-0.414;-0. [0.406;0.5 [0.298;0.6 [0.307;0.6 [0.314;0.5 [0.258;0.7 [0.313;0.6  
[0.6573;0. [0;-1;0;0] [-0.2621;- [0.4029;0. [0.2897;0. [0.5615;0. [0.7142;0. [0;1;0;0] [0;1;0;0]  
[-0.2214+ [0;1;0;0] [-0.4048-0 [0.1128-0. [0;1;0;0] [-0.5+3.34 [-0.4447;0 [-0.1118;0 [0.1502;-0.  
[-0.2214-0 [0.5;0.5;-0 [-0.4048+ [0.1128+0. [-0.4033;- [-0.5-3.34 [0;0.7071;- [0;-0.7071 [0.3482;0.  
[-0.2866;- [0.5;0.5;-0 [-0.3874;- [0.3239;0. [-0.2678;- [-0.3366;- [-0.239;-0. [0.5008;0. [-0.3214;- [0.  
[-0.5774;- [0;1;0;0] [-0.2621;- [0.3244;0. [0;1;0;0] [-0.7417;- [0.8165;0. [0;1;0;0] [0;1;0;0]  
[0.2815-0. [-0.383-0.1 [0.4048+0. [-0.01648+ [-0.6186;0 [-0.03883- [0.2795-0. [-0.2859;0 [0.5774-1.  
[0.2815+0. [-0.383+0. [0.4048-0. [-0.01648- [-0.6186;0 [-0.03883+ [0.2795+0. [0;0.7071; [0.5774+1.  
[0.2802;0. [-0.431;-0. [-0.3874;- [0.3075;0. [0.1871;0. [0.2213;0. [-0.1885;- [-0.3589;- [0.2535;0.  
[-0.737;0.5 [0.5;-0.5;- [-0.851;0.5 [0.655;-0.5 [-0.577;0.5 [0.888;-0.3 [-0.806;0.4 [-0.577;0; [0.756;0.3  
[0;0;-1;0] [0.653;-0.2 [0;0;-0.851 [0.498;-0.1 [0.657;0.2 [0;0.707;- [0.657;-0.5 [0;0.707;- [0.657;-0.5  
[-0.591;-0. [-0.5;-0.5; [0;0;0.526; [-0.542;-0. [-0.228;0.4 [0;0;0;1] [-0.273;0.1 [-0.228;-0. [-0.562;-0.  
[0.328;0.7 [0.271;0.6 [0.526;0.8 [0.168;0.4 [0.429;0.6 [0.46;0.62 [0.405;0.6 [0.429;0.5 [0.337;0.5  
[0.725;0.3 [0.475;0.5 [-0.524;-0. [0.593;0.4 [-0.624;-0. [0.688;0.3 [-0.782;-0. [0.463;0.6 [-0.442;-0.  
[0.639;-0.6 [0.656;-0.7 [0.288;0.4 [0.684;-0.7 [0.682;-0.7 [0.688;-0.6 [0.577;-0.7 [-0.661;0.7 [0.735;-0.6  
[0.141;0.5 [0.321;0.3 [0.688;-0.7 [-0.278;-0. [-0.368;-0. [0.108;0.4 [-0.187;-0. [0.346;0.2 [-0.439;-0.  
[-0.217;-0. [-0.492;-0. [-0.411;-0. [-0.323;-0. [-0.101;-0. [-0.203;-0. [-0.141;-0. [-0.479;-0. [-0.267;-0.  
[0.828;0.3 [0.383;0.7 [0.524;0.3 [0.623;0.5 [-0.645;-0. [0.846;0.3 [-0.925;-0. [0.395;0.7 [0.286;0.9  
[0.51;-0.78 [-0.797;0.4 [0.288;0.4 [0.479;-0.6 [0.723;-0.6 [0.464;-0.8 [0.339;-0.8 [-0.765;0.4 [0.88;-0.32  
[-0.102;-0. [-0.161;0.2 [0.688;-0.7 [0.537;-0.2 [-0.137;-0. [0.129;0.0 [0.00746;- [-0.232;0.3 [-0.232;0.1  
[0.207;0.5 [0.439;0.2 [0.411;0.4 [0.307;0.3 [0.205;0.2 [0.231;0.4 [0.174;0.3 [0.452;0.2 [0.299;0.2  
[-0.144+0. [0.272+0.2 [-0.414;-0. [-0.247+0. [0;1;0;0] [-0.577;-0. [0.109-0.5 [0;1;0;0] [0;1;0;0]  
[0.417;0.6 [-0.416;-0. [6.18e-17+ [0.416;0.6 [0.602;0.2 [0.249+0.4 [0.314;0.5 [0;-1;0;0] [-0.417;-0.  
[-0.378;-0. [0.272-0.2 [6.18e-17- [-0.247-0. [0.298;0.6 [0.249-0.4 [-0.577;-0. [0.258;0.7 [0.313;0.6  
[-0.144-0.4 [0;1;0;0] [0.414;0.5 [0.406;0.5 [0.602;0.2 [0.307;0.6 [0.109+0.5 [-0.577;-0. [-0.577;-0.  
[-0.417463 [0.352847 [-0.526035 [-0.483609 [-0.649175 [-0.662663 [-0.640118 [0.653092 [-0.617213  
[-0.675759 [0.352847 [-0.089808 [-0.202278 [-0.649175 [-0.210262 [-0.664958 [0.166731 [-0.441898  
[-0.675759 [-0.162937 [-0.089808 [-0.202278 [-0.092362 [-0.210262 [-0.664958 [-0.073957 [0.124015  
[0.452759 [-0.420831 [0.446236 [0.420447 [-0.352065 [0.375282 [-0.360600 [-0.348128 [-0.342079  
[-0.500604 [0.338112 [-0.446236 [0.493896 [-0.686943 [0.660009 [-0.612628 [0.625543 [-0.644848  
[0.143417 [0.338112 [0.089808 [-0.194123 [-0.705607 [0.743722 [-0.359255 [0.053639 [0.388745  
[0.143417 [-0.215041 [0.089808 [-0.194123 [0.151654 [0.743722 [-0.359255 [0.053639 [-0.189486  
[0.538815 [0.509713 [0.526035 [0.577685 [0.289117 [0.337695 [0.378453 [0.210599 [-0.354039

5020 5022 5058 5062 5064 5066 5068 5070 5074  
[-0.532;-0. [-0.512;-0. [-0.0544+C [0;-0.707;C [0;0.707;-C [-0.116+0. [-0.302;-0. [0;-0.707;C [0.198+0.4  
[0.153+0.3 [-0.288-0.2 [-0.0544-0 [0.109+0.5 [0;-0.707;C [-0.116-0.3 [-0.707+3. [-0.707;C [0.198-0.4  
[0.153-0.3 [-0.288+0. [0.707;-0.7 [0.109-0.5 [0;-0.707;- [0.525;-0.6 [-0.707-3.5 [0.707;-0.7 [0.707;-0.7  
[-0.314;-0. [0.31;0.53 [-0.258;-0. [0.314;0.5 [0;0.707;0 [-0.294;-0. [0.302;0.6 [-0.323;-0. [0.215;0.5  
[-0.2805;-C [0.378;0.7 [-0.6395;-C [0.7701;0. [0;-0.7071 [0.3158;0. [-0.3253;-C [-0.5;-0.5;- [-0.7282;-C  
[-0.3343+C [-0.3238;0 [0.5596;-0. [0.5774;-0 [0;-0.7071 [-0.4458;0 [-0.5774;0 [-0.5955;0 [0.3688;-0.  
[-0.3343-0 [0;0.7071;- [-0.2199+C [-0.2028;0 [0;0.7071;- [-0.06806- [-0.573;0.6 [0;0.7071;- [0.3492;0.1  
[-0.3321;-C [-0.2465;-C [-0.2199-0 [0;-0.7071 [0;0.7071;- [-0.06806+ [-0.2461;-C [-0.1993;-C [-0.145;0.1  
[0.5453;0. [-0.5405;-C [-0.6111;-C [-0.7716;-C [0;-0.7071 [-0.1036+C [-0.3253;-C [0.3102;0. [-0.6934;-C  
[0.2479-0. [-0.1885+C [-0.6111;-C [0.3027;-0 [0;-0.7071 [-0.1036-0 [0.5774;-0 [0;0.7071;- [-0.6934;-C  
[0.2479+0. [-0.1885-0 [0.7536;-0. [0.6273;-0 [0;-0.7071 [0.5419;-0 [0.573;-0.6 [0.5;-0.5;-C [0.5774;0;-  
[-0.2754;-C [0.2137;0. [0.1263;0. [-0.1659;-C [0;-0.7071 [-0.259;-0. [-0.2461;-C [0.2383;0. [-0.09701;-  
[-0.806;0.1 [0.815;-0.3 [-0.577;0.5 [0.657;-0.5 [-0.851;0.5 [0.657;-0.5 [0;0;-0.707 [-0.5;0.5;0 [-0.577;0.5  
[-0.335;0.6 [0;0.707;-C [-0.707;0;C [-0.577;0;- [0;0;0.526; [-0.577;0;- [-0.851;0.5 [-0.698;0.2 [0.72;0.16  
[-0.273;-0. [0.506;0.3 [0;0;-1;0] [-0.429;-0. [0;0;-0.851 [-0.429;-0. [0.526;0.8 [-0.507;-0. [0;0.577;-C  
[0.405;0.5 [0.282;0.5 [0.408;0.8 [-0.228;-0. [0.526;0.8 [-0.228;-0. [0;0;0.707; [0.0795;0. [0.385;0.5  
[0.574;0.4 [-0.615;-0. [-0.69;-0.3 [0.79;0.30 [0.557;0.4 [0.589;0.4 [0.605;0.4 [0.673;0.4 [-0.785;-0.  
[0.698;-0.7 [0.692;-0.7 [0.64;-0.66 [0.585;-0.6 [0.435;-0.5 [0.644;-0.7 [0.569;-0.3 [0.676;-0.6 [0.549;-0.7  
[-0.294;-0. [0.304;0.4 [-0.325;-0. [-0.101;0.0 [-0.53;0.4 [0.244;-0.1 [0.47;-0.55 [-0.0472;0 [-0.285;-0.  
[-0.311;-0. [-0.224;-0. [0.094;0.4 [-0.152;-0. [-0.468;-0. [0.423;0.4 [-0.299;-0. [-0.297;-0. [-0.0219;0.  
[0.652;0.5 [0.676;0.6 [0.853;0.2 [0.906;0.2 [0.557;0.4 [0.644;0.5 [-0.605;-0. [0.774;0.4 [0.941;0.1  
[0.6;-0.385 [0.697;-0.7 [0.368;-0.8 [0.378;-0.7 [0.435;-0.5 [0.564;-0.6 [0.569;-0.3 [0.51;-0.63 [0.196;-0.9  
[-0.335;0.6 [0.0238;-0 [0.334;0.1 [-0.133;-0. [0.53;-0.46 [0.398;-0.2 [0.47;-0.55 [0.28;-0.42 [0.239;-0.0  
[0.321;0.3 [0.239;0.2 [0.158;0.5 [0.139;0.6 [0.468;0.5 [0.329;0.4 [0.299;0.6 [0.249;0.4 [0.14;0.36;  
[-0.314;-0. [-0.512;-0. [-0.258;-0. [0.109+0.5 [0;-0.707;C [-0.116-0.3 [-0.302;-0. [-0.323;-0. [0.198+0.4  
[-0.532;-0. [-0.288-0.2 [-0.0544+C [0.109-0.5 [0;0.707;-C [0.525;-0.6 [0.302;0.6 [0;0.707;-C [0.198-0.4  
[0.153+0.3 [-0.288+0. [-0.0544-0 [0.314;0.5 [0;-0.707;- [-0.294;-0. [-0.707+3. [-0.707;C [0.707;-0.7  
[0.153-0.3 [0.31;0.53 [0.707;-0.7 [0;-0.707;C [0;0.707;0 [-0.116+0. [-0.707-3.5 [0.707;-0.7 [0.215;0.5  
[0.653728 [-0.593522 [-0.551358 [0.059553 [0.144337 [-0.147348 [-0.338214 [0.116466 [0.485082  
[0.090423 [-0.206956 [-0.551358 [0.685690 [0.144337 [-0.147348 [-0.732072 [0.116466 [0.485082  
[0.090423 [-0.206956 [0.764291 [0.685690 [0.381332 [0.662811 [-0.785394 [-0.753619 [0.777110  
[0.365152 [-0.345841 [0.297315 [-0.317342 [-0.257145 [0.323655 [-0.316274 [0.323900 [-0.273894  
[0.572037 [-0.579318 [-0.300964 [0.122738 [-0.257145 [0.140618 [0.316274 [-0.288675 [-0.577350  
[0.307739 [-0.226701 [-0.300964 [0.714567 [-0.381332 [0.140618 [0.785394 [-0.288675 [0.757188  
[0.307739 [-0.226701 [0.777477 [0.714567 [0.144337 [0.161850 [0.732072 [-0.759068 [0.788275  
[-0.382669 [0.407535 [0.208828 [-0.377865 [0.144337 [-0.234753 [0.338214 [-0.437927 [0.172714

5076 5078 5080 5082 5084 5086 6342 6348 6350  
[0.371;0.6 [0;-0.707;C [0;0.707-3 [-0.422-0.1[0.429;0.5 [0.345;0.6 [-0.3;0.632 [-0.389+0. [-0.447;0.7  
[0.638;-0.2[0.392+0.4 [0;0.707+3 [-0.422+0. [-0.657;0.5 [0;0.707;-C [-0.19-0.47 [-0.389-0.3 [0.5;-0.25-  
[0.638;-0.2[0.392-0.4 [0;-0.707+ [-0.468;0.7 [0.707;-0.7 [-0.707;0.7 [-0.19+0.4 [0;0;1;0] [0.5;-0.25+  
[0.207;0.6 [0.248;0.5 [0;-0.707-3 [0.234;0.5 [0.228;0.5 [-0.253;-0. [-0.448;-0. [-0.444;-0. [0.447;0.2  
[0.7534;0. [-0.8438;-C [0;0.8507; [0.2859;0. [-0.3825;-C [0.5251;0. [-0.4484;-C [0;0;1;0] [-0.3162;-C  
[-0.6252;0 [0.5114;-0 [0;0.8507; [-0.3589;0 [0.5148;-0 [-0.5277;0 [-0.1905+C [0;0;1;0] [-0.7071-6  
[-0.2999;-C [-0.1956;-C [0;0.5257;- [0.3589;0. [-0.2651;0 [0.08074;0 [-0.1905-0 [-0.7071;0 [-0.7071+6  
[0.1905;0. [-0.2101;-C [0;-0.5257; [-0.2859;-C [-0.2993;-C [-0.2399;-C [-0.3001;0 [0.7071;-0 [0.7071;-0  
[-0.8377;-C [0.9014;0. [0;0.8507;- [0.05169-C [0.6248;0. [-0.7224;-C [-0.3001;0 [0;0;1;0] [-0.2209;0.  
[-0.1301+C [0.3819;-0 [0;0.8507;- [0.05169+ [-0.4797;0 [0.2484;-0 [-0.1905-0 [-0.3461-0 [0.2887-0.  
[-0.1301-0 [-0.3933;0 [0;0.5257; [0.3868;-0 [0.378;-0.7 [0.3429;-0 [-0.1905+C [-0.3461+C [0.2887+0.  
[0.1035;0. [0.1255;0. [0;-0.5257; [0.162;0.3 [0.1823;0. [-0.1681;-C [-0.4484;-C [-0.66;-0.3 [0.5334;0.  
[-0.768;0.2 [-0.768;0.4 [-0.768;0.2 [-0.768;0.4 [-0.577;0;C [-0.756;0.3 [0;0.737;-C [0;0;0.707; [0;0.591;-C  
[-0.423;0.5 [0.423;0.6 [-0.423;0.5 [0.423;0.6 [0.645;-0.6 [-0.218;0.6 [1;0;0;0] [0;0.929;-C [0;0.737;0.  
[-0.312;-0. [0.366;-0.2 [-0.312;-0. [0.366;-0.2 [-0.423;-0. [0.577;0.5 [0;-0.591;- [1;0;0;0] [1;0;0;0]  
[0.366;0.4 [0.312;0.5 [0.366;0.4 [0.312;0.5 [0.267;0.3 [0.218;0.3 [0;0.328;0. [0;0.369;0. [0;0.328;0.  
[0.794;0.3 [-0.86;-0.2 [0.594;0.4 [-0.618;-0. [0.669;0.4 [-0.724;-0. [-0.563;-0. [0.482;0.5 [-0.534;-0.  
[0.581;-0.5 [0.482;-0.6 [0.644;-0.7 [0.673;-0.7 [0.683;-0.6 [0.639;-0.6 [0.311;-0.6 [0.216;0.1 [-0.0449;0.  
[-0.114;-0. [-0.147;-0. [0.239;-0.1 [-0.378;-0. [-0.0502;0 [-0.153;-0. [0.373;-0.5 [0.203;-0.8 [-0.489;0.4  
[-0.138;-0. [-0.0879;-C [0.417;0.4 [-0.15;0.07 [-0.289;-0. [-0.21;-0.1 [0.669;0.1 [-0.824;0.1 [-0.688;0.C  
[-0.895;-0. [0.958;0.1 [0.639;0.5 [0.681;0.6 [0.777;0.4 [0.879;0.3 [0.238;-0.6 [0.21;0.48 [0.0987;-0.  
[0.402;-0.7 [0.227;-0.8 [0.561;-0.6 [0.62;-0.68 [0.497;-0.6 [0.384;-0.8 [0.652;-0.4 [0.38;0.08 [-0.619;-0.  
[0.118;-0.C [-0.116;-0. [0.403;-0.3 [0.31;-0.22 [0.286;-0.4 [0.197;-0.2 [-0.57;-0.3 [0.535;-0.7 [0.515;-0.5  
[0.154;0.6 [0.131;0.4 [0.338;0.4 [0.237;0.3 [0.258;0.4 [0.201;0.3 [0.44;0.48; [0.725;0.3 [0.584;0.3  
[0.371;0.6 [0.392+0.4 [0;0.707-3 [0.234;0.5 [0.228;0.5 [-0.707;0.7 [-0.448;-0. [-0.444;-0. [0.447;0.2  
[0.638;-0.2[0.392-0.4 [0;0.707+3 [-0.468;0.7 [0.429;0.5 [0;0.707;-C [-0.19-0.47 [-0.389+0. [0.5;-0.25-  
[0.638;-0.2 [0;-0.707;C [0;-0.707+ [-0.422+0. [0.707;-0.7 [0.345;0.6 [-0.19+0.4 [-0.389-0.3 [0.5;-0.25+  
[0.207;0.6 [0.248;0.5 [0;-0.707-3 [-0.422-0.1 [-0.657;0.5 [-0.253;-0. [-0.3;0.632 [0;0;1;0] [-0.447;0.7  
[-0.456802 [-0.025542 [0.160065 [0.510680 [0.579381 [-0.471404 [-0.267948 [-0.209707 [-0.410592  
[-0.715846 [-0.688156 [0.160065 [0.510680 [-0.677705 [-0.406281 [0.134510 [-0.209707 [-0.575873  
[-0.715846 [-0.688156 [0.318907 [-0.561144 [-0.765274 [0.770674 [0.134510 [0.163907 [-0.575873  
[-0.265683 [-0.277965 [0.251131 [0.282525 [0.278322 [0.279967 [0.347078 [0.275819 [0.334111  
[-0.438432 [-0.533568 [0.313690 [-0.601634 [-0.465727 [0.537346 [-0.229271 [0.377964 [-0.331489  
[0.848171 [-0.533568 [-0.482388 [-0.601634 [-0.753952 [-1.146663 [-0.229271 [-0.375086 [-0.331489  
[0.848171 [-0.961307 [0.096434 [-0.149562 [-0.745701 [0.762000 [-0.380340 [-0.329292 [-0.350725  
[-0.161763 [-0.276456 [0.096434 [0.177617 [-0.177485 [-0.307464 [-0.554656 [0.547454 [-0.602302

6356 6358 6364 6366 6550 6552 6554 6558 6598  
[-0.289+0. [-0.354;0.5 [-0.407+0. [-0.5;0.5;-C [0.5+0.333 [-0.707;0;C [-0.707;0;C [0.707;0;0; [-0.369+0.1  
[-0.289-0.5 [0.289+0.5 [-0.407-0.3 [-0.287+0.4 [0.5-0.333 [0;1;0;0] [-0.683;0.4 [-0.707;0;C [-0.369-0.2  
[0;0;1;0] [0.289-0.5 [0;0;1;0] [-0.287-0.4 [0;-0.707;C [0;0;1;0] [0;1;0;0] [0;-0.707;C [-0.371;0.6  
[-0.289;-0. [-0.354;-0. [-0.338;-0. [-0.352;-0. [0.333;0.5; [0.316;0.6; [0.336;0.5; [0.324;0.4; [-0.339;-0.  
[-0.2887;-C [0.4436;0.4 [-0.1371;-C [0.2953;0.4 [-0.3288;-C [0;1;0;0] [0;1;0;0] [0.1989;0.1 [-0.4014;-C  
[0;0;1;0] [-0.379+0.4 [0;0;1;0] [0.7071;-0 [0;-0.7071 [0;0;1;0] [0.09058;- [0;-0.7071 [0;0.7071;-  
[-0.2887-0 [-0.379-0.4 [-0.7071;0 [-0.7071;0 [0.7288;-0 [0.3162;-0 [0.6667;-0 [0.7163;-0 [-0.3475-0  
[-0.2887+C [0.3634;-0 [0.7484;-0 [-0.4695;0 [-0.3565;-C [0.7071;0; [-0.4932;-C [-0.3378;-C [-0.3475+C  
[-0.2887-0 [-0.109+0.1 [0.05977-C [0;0.7071;- [0.1571+0. [0;1;0;0] [0;1;0;0] [0.5+1.179 [0.3639-0.1  
[-0.2887+C [-0.109-0.5 [0.05977+ [0.2135+0. [0.1571-0. [0;0;1;0] [-0.5774;0 [0.5-1.179 [0.3639+0.  
[0;0;1;0] [0;0.7071;- [0;0;1;0] [0.2135-0. [0;0.7071;- [-0.7071;0 [-0.5774;0 [0.334;-0.1 [-0.5774;0.  
[-0.2887;-C [-0.2627;-C [-0.4931;-C [0.3385;0.1 [-0.276;-0. [0.5883;0.1 [0.3904;0.1 [0.2887;0.1 [-0.2627;-C  
[-0.5;-0.5;C [-0.582;-0. [-0.577;0;C [-0.691;-0. [0;0.707;-C [-0.632;0.3 [0;0.707;-C [0;0.707;-C [0.657;-0.5  
[0.0674;0.1 [0.707;-0.7 [0.239;0.8 [-0.207;0.8 [0.929;-0.2 [0;0.707;-C [0.823;-0.3 [0.878;-0.2 [0.577;0;-C  
[0.814;-0.4 [-0.299;-0. [-0.76;0.35 [0.676;-0.1 [0;0;0;1] [-0.707;0;C [0.484;0.1 [0.395;0.2 [-0.429;-0.  
[0.289;0.2 [0.268;0.2 [0.178;0.3 [0.15;0.29 [0.369;0.6 [0.316;0.6 [0.298;0.6 [0.269;0.5 [0.228;0.5  
[-0.541;-0. [0.608;0.5 [0.528;0.5 [0.553;0.6 [0.593;0.4 [-0.479;-0. [-0.468;-0. [0.542;0.5 [0.601;0.4  
[-0.707;0.7 [0.607;-0.7 [-0.134;0.7 [0.387;-0.7 [0;0.707;-C [0;0.707;-C [-0.227;0.6 [0;0.707;-C [0.642;-0.0  
[-0.408;-0. [-0.504;-0. [0.456;-0.3 [0.625;-0.0 [0.794;-0.4 [0.52;-0.47 [0.745;-0.3 [0.793;-0.4 [0.466;-0.5  
[0.202;0.2 [-0.0838;-C [-0.704;0.0 [-0.393;0.0 [-0.13;-0.3 [-0.707;0;C [-0.418;-0. [-0.28;-0.2 [-0.102;-0.  
[-0.347;-0. [0.718;-0.6 [0.0829;-0. [0.359;-0.8 [-0.589;0.5 [0.297;-0.6 [0.278;-0.9 [-0.315;0.6 [-0.751;-0.  
[0.478;-0.8 [-0.461;-0. [-0.109;-0. [-0.209;-0. [0;0.707;-C [0;0.707;-C [-0.0441;-C [0;0.707;-C [0.577;-0.5  
[0.662;0.0 [0.434;0.6 [0.801;-0.2 [0.813;0.1 [0.761;0.2 [0.707;0;0; [0.84;0.16; [-0.884;-0. [0.115;0.4  
[0.461;0.4 [0.289;0.2 [0.583;0.3 [0.408;0.2 [0.273;0.3 [0.642;0.2 [0.465;0.2 [0.346;0.2 [0.298;0.6  
[-0.289-0.5 [-0.354;-0. [0;0;1;0] [-0.287+0.4 [0.5-0.333 [-0.707;0;C [0;1;0;0] [0;-0.707;C [-0.369-0.2  
[-0.289;-0. [0.289+0.5 [-0.407+0. [-0.287-0.4 [0.333;0.5; [0;1;0;0] [-0.683;0.4 [0.324;0.4; [-0.339;-0.  
[0;0;1;0] [0.289-0.5 [-0.407-0.3 [-0.5;0.5;-C [0;-0.707;C [0;0;1;0] [0.336;0.5; [-0.707;0;C [-0.369+0.1  
[-0.289+0.1 [-0.354;0.5 [-0.338;-0. [-0.352;-0. [0.5+0.333 [0.316;0.6; [-0.707;0;C [0.707;0;0; [-0.371;0.6  
[-0.288675 [-0.321992 [-0.352700 [-0.500000 [0.615939 [0.707106 [0.801176 [-0.802610 [-0.375101  
[-0.288675 [-0.620127 [-0.352700 [-0.309778 [0.615939 [-0.075101 [0.743016 [-0.802610 [0.405817  
[0.229415 [-0.620127 [0.122576 [-0.309778 [0;-0.7071 [-0.075101 [0.213808 [-4.408417 [0.405817  
[-0.288675 [0.338461 [-0.299164 [-0.316998 [-0.362488 [-0.316227 [0.329082 [0.334940 [0.320881  
[-0.288675 [-0.608651 [-0.495531 [-0.588642 [-0.561920 [-0.707106 [0.679919 [-0.602005 [-0.398814  
[-0.288675 [-0.628463 [-0.495531 [-0.291419 [-0.928671 [-0.316227 [-0.242927 [-0.556702 [-0.398814  
[-0.288675 [-0.628463 [0.365636 [-0.291419 [0;-0.7071 [-0.279347 [-0.314389 [-3.102726 [-0.518380  
[-0.377964 [0.496358 [0.413613 [-0.525797 [0.421959 [0.294862 [0.439447 [-0.445895 [0.429926





| 6858        | 6862        | 6870        | 6874        | 6876        | 6878        | 7126        | 7128        | 7130        |
|-------------|-------------|-------------|-------------|-------------|-------------|-------------|-------------|-------------|
| [-0.577;0.5 | [0;-0.707;C | [0;-0.707;C | [-0.365;0.5 | [-0.241+0.  | [0;0.707;-C | [0;-0.707;C | [-0.0544;-C | [-0.707;0;C |
| [-0.683;0.4 | [0.648;-0.3 | [-0.289-0.5 | [-0.705;0.2 | [-0.241-0.4 | [0.619;-0.1 | [0.664;-0.C | [0.707;0;0; | [-0.707;0;C |
| [-0.577;0.5 | [0.648;-0.3 | [-0.289+0.  | [0.577;-0.5 | [-0.577;0.5 | [0.619;-0.1 | [0.664;-0.C | [0;0.707;0  | [0.577;-0.5 |
| [0.336;0.5  | [-0.372;-0. | [-0.275;-0. | [-0.263;-0. | [0.247;0.5  | [0.284;0.4  | [-0.227;-0. | [0;0.707;0  | [-0.209;-0. |
| [0.2843;0.  | [-0.3721;-C | [0.5;0.5;0. | [0.1944;0.  | [-0.2474;-C | [-0.3361;-C | [0.5318;0.  | [0;-0.7071  | [0.2209;0.  |
| [0.378;-0.7 | [0.6478;-0  | [-0.4274+C  | [0.3538;-0  | [0.5774;-0  | [0.6826;-0  | [0.6325;-0  | [0;-0.7071  | [0.4082;-0. |
| [0.6186;-0  | [0.6478;-0  | [-0.4274-0  | [-0.7318;0  | [-0.2412-0  | [0.5774;0;  | [-0.3091;-C | [-0.7071;0  | [0.5334;0.  |
| [0.6186;-0  | [0;-0.7071  | [0.06649;-  | [-0.2926;0  | [-0.2412+C  | [-0.2357;0  | [0;-0.7071  | [0.101;-0.€ | [-0.4082;0  |
| [-0.3606;0  | [0;-0.7071  | [0.6407;-0  | [-0.2027;0  | [-0.2412+C  | [-0.08141+  | [-0.6816;0  | [0.05351;-  | [0.683;-0.5 |
| [-0.5774;0  | [-0.6478;0  | [0.6407;-0  | [-0.6755;-C | [-0.2412-0  | [-0.08141-  | [-0.6816;0  | [0.7071;0;  | [-0.7071+2  |
| [-0.5821;0  | [-0.6478;0  | [0.3422;0.  | [-0.7071;0  | [-0.5774;0  | [0.7071;0;  | [0;0.7071;  | [0;0.7071+  | [-0.7071-2  |
| [-0.3687;-C | [-0.3721;-C | [0.1471;0.  | [-0.2064;-C | [0.2474;0.  | [0.2303;0.  | [-0.1311;-C | [0;0.7071-  | [-0.183;-0. |
| [0;0.707;0  | [0;0.5;0.5; | [0.842;0.1  | [0;0.707;0  | [-0.577;0;C | [-0.534;0.3 | [-0.871;0.2 | [-0.653;0.2 | [-0.577;0.5 |
| [1;0;0;0]   | [0;0.707;-C | [0;-0.707;C | [0.875;0.1  | [-0.577;-0. | [0.625;0.6  | [0;0.707;-C | [-0.367;0.€ | [0.657;0.4  |
| [0;0.325;-C | [1;0;0;0]   | [0.5;-0.5;0 | [-0.462;0.4 | [0.553;-0.7 | [-0.558;0.4 | [-0.416;-0. | [0.604;0.3  | [-0.429;0.2 |
| [0;0.628;0  | [0;0.5;0.5; | [0.204;0.4  | [0.147;0.5  | [0.167;0.3  | [0.114;0.4  | [0.261;0.6  | [0.271;0.6  | [0.228;0.6  |
| [-0.537;-0. | [-0.583;-0. | [-0.655;-0. | [-0.551;-0. | [-0.572;-0. | [0.611;0.5  | [-0.721;-0. | [0.574;0.4  | [-0.609;-0. |
| [0.129;-0.7 | [0.428;-0.5 | [0.751;-0.4 | [0.295;-0.7 | [-0.423;0.5 | [0.603;-0.7 | [0.687;-0.4 | [0.413;-0.5 | [0.61;-0.73 |
| [-0.489;-0. | [0;0.707;-C | [0.0793;0.  | [-0.766;0.C | [0.502;-0.5 | [-0.453;-0. | [0;-0.707;C | [0.247;0.6  | [-0.455;-0. |
| [-0.675;0.4 | [0.691;-0.C | [-0.0319;0  | [-0.15;0.3C | [0.492;0.4  | [-0.242;0.2 | [-0.0872;-C | [0.662;-0.2 | [0.222;-0.1 |
| [-0.352;0.€ | [0;0.707;-C | [0.902;-0.1 | [0.37;-0.72 | [0.492;0.5  | [0.569;-0.5 | [0.977;-0.C | [0.427;0.5  | [-0.602;0.5 |
| [0.357;0.5  | [-0.691;-0. | [0.339;0.5  | [-0.518;-0. | [-0.504;0.4 | [-0.624;-0. | [0;0.707;-C | [-0.564;0.4 | [-0.585;-0. |
| [0.682;-0.3 | [0.583;-0.4 | [0.18;-0.65 | [0.678;-0.2 | [0.553;-0.5 | [0.428;-0.4 | [-0.121;0.4 | [0.547;-0.4 | [0.433;-0.3 |
| [0.533;0.4  | [0.428;0.5  | [0.197;0.4  | [0.368;0.3  | [0.446;0.4  | [0.321;0.3  | [0.177;0.5  | [0.448;0.5  | [0.329;0.4  |
| [-0.577;0.5 | [-0.372;-0. | [0;-0.707;C | [-0.705;0.2 | [0.247;0.5  | [0.284;0.4  | [-0.227;-0. | [0;0.707;0  | [-0.209;-0. |
| [-0.577;0.5 | [0.648;-0.3 | [-0.289-0.5 | [-0.365;0.5 | [-0.577;0.5 | [0.619;-0.1 | [0.664;-0.C | [0;0.707;0  | [0.577;-0.5 |
| [-0.683;0.4 | [0.648;-0.3 | [-0.289+0.  | [0.577;-0.5 | [-0.241+0.  | [0.619;-0.1 | [0.664;-0.C | [0.707;0;0; | [-0.707;0;C |
| [0.336;0.5  | [0;-0.707;C | [-0.275;-0. | [-0.263;-0. | [-0.241-0.4 | [0;0.707;-C | [0;-0.707;C | [-0.0544;-C | [-0.707;0;C |
| [0.657412   | [2.346941   | [-0.065633  | [-0.37652C  | [-0.229775  | [-0.122477  | [-7.712437  | [0.707106   | [0.673001   |
| [0.657412   | [-0.72605€  | [-0.629283  | [-0.831823  | [-0.229775  | [-0.685668  | [0.706459   | [0.106438   | [0.673001   |
| [0.748812   | [-0.72605€  | [-0.629283  | [0.752910   | [-0.78726€  | [-0.685668  | [0.706459   | [0.401543   | [0.790981   |
| [0.207346   | [0.252915   | [-0.245643  | [0.234624   | [-0.23179€  | [0.251434   | [0.234234   | [0.196882   | [0.227228   |
| [-0.432512  | [0;-0.7071  | [-0.180183  | [0.364544   | [-0.275414  | [0.323883   | [7.295751   | [0.707106   | [0.599392   |
| [-0.447213  | [-0.483105  | [-0.600151  | [-0.529591  | [-0.275414  | [0.561970   | [0.826839   | [-0.062554  | [0.751458   |
| [-0.08834C  | [-0.483105  | [-0.600151  | [0.096836   | [-0.12123C  | [0.561970   | [0.826839   | [0.204124   | [-0.159111  |
| [0.447213   | [-0.546885  | [0.365680   | [-0.351083  | [-0.265231  | [0.413813   | [-0.286882  | [0.204124   | [-0.217413  |

7134 13140 13150 13150 13150 13260 13260 13280 14680  
[-0.671;0.2[-0.632;-0. [0.378;0.3 [0.378;0.3 [0.347;0.3 [0.5;0.5;-0 [0.523;0.5 [0.557;0.5 [-0.378;-0.  
[-0.5;-0.5;C [0.221;0.2 [-0.614;-0. [0.378;0.3 [0;0;0.707; [0;0;0.707; [0.197;0.1 [0;0;-0.707 [0.667;2.2:  
[-0.813;0.3 [1;0;0;0] [-0.5;0.5;0 [-0.5;0.5;0 [-0.756;0.3 [0.707;-0.7 [0.707;-0.7 [0.707;-0.7 [0.667;2.2:  
[0.233;0.5 [0.5;0.5;0. [-0.5;-0.5;- [-0.5;-0.5;- [-0.461;-0. [-0.5;-0.5;- [0.47;0.47; [-0.435;-0. [-0.5;-0.5;-  
  
[0.3354;0. [-1;0;0;0] [0.6325;0. [-0.7559;-C [0.8116;0. [-0.5;0.5;0. [-0.5318;0. [-0.5573;-C [0.7035;0. [-  
[0.5911;-0. [0.8629;-0. [-0.6708;0. [-0.7413;0 [-0.809;0.5 [0;0;-0.707 [-0.7071;0 [0.7071;-0 [-0.6238;-C  
[0;-0.7071; [0.2811;0. [-0.5;0.5;-0 [0;0;-0.707 [0.309;0.5; [0.7071;-0. [0.3091;0. [-0.4352;0. [-0.6238;-C  
[-0.3203;-C [0;0;-0.707 [0;0;0.707; [-0.2034;-C [0.1297;0. [-0.5;-0.5;C [-0.4082;-C [0;0;0.707; [-0.2109;-C  
  
[-0.6794;-C [1;0;0;0] [-0.6808;-C [-0.8468;-C [0.9051;0. [-0.5;0.5;-0 [0.5804;0. [-0.6325;0. [-0.3433+C  
[0.8165;-0. [0.4563;-0. [-0.5;0.5;-C [0.8165;0. [-0.6087;-0 [0;0;-0.707 [0.7071;-0. [0.7071;-0 [-0.3433-0  
[0.683;-0.5 [0;0;-0.707 [0;0;0.707; [0;-0.5774 [0.06415;0 [0.7071;-0. [0.1527;0. [-0.4578;-C  
[0.183;0.5; [0.2565;0. [-0.3462;0. [-0.3409;-C [-0.2764;-C [0.5;0.5;0. [-0.4035;0. [-0.3162;0. [-0.3457;0.4  
  
[-0.742;0.3 [0.707;-0.7 [0.707;-0.7 [0.707;-0.7 [0.707;-0.7 [-0.707;0.7 [0.707;-0.7 [0.707;-0.7 [0.435;-0.5  
[0;0.707;-C [0;0;-0.707 [-0.372;-0. [-0.227;-0. [-0.24;-0.2 [0;0;-0.707 [-0.171;-0. [0;0;0.707; [0.707;0;-C  
[-0.645;-0. [-0.435;-0. [0;0;0.707; [-0.29;-0.2 [0.408;0.4 [0;0;0.707; [-0.518;-0. [-0.557;-0. [0;-0.707;C  
[0.186;0.5 [0.557;0.5 [0.602;0.6 [0.604;0.6 [0.525;0.5 [0.707;0.7 [0.45;0.45; [0.435;0.4 [0.557;0.4:  
  
[0.656;0.4 [-0.804;-0. [-0.543;-0. [0.596;0.4 [-0.654;-0. [0.5;0.5;0. [-0.531;0.5 [-0.557;-0. [0.587;0.4:  
[0.715;-0.4 [0.553;-0.6 [0.703;-0.7 [0.737;-0.5 [0.693;-0.6 [0;0;-0.707 [0.707;-0.7 [0.707;-0.7 [0.802;-0.4  
[0;0.707;-C [-0.218;-0. [-0.453;-0. [0.0412;0. [-0.248;-0. [0.707;-0.7 [0.00772;0 [-0.435;-0. [0.0931;0. [-  
[-0.242;-0. [0;0;-0.707 [-0.0745;0. [-0.316;-0. [-0.176;-0. [-0.5;-0.5;C [-0.466;-0. [0;0;0.707; [-0.0696;-C  
  
[-0.932;-0. [0.94;0.16 [-0.637;-0. [0.712;0.4 [0.852;0.3 [0.5;0.5;-0 [0.582;0.5 [-0.632;-0. [0.917;-0.1  
[0;0.707;-C [0.276;-0.8 [0.671;-0.6 [0.612;-0.6 [0.449;-0.8 [0;0;-0.707 [0.707;-0.7 [0.707;-0.7 [0.28;0.31!  
[0.248;-0.5 [0;0;0.707; [-0.224;0.2 [0.176;-0.4 [0.0984;-0 [0.707;-0.7 [0.00867;0 [0;0;0.707; [0.0589;-0.  
[0.264;0.4 [0.202;0.4 [0.306;0.3 [0.296;0.4 [0.251;0.3 [0.5;0.5;0. [-0.401;0.4 [0.316;0.3 [0.278;0.4:  
  
[-0.813;0.3 [1;0;0;0] [0.378;0.3 [0.378;0.3 [-0.756;0.3 [0.5;0.5;-0 [0.47;0.47; [0.557;0.5 [-0.378;-0.  
[0.233;0.5 [0.5;0.5;0. [-0.5;0.5;0 [-0.5;-0.5;- [0;0;0.707; [0;0;0.707; [0.523;0.5 [0;0;-0.707 [0.667;2.2:  
[-0.671;0.2 [-0.632;-0. [-0.5;-0.5;- [0.378;0.3 [-0.461;-0. [0.707;-0.7 [0.707;-0.7 [0.707;-0.7 [-0.5;-0.5;-  
[-0.5;-0.5;C [0.221;0.2 [-0.614;-0. [-0.5;0.5;0 [0.347;0.3 [-0.5;-0.5;- [0.197;0.1 [-0.435;-0. [0.667;2.2:  
  
[-2.511034 [-5.597135 [9.420554 [-0.369949 [2.706119 [0.5;0.5;-0 [-0.456490 [-2.455237 [-0.355542  
[-0.753750 [0.617003 [-0.624136 [-0.369949 [-0.110509 [-0.705821 [-0.456490 [0.597911 [0.687534  
[-0.908837 [-0.964763 [0.5;-0.5;-C [0.5;-0.5;-C [-0.835918 [-0.042621 [-0.707106 [-0.707106 [0.687534  
[-0.235385 [-0.527380 [0.556882 [-0.532339 [-0.505381 [0.5;0.5;0. [-0.489645 [-0.468296 [-0.543066  
  
[-0.677776 [0.685994 [4.592051 [-0.553498 [0.415053 [0.5;0.5;-0 [0.560504 [0.615917 [0.489050  
[-4.138559 [-0.586262 [0.701646 [-0.236277 [-0.317971 [0.042621 [0.262703 [7.226237 [0.805250  
[-0.666589 [0.919145 [-0.649933 [-0.717317 [0.918895 [-0.705821 [-0.707106 [0.707106 [0.805250  
[-0.318758 [0.5;0.5;0. [-0.5;-0.5;- [-0.5;-0.5;- [-0.490577 [-0.5;-0.5;- [-0.502000 [-0.484277 [-0.5;-0.5;-

14690 14790 14800 14810 14810 14810 15260 15260 15310  
[-0.347;-0. [-0.5;-6.25 [0.616;-0.2[-0.707;0;C [-0.707;0;C [-0.707;0;C [-0.816;0;C [-0.707;0;C [-0.707;0;C  
[-0.289-0.5[-0.5;-6.25 [0.616;-0.2[-0.217+0. [0.702;-0.4[0.715;-0.3[0.226;0;-C [-0.518;0;- [-0.707;0;C  
[-0.289+0. [-0.5;0.5;-C [0.606;-0.6[-0.217-0.2[0.702;-0.4[0.715;-0.3[0;1;0;0] [0.408;-0.5[-0.408;0.5  
[-0.461;-0. [-0.5;-0.5;- [0.463;0.4[-0.477;-0. [0.491;0.4[0.449;0.4[0.436;0.6[-0.408;-0. [-0.408;-0.  
[-0.5251;-C [-0.5;-0.5;- [-0.3893;-C [-0.2832;-C [0.4024;0. [0.4044;0. [0;-1;0;0] [-0.3162;-C [0.4082;0. [0.5774;-0. [-0.5;0.5;-C [0.7071;-0. [-0.4082;0 [0.5952;-0 [0.7071;-0. [0;1;0;0] [-0.3162;0 [-0.4082;0.  
[0.5774;-0. [-1.388e-1 [-0.7071;0 [0.425;-0.3[0.7071;-0 [0.7994;-0 [0.8165;0;- [-0.7071;0 [0.7071;0;-  
[0.2399;0. [-1.388e-1 [0.8446;-0. [-0.7071;0 [0.7071;0; [-0.3877;-C [0.2933;0;- [-0.3162;-C [-0.7071;0.  
[-0.5774;0 [4.441e-16 [0.4133+1. [0.147+0.1 [0.6374;-0 [-0.09593- [0;1;0;0] [0;-0.5774 [-0.7071;0.  
[-0.5774;0 [4.441e-16 [0.4133-1. [0.147-0.1 [0.6374;-0 [-0.09593+ [-0.8165;0 [-0.4117;-C [-0.7071;0.  
[-0.4614;-C [-0.5;0.5;-C [-0.5257;0 [0.7071;0; [-0.7071;0 [-0.6017;0 [-0.4082;0 [0.4082;0. [-0.4082;0.  
[-0.347;-0. [-0.5;-0.5;- [-0.5257;-C [-0.5299;-C [0.5648;0. [-0.4284;-C [0.5298;0. [-0.4082;-C [-0.4082;-C  
[0.789;-0.2[-0.5;0.5;-C [0.423;-0.3[0.103;-0.8[0.193;0.3 [0.191;-0.6 [-0.378;0.7 [0.442;-0.7 [0.602;-0.3  
[-0.211;0.7 [0.707;0;-C [0.366;-0.7 [-0.707;0;C [0.481;-0.7 [0.855;-0.2 [0.752;0;-C [0.707;0;-C [0.372;-0.6  
[0.347;0.3 [0;0.707;0; [0.768;0.3 [-0.575;0.2 [-0.807;-0. [-0.341;-0. [0.319;0;0 [0.36;0.18 [-0.602;-0.  
[0.461;0.4 [-0.5;-0.5;- [0.312;0.4 [0.399;0.5 [0.283;0.5 [0.341;0.4 [0.436;0.6 [0.418;0.6 [0.372;0.6  
[0.525;0.5 [0.5;0.5;0. [0.492;0.5 [-0.46;-0.6 [-0.497;-0. [-0.516;-0. [0.461;0.6 [0.514;0.5 [-0.53;-0.4  
[-0.211;0.7 [-0.5;0.5;-C [0.179;-0.6 [-0.35;0.75 [0.191;-0.6 [0.403;-0.7 [0.347;-0.7 [0.391;-0.8 [-0.479;0.5  
[0.789;-0.2 [-0.433;-0. [-0.518;0.5 [-0.707;0;C [-0.484;0.5 [0.701;-0.0 [0.0607;0; [0.707;0;-C [0.468;-0.5  
[-0.24;-0.2 [0.559;-0.4 [-0.676;-0. [-0.407;0.0 [0.694;0.1 [0.283;0.2 [-0.814;0;C [-0.287;-0. [-0.52;-0.4  
[0.789;-0.2 [-0.43;-0.5 [0.326;0.6 [-0.18;0.9 [0.302;0.6 [-0.108;0.9 [-0.165;0.9 [-0.097;0.9 [0.468;0.5  
[-0.211;0.7 [0.561;-0.4 [0.413;-0.5 [0.707;0;0; [0.409;-0.4 [0.701;0.0 [0.738;0;-C [0.707;0;-C [-0.52;0.47  
[0.461;0.4 [-0.5;0.5;-C [-0.618;0.3 [0.395;0.1 [-0.64;0.3 [-0.541;0.1 [0.35;0;-0. [-0.531;0.1 [-0.53;0.46  
[0.347;0.3 [0.5;0.5;0. [0.585;0.3 [0.558;0.2 [0.577;0.3 [0.453;0.3 [0.553;0.2 [0.457;0.3 [0.479;0.5  
[-0.347;-0. [-0.5;-6.25 [0.463;0.4 [-0.477;-0. [0.491;0.4 [0.449;0.4 [-0.816;0;C [-0.408;-0. [-0.408;-0.  
[-0.289-0.5 [-0.5;-0.5;- [0.616;-0.2 [-0.707;0;C [0.702;-0.4 [0.715;-0.3 [0.436;0.6 [0.408;-0.5 [-0.707;0;C  
[-0.289+0. [-0.5;-6.25 [0.606;-0.6 [-0.217-0.2 [0.702;-0.4 [0.715;-0.3 [0;1;0;0] [-0.707;0;C [-0.408;0.5  
[-0.461;-0. [-0.5;0.5;-C [0.616;-0.2 [-0.217+0. [-0.707;0;C [-0.707;0;C [0.226;0;-C [-0.518;0;- [-0.707;0;C  
[-0.393011 [0.5;2.220 [0.577584 [-0.707106 [-0.570868 [-0.622878 [0.816496 [0.707106 [-0.632455  
[-0.288675 [0.5;2.220 [0.577584 [-0.247389 [-0.693463 [0.690496 [0.129868 [-0.457423 [-0.632455  
[-0.288675 [-0.5;0.5;-C [-0.701400 [-0.247389 [-0.693463 [0.690496 [-0.138675 [-0.472894 [-0.475421  
[-0.481031 [-0.5;-0.5;- [0.435795 [0.467585 [-0.425398 [-0.438232 [0.436435 [-0.421368 [0.396620  
[-0.415053 [0-0.5i;-0.5 [0.604744 [0.707106 [-0.711674 [-0.721722 [0.816496 [-0.429877 [-0.670820  
[-0.577350 [0+0.5i;-0. [0.604744 [-0.137769 [0.541704 [-0.739221 [0.143415 [-0.707106 [0.632455  
[-0.577350 [-0.5;0.5;-C [0.354687 [-0.137769 [0.541704 [-0.680319 [0.288675 [0.151833 [0.240446  
[-0.490577 [0.5;0.5;0. [-0.482717 [0.517357 [0.540831 [-0.511948 [-0.436435 [0.442193 [-0.438389

15330 31710

[0;0;-0.707[0.789;-0.211;-0.577;0]

[-0.816;0;C[-0.211;0.789;-0.577;0]

[-0.845;0.3[0.289;0.289;0.289;-0.866]

[0.389;0.5:[0.5;0.5;0.5;0.5]

[0.4241;0.6[0.5;0.5;0.5;0.5]

[0.7301;-0.[-0.2113;0.7887;-0.5774;0]

[0.6243;0.[-0.2887;-0.2887;-0.2887;0.866]

[0;0;-0.707[0.7887;-0.2113;-0.5774;0]

[0.7709;-0.[-0.03068;0.7219;-0.6913;0]

[0.7709;-0.[-0.8159;0.3814;0.4345;0]

[0;0;-0.707[0.2887;0.2887;0.2887;-0.866]

[0.3462;0.4[0.5;0.5;0.5;0.5]

[0.645;-0.7[0.707;-0.707;0;0]

[0;0;0.707;[-0.471;-0.471;0.236;0.707]

[0.67;0.38[-0.167;-0.167;0.833;-0.5]

[0.368;0.5[0.5;0.5;0.5;0.5]

[0.56;0.49[0.5;0.5;0.5;0.5]

[0.67;-0.74[-0.211;0.789;-0.577;0]

[-0.488;-0.[-0.289;-0.289;-0.289;0.866]

[0;0;-0.707[0.789;-0.211;-0.577;0]

[0.546;0.6[0.789;-0.211;-0.577;0]

[0.743;-0.6[-0.211;0.789;-0.577;0]

[0;0;-0.707[0.289;0.289;0.289;-0.866]

[0.388;0.4[0.5;0.5;0.5;0.5]

[-0.845;0.3[0.789;-0.211;-0.577;0]

[0.389;0.5:[-0.211;0.789;-0.577;0]

[-0.816;0;C[0.289;0.289;0.289;-0.866]

[0;0;-0.707[0.5;0.5;0.5;0.5]

[0;-4.5418:[0.0845509893628813;0.0845509893628811;-0.781474414421557;0.61237243569579

[0.836670:[0.707106781186547;-0.707106781186547;0;0]

[0.836670:[-0.492799279826744;-0.492799279826744;0.373226123957694;0.612372435695794

[-0.397135[-0.5;-0.5;-0.5;-0.5]

[0.778519:[0.18396242432651;-0.140744645025961;-0.709146118863571;0.665928339563022]

[-1.240126[-0.137071838177439;-0.758818756867048;0.493196961916072;0.402693633128415

[-0.719758[0.835086305488583;-0.392918616412182;-0.0621975791931702;-0.37997010988323

[-0.437836[-0.5;-0.5;-0.5;-0.5]

2435695794]

35695794]

33128415]

010988323]
