# Supplementary material for: Dissecting molecular network structures using a network subgraph approach
Source: PubMed Central journal article supplement (PMC7512139; doi:10.7717/peerj.9556), 2020-08-06
Supplement: peerj-08-9556-s008.pdf [file peerj-08-9556-s008.pdf]

| pattern id | R | r        | a_bar  |
|------------|---|----------|--------|
| 14         | 0 | -0.3333  | 0.25   |
| 28         | 0 | -0.3333  | 0.25   |
| 30         | 0 | 0.25     | 0.3333 |
| 74         | 0 | -0.3333  | 0.25   |
| 76         | 0 | -0.3333  | 0.25   |
| 78         | 0 | -0.5     | 0.3333 |
| 90         | 0 | 0.25     | 0.3333 |
| 92         | 0 | -0.5     | 0.3333 |
| 94         | 0 | -0.02857 | 0.4167 |
| 204        | 0 | -0.5     | 0.3333 |
| 206        | 0 | -0.7143  | 0.4167 |
| 222        | 0 | -0.3333  | 0.5    |
| 280        | 0 | -0.3333  | 0.25   |
| 282        | 0 | 0.25     | 0.3333 |
| 286        | 0 | 0.6571   | 0.4167 |
| 328        | 0 | -0.3333  | 0.25   |
| 330        | 0 | -0.5     | 0.3333 |
| 332        | 0 | 0.25     | 0.3333 |
| 334        | 0 | -0.02857 | 0.4167 |
| 344        | 0 | -0.5     | 0.3333 |
| 346        | 0 | -0.02857 | 0.4167 |
| 348        | 0 | -0.02857 | 0.4167 |
| 350        | 0 | 0.3333   | 0.5    |
| 390        | 0 | 0.25     | 0.3333 |
| 392        | 0 | -0.3333  | 0.25   |
| 394        | 0 | -0.5     | 0.3333 |
| 396        | 0 | 0.25     | 0.3333 |
| 398        | 0 | -0.02857 | 0.4167 |
| 404        | 0 | 0.25     | 0.3333 |
| 406        | 0 | 0.6571   | 0.4167 |
| 408        | 0 | -0.5     | 0.3333 |
| 410        | 0 | -0.02857 | 0.4167 |
| 412        | 0 | -0.02857 | 0.4167 |
| 414        | 0 | 0.3333   | 0.5    |
| 454        | 0 | -0.02857 | 0.4167 |
| 456        | 0 | -0.5     | 0.3333 |
| 458        | 0 | -0.7143  | 0.4167 |
| 460        | 0 | -0.02857 | 0.4167 |
| 462        | 0 | -0.3333  | 0.5    |
| 468        | 0 | -0.02857 | 0.4167 |
| 470        | 0 | 0.3333   | 0.5    |
| 472        | 0 | -0.7143  | 0.4167 |
| 474        | 0 | -0.3333  | 0.5    |
| 476        | 0 | -0.3333  | 0.5    |

|      |   |          |        |
|------|---|----------|--------|
| 478  | 0 | -0.02857 | 0.5833 |
| 856  | 0 | -0.02857 | 0.4167 |
| 858  | 0 | 0.3333   | 0.5    |
| 862  | 0 | 0.6571   | 0.5833 |
| 904  | 0 | -0.5     | 0.3333 |
| 906  | 0 | -0.7143  | 0.4167 |
| 908  | 0 | -0.02857 | 0.4167 |
| 910  | 0 | -0.3333  | 0.5    |
| 922  | 0 | -0.3333  | 0.5    |
| 924  | 0 | -0.3333  | 0.5    |
| 926  | 0 | -0.02857 | 0.5833 |
| 972  | 0 | 0.3333   | 0.5    |
| 974  | 0 | -0.02857 | 0.5833 |
| 990  | 0 | 0.25     | 0.6667 |
| 2184 | 0 | -0.3333  | 0.25   |
| 2186 | 0 | -0.5     | 0.3333 |
| 2190 | 0 | -0.7143  | 0.4167 |
| 2202 | 0 | -0.02857 | 0.4167 |
| 2204 | 0 | -0.7143  | 0.4167 |
| 2206 | 0 | -0.3333  | 0.5    |
| 2252 | 0 | -0.7143  | 0.4167 |
| 2254 | 0 | -1       | 0.5    |
| 2270 | 0 | -0.7143  | 0.5833 |
| 2458 | 0 | -0.3333  | 0.5    |
| 2462 | 0 | -0.02857 | 0.5833 |
| 2506 | 0 | -1       | 0.5    |
| 2510 | 0 | -0.7143  | 0.5833 |
| 2524 | 0 | -0.7143  | 0.5833 |
| 2526 | 0 | -0.5     | 0.6667 |
| 3038 | 0 | -0.3333  | 0.75   |
| 4370 | 0 | 0.25     | 0.3333 |
| 4374 | 0 | 0.6571   | 0.4167 |
| 4382 | 1 | 1        | 0.5    |
| 4418 | 0 | -0.5     | 0.3333 |
| 4420 | 0 | 0.25     | 0.3333 |
| 4422 | 0 | -0.02857 | 0.4167 |
| 4424 | 0 | 0.25     | 0.3333 |
| 4426 | 0 | -0.02857 | 0.4167 |
| 4428 | 0 | 0.6571   | 0.4167 |
| 4430 | 0 | 0.3333   | 0.5    |
| 4434 | 0 | -0.02857 | 0.4167 |
| 4436 | 0 | -0.02857 | 0.4167 |
| 4438 | 0 | 0.3333   | 0.5    |
| 4440 | 0 | -0.02857 | 0.4167 |
| 4442 | 0 | 0.3333   | 0.5    |

|      |   |          |        |
|------|---|----------|--------|
| 4444 | 0 | 0.3333   | 0.5    |
| 4446 | 0 | 0.6571   | 0.5833 |
| 4546 | 0 | -0.7143  | 0.4167 |
| 4548 | 0 | -0.02857 | 0.4167 |
| 4550 | 0 | -0.3333  | 0.5    |
| 4556 | 0 | 0.3333   | 0.5    |
| 4558 | 0 | -0.02857 | 0.5833 |
| 4562 | 0 | -0.3333  | 0.5    |
| 4564 | 0 | -0.3333  | 0.5    |
| 4566 | 0 | -0.02857 | 0.5833 |
| 4572 | 0 | -0.02857 | 0.5833 |
| 4574 | 0 | 0.25     | 0.6667 |
| 4678 | 0 | -0.02857 | 0.4167 |
| 4682 | 0 | 0.6571   | 0.4167 |
| 4686 | 0 | 0.3333   | 0.5    |
| 4692 | 0 | -0.02857 | 0.4167 |
| 4694 | 0 | 0.3333   | 0.5    |
| 4698 | 1 | 1        | 0.5    |
| 4700 | 0 | 0.3333   | 0.5    |
| 4702 | 0 | 0.6571   | 0.5833 |
| 4740 | 0 | -0.5     | 0.3333 |
| 4742 | 0 | -0.7143  | 0.4167 |
| 4748 | 0 | -0.02857 | 0.4167 |
| 4750 | 0 | -0.3333  | 0.5    |
| 4758 | 0 | -0.3333  | 0.5    |
| 4764 | 0 | -0.3333  | 0.5    |
| 4766 | 0 | -0.02857 | 0.5833 |
| 4812 | 0 | 0.3333   | 0.5    |
| 4814 | 0 | -0.02857 | 0.5833 |
| 4830 | 0 | 0.25     | 0.6667 |
| 4946 | 0 | 0.3333   | 0.5    |
| 4950 | 0 | 0.6571   | 0.5833 |
| 4952 | 0 | 0.3333   | 0.5    |
| 4954 | 0 | 0.6571   | 0.5833 |
| 4958 | 1 | 1        | 0.6667 |
| 4994 | 0 | -0.7143  | 0.4167 |
| 4998 | 0 | -0.3333  | 0.5    |
| 5002 | 0 | -0.3333  | 0.5    |
| 5004 | 0 | 0.3333   | 0.5    |
| 5006 | 0 | -0.02857 | 0.5833 |
| 5010 | 0 | -0.3333  | 0.5    |
| 5012 | 0 | -0.3333  | 0.5    |
| 5014 | 0 | -0.02857 | 0.5833 |
| 5016 | 0 | -0.3333  | 0.5    |
| 5018 | 0 | -0.02857 | 0.5833 |

|      |   |          |        |
|------|---|----------|--------|
| 5020 | 0 | -0.02857 | 0.5833 |
| 5022 | 0 | 0.25     | 0.6667 |
| 5058 | 0 | -0.3333  | 0.5    |
| 5062 | 0 | -0.02857 | 0.5833 |
| 5064 | 0 | 0.3333   | 0.5    |
| 5066 | 0 | -0.02857 | 0.5833 |
| 5068 | 0 | 0.6571   | 0.5833 |
| 5070 | 0 | 0.25     | 0.6667 |
| 5074 | 0 | -0.02857 | 0.5833 |
| 5076 | 0 | -0.02857 | 0.5833 |
| 5078 | 0 | 0.25     | 0.6667 |
| 5080 | 0 | -0.02857 | 0.5833 |
| 5082 | 0 | 0.25     | 0.6667 |
| 5084 | 0 | 0.25     | 0.6667 |
| 5086 | 0 | 0.5556   | 0.75   |
| 6342 | 0 | -1       | 0.5    |
| 6348 | 0 | -0.3333  | 0.5    |
| 6350 | 0 | -0.7143  | 0.5833 |
| 6356 | 0 | -1       | 0.5    |
| 6358 | 0 | -0.7143  | 0.5833 |
| 6364 | 0 | -0.7143  | 0.5833 |
| 6366 | 0 | -0.5     | 0.6667 |
| 6550 | 0 | -0.02857 | 0.5833 |
| 6552 | 0 | -0.3333  | 0.5    |
| 6554 | 0 | -0.02857 | 0.5833 |
| 6558 | 0 | 0.25     | 0.6667 |
| 6598 | 0 | -0.7143  | 0.5833 |
| 6602 | 0 | -0.7143  | 0.5833 |
| 6604 | 0 | -0.02857 | 0.5833 |
| 6606 | 0 | -0.5     | 0.6667 |
| 6614 | 0 | -0.5     | 0.6667 |
| 6616 | 0 | -0.7143  | 0.5833 |
| 6618 | 0 | -0.5     | 0.6667 |
| 6620 | 0 | -0.5     | 0.6667 |
| 6622 | 0 | -0.3333  | 0.75   |
| 6854 | 0 | -0.7143  | 0.5833 |
| 6858 | 0 | -0.02857 | 0.5833 |
| 6862 | 0 | -0.5     | 0.6667 |
| 6870 | 0 | -0.5     | 0.6667 |
| 6874 | 0 | 0.25     | 0.6667 |
| 6876 | 0 | -0.5     | 0.6667 |
| 6878 | 0 | -0.3333  | 0.75   |
| 7126 | 0 | -0.3333  | 0.75   |
| 7128 | 0 | -0.5     | 0.6667 |
| 7130 | 0 | -0.3333  | 0.75   |

|       |   |          |        |
|-------|---|----------|--------|
| 7134  | 0 | -0.2     | 0.8333 |
| 13142 | 0 | 0.25     | 0.6667 |
| 13146 | 0 | 0.25     | 0.6667 |
| 13148 | 0 | 0.25     | 0.6667 |
| 13150 | 0 | 0.5556   | 0.75   |
| 13260 | 1 | 1        | 0.6667 |
| 13262 | 0 | 0.5556   | 0.75   |
| 13278 | 1 | 1        | 0.8333 |
| 14678 | 0 | -0.5     | 0.6667 |
| 14686 | 0 | -0.3333  | 0.75   |
| 14790 | 0 | -0.5     | 0.6667 |
| 14798 | 0 | -0.3333  | 0.75   |
| 14810 | 0 | -0.3333  | 0.75   |
| 14812 | 0 | -0.3333  | 0.75   |
| 14814 | 0 | -0.2     | 0.8333 |
| 15258 | 0 | -0.3333  | 0.75   |
| 15262 | 0 | -0.2     | 0.8333 |
| 15310 | 0 | -0.2     | 0.8333 |
| 15326 | 0 | -0.09091 | 0.9167 |
| 31710 | 1 | 1        | 1      |
