# Supplementary material for: Dissecting molecular network structures using a network subgraph approach
Source: PubMed Central journal article supplement (PMC7512139; doi:10.7717/peerj.9556), 2020-08-06
Supplement: peerj-08-9556-s009.pdf [file peerj-08-9556-s009.pdf]

| ID  | E | P | CC=E-N+2P | KC    | rank |
|-----|---|---|-----------|-------|------|
| 14  | 3 | 3 | 5         | 33.80 | 1    |
| 28  | 3 | 2 | 3         | 35.38 | 3    |
| 30  | 4 | 2 | 4         | 35.23 | 2    |
| 74  | 3 | 2 | 3         | 36.32 | 5    |
| 76  | 3 | 2 | 3         | 36.40 | 6    |
| 78  | 4 | 2 | 4         | 36.25 | 4    |
| 90  | 4 | 2 | 4         | 38.16 | 22   |
| 92  | 4 | 2 | 4         | 38.24 | 29   |
| 94  | 5 | 2 | 5         | 38.09 | 18   |
| 204 | 4 | 2 | 4         | 38.26 | 30   |
| 206 | 5 | 2 | 5         | 38.11 | 20   |
| 222 | 6 | 2 | 6         | 39.27 | 66   |
| 280 | 3 | 1 | 1         | 38.17 | 24   |
| 282 | 4 | 1 | 2         | 38.24 | 28   |
| 286 | 5 | 1 | 3         | 38.17 | 24   |
| 328 | 3 | 1 | 1         | 36.71 | 7    |
| 330 | 4 | 1 | 2         | 36.78 | 9    |
| 332 | 4 | 1 | 2         | 36.86 | 10   |
| 334 | 5 | 1 | 3         | 36.71 | 7    |
| 344 | 4 | 1 | 2         | 38.72 | 38   |
| 346 | 5 | 1 | 3         | 38.79 | 40   |
| 348 | 5 | 1 | 3         | 38.87 | 43   |
| 350 | 6 | 1 | 4         | 38.72 | 38   |
| 390 | 4 | 1 | 2         | 38.71 | 37   |
| 392 | 3 | 1 | 1         | 38.49 | 33   |
| 394 | 4 | 1 | 2         | 38.56 | 35   |
| 396 | 4 | 1 | 2         | 38.64 | 36   |
| 398 | 5 | 1 | 3         | 38.49 | 33   |
| 404 | 4 | 1 | 2         | 39.77 | 77   |
| 406 | 5 | 1 | 3         | 39.92 | 83   |
| 408 | 4 | 1 | 2         | 39.70 | 74   |
| 410 | 5 | 1 | 3         | 39.77 | 78   |
| 412 | 5 | 1 | 3         | 39.85 | 80   |
| 414 | 6 | 1 | 4         | 39.70 | 74   |
| 454 | 5 | 1 | 3         | 39.17 | 64   |
| 456 | 4 | 1 | 2         | 38.95 | 48   |
| 458 | 5 | 1 | 3         | 39.02 | 54   |
| 460 | 5 | 1 | 3         | 39.10 | 60   |
| 462 | 6 | 1 | 4         | 38.95 | 48   |
| 468 | 5 | 1 | 3         | 40.29 | 100  |
| 470 | 6 | 1 | 4         | 40.44 | 106  |
| 472 | 5 | 1 | 3         | 40.22 | 94   |
| 474 | 6 | 1 | 4         | 40.29 | 101  |
| 476 | 6 | 1 | 4         | 40.37 | 104  |

|      |   |   |   |       |     |
|------|---|---|---|-------|-----|
| 478  | 7 | 1 | 5 | 40.22 | 94  |
| 856  | 5 | 1 | 3 | 38.86 | 41  |
| 858  | 6 | 1 | 4 | 38.93 | 47  |
| 862  | 7 | 1 | 5 | 38.86 | 41  |
| 904  | 4 | 1 | 2 | 39.41 | 70  |
| 906  | 5 | 1 | 3 | 39.48 | 72  |
| 908  | 5 | 1 | 3 | 39.56 | 73  |
| 910  | 6 | 1 | 4 | 39.41 | 70  |
| 922  | 6 | 1 | 4 | 41.11 | 132 |
| 924  | 6 | 1 | 4 | 41.19 | 133 |
| 926  | 7 | 1 | 5 | 41.04 | 129 |
| 972  | 6 | 1 | 4 | 39.85 | 80  |
| 974  | 7 | 1 | 5 | 39.70 | 74  |
| 990  | 8 | 1 | 6 | 40.54 | 110 |
| 2184 | 3 | 1 | 1 | 38.07 | 16  |
| 2186 | 4 | 1 | 2 | 38.15 | 21  |
| 2190 | 5 | 1 | 3 | 38.07 | 16  |
| 2202 | 5 | 1 | 3 | 38.97 | 52  |
| 2204 | 5 | 1 | 3 | 39.05 | 56  |
| 2206 | 6 | 1 | 4 | 38.90 | 44  |
| 2252 | 5 | 1 | 3 | 40.07 | 88  |
| 2254 | 6 | 1 | 4 | 39.92 | 84  |
| 2270 | 7 | 1 | 5 | 41.06 | 130 |
| 2458 | 6 | 1 | 4 | 39.98 | 86  |
| 2462 | 7 | 1 | 5 | 39.91 | 82  |
| 2506 | 6 | 1 | 4 | 41.39 | 138 |
| 2510 | 7 | 1 | 5 | 41.32 | 135 |
| 2524 | 7 | 1 | 5 | 42.70 | 189 |
| 2526 | 8 | 1 | 6 | 42.55 | 186 |
| 3038 | 9 | 1 | 7 | 42.79 | 191 |
| 4370 | 4 | 0 | 0 | 37.95 | 15  |
| 4374 | 5 | 0 | 1 | 38.10 | 19  |
| 4382 | 6 | 0 | 2 | 37.88 | 14  |
| 4418 | 4 | 0 | 0 | 40.25 | 97  |
| 4420 | 4 | 0 | 0 | 40.25 | 97  |
| 4422 | 5 | 0 | 1 | 40.39 | 105 |
| 4424 | 4 | 0 | 0 | 40.17 | 92  |
| 4426 | 5 | 0 | 1 | 40.25 | 99  |
| 4428 | 5 | 0 | 1 | 40.33 | 103 |
| 4430 | 6 | 0 | 2 | 40.17 | 92  |
| 4434 | 5 | 0 | 1 | 38.97 | 50  |
| 4436 | 5 | 0 | 1 | 38.97 | 50  |
| 4438 | 6 | 0 | 2 | 39.12 | 61  |
| 4440 | 5 | 0 | 1 | 38.90 | 44  |
| 4442 | 6 | 0 | 2 | 38.97 | 52  |

|      |   |   |   |       |     |
|------|---|---|---|-------|-----|
| 4444 | 6 | 0 | 2 | 39.05 | 56  |
| 4446 | 7 | 0 | 3 | 38.90 | 44  |
| 4546 | 5 | 0 | 1 | 41.77 | 150 |
| 4548 | 5 | 0 | 1 | 41.77 | 150 |
| 4550 | 6 | 0 | 2 | 41.92 | 161 |
| 4556 | 6 | 0 | 2 | 41.85 | 157 |
| 4558 | 7 | 0 | 3 | 41.70 | 143 |
| 4562 | 6 | 0 | 2 | 40.15 | 90  |
| 4564 | 6 | 0 | 2 | 40.15 | 90  |
| 4566 | 7 | 0 | 3 | 40.30 | 102 |
| 4572 | 7 | 0 | 3 | 40.23 | 96  |
| 4574 | 8 | 0 | 4 | 40.08 | 89  |
| 4678 | 5 | 0 | 1 | 37.67 | 13  |
| 4682 | 5 | 0 | 1 | 37.53 | 12  |
| 4686 | 6 | 0 | 2 | 37.45 | 11  |
| 4692 | 5 | 0 | 1 | 38.23 | 26  |
| 4694 | 6 | 0 | 2 | 38.38 | 32  |
| 4698 | 6 | 0 | 2 | 38.24 | 27  |
| 4700 | 6 | 0 | 2 | 38.32 | 31  |
| 4702 | 7 | 0 | 3 | 38.16 | 23  |
| 4740 | 4 | 0 | 0 | 39.23 | 65  |
| 4742 | 5 | 0 | 1 | 39.38 | 69  |
| 4748 | 5 | 0 | 1 | 39.32 | 68  |
| 4750 | 6 | 0 | 2 | 39.16 | 63  |
| 4758 | 6 | 0 | 2 | 40.02 | 87  |
| 4764 | 6 | 0 | 2 | 39.95 | 85  |
| 4766 | 7 | 0 | 3 | 39.80 | 79  |
| 4812 | 6 | 0 | 2 | 41.36 | 137 |
| 4814 | 7 | 0 | 3 | 41.21 | 134 |
| 4830 | 8 | 0 | 4 | 40.86 | 123 |
| 4946 | 6 | 0 | 2 | 40.57 | 112 |
| 4950 | 7 | 0 | 3 | 40.72 | 120 |
| 4952 | 6 | 0 | 2 | 40.50 | 108 |
| 4954 | 7 | 0 | 3 | 40.57 | 113 |
| 4958 | 8 | 0 | 4 | 40.50 | 108 |
| 4994 | 5 | 0 | 1 | 40.62 | 115 |
| 4998 | 6 | 0 | 2 | 40.77 | 121 |
| 5002 | 6 | 0 | 2 | 40.62 | 116 |
| 5004 | 6 | 0 | 2 | 40.70 | 118 |
| 5006 | 7 | 0 | 3 | 40.55 | 111 |
| 5010 | 6 | 0 | 2 | 41.80 | 152 |
| 5012 | 6 | 0 | 2 | 41.80 | 152 |
| 5014 | 7 | 0 | 3 | 41.95 | 162 |
| 5016 | 6 | 0 | 2 | 41.73 | 145 |
| 5018 | 7 | 0 | 3 | 41.80 | 155 |

|      |   |   |   |       |     |
|------|---|---|---|-------|-----|
| 5020 | 7 | 0 | 3 | 41.88 | 158 |
| 5022 | 8 | 0 | 4 | 41.73 | 145 |
| 5058 | 6 | 0 | 2 | 41.80 | 152 |
| 5062 | 7 | 0 | 3 | 41.95 | 162 |
| 5064 | 6 | 0 | 2 | 41.73 | 145 |
| 5066 | 7 | 0 | 3 | 41.80 | 155 |
| 5068 | 7 | 0 | 3 | 41.88 | 158 |
| 5070 | 8 | 0 | 4 | 41.73 | 145 |
| 5074 | 7 | 0 | 3 | 42.37 | 178 |
| 5076 | 7 | 0 | 3 | 42.37 | 178 |
| 5078 | 8 | 0 | 4 | 42.52 | 185 |
| 5080 | 7 | 0 | 3 | 42.30 | 174 |
| 5082 | 8 | 0 | 4 | 42.37 | 180 |
| 5084 | 8 | 0 | 4 | 42.45 | 182 |
| 5086 | 9 | 0 | 5 | 42.30 | 174 |
| 6342 | 6 | 0 | 2 | 40.66 | 117 |
| 6348 | 6 | 0 | 2 | 40.60 | 114 |
| 6350 | 7 | 0 | 3 | 40.44 | 107 |
| 6356 | 6 | 0 | 2 | 42.15 | 170 |
| 6358 | 7 | 0 | 3 | 42.30 | 176 |
| 6364 | 7 | 0 | 3 | 42.23 | 172 |
| 6366 | 8 | 0 | 4 | 42.08 | 167 |
| 6550 | 7 | 0 | 3 | 39.28 | 67  |
| 6552 | 6 | 0 | 2 | 39.06 | 58  |
| 6554 | 7 | 0 | 3 | 39.13 | 62  |
| 6558 | 8 | 0 | 4 | 39.06 | 58  |
| 6598 | 7 | 0 | 3 | 42.11 | 168 |
| 6602 | 7 | 0 | 3 | 41.97 | 165 |
| 6604 | 7 | 0 | 3 | 42.05 | 166 |
| 6606 | 8 | 0 | 4 | 41.89 | 160 |
| 6614 | 8 | 0 | 4 | 41.72 | 144 |
| 6616 | 7 | 0 | 3 | 41.50 | 139 |
| 6618 | 8 | 0 | 4 | 41.57 | 141 |
| 6620 | 8 | 0 | 4 | 41.65 | 142 |
| 6622 | 9 | 0 | 5 | 41.50 | 139 |
| 6854 | 7 | 0 | 3 | 42.47 | 183 |
| 6858 | 7 | 0 | 3 | 42.32 | 177 |
| 6862 | 8 | 0 | 4 | 42.25 | 173 |
| 6870 | 8 | 0 | 4 | 40.93 | 126 |
| 6874 | 8 | 0 | 4 | 40.78 | 122 |
| 6876 | 8 | 0 | 4 | 40.86 | 124 |
| 6878 | 9 | 0 | 5 | 40.71 | 119 |
| 7126 | 9 | 0 | 5 | 43.15 | 195 |
| 7128 | 8 | 0 | 4 | 42.93 | 192 |
| 7130 | 9 | 0 | 5 | 43.00 | 194 |

|       |    |   |   |       |     |
|-------|----|---|---|-------|-----|
| 7134  | 10 | 0 | 6 | 42.93 | 192 |
| 13142 | 8  | 0 | 4 | 41.10 | 131 |
| 13146 | 8  | 0 | 4 | 40.95 | 127 |
| 13148 | 8  | 0 | 4 | 41.03 | 128 |
| 13150 | 9  | 0 | 5 | 40.88 | 125 |
| 13260 | 8  | 0 | 4 | 43.32 | 197 |
| 13262 | 9  | 0 | 5 | 43.16 | 196 |
| 13278 | 10 | 0 | 6 | 42.50 | 184 |
| 14678 | 8  | 0 | 4 | 41.95 | 162 |
| 14686 | 9  | 0 | 5 | 41.73 | 145 |
| 14790 | 8  | 0 | 4 | 42.38 | 181 |
| 14798 | 9  | 0 | 5 | 42.16 | 171 |
| 14810 | 9  | 0 | 5 | 42.62 | 188 |
| 14812 | 9  | 0 | 5 | 42.70 | 189 |
| 14814 | 10 | 0 | 6 | 42.55 | 186 |
| 15258 | 9  | 0 | 5 | 43.74 | 199 |
| 15262 | 10 | 0 | 6 | 43.67 | 198 |
| 15310 | 10 | 0 | 6 | 42.12 | 169 |
| 15326 | 11 | 0 | 7 | 41.32 | 135 |
| 31710 | 12 | 0 | 8 | 39.04 | 55  |
