# Supplementary material for: Dissecting molecular network structures using a network subgraph approach
Source: PubMed Central journal article supplement (PMC7512139; doi:10.7717/peerj.9556), 2020-08-06
Supplement: peerj-08-9556-s010.pdf [file peerj-08-9556-s010.pdf]

Supplementary Table 9. The results of driver genes embedded in subgraph module and non-subgraph module. A pseudo-count was added if the number of embedded is zero, because the odds ratio is not well-defined. Odds ratio and total number of genes are listed in the last column. An odds ratio greater than one implies that driver genes are enriched in subgraph module.

| Cancer Networks                         |                 | Genes embedded in subgraph | Genes not embedded in subgraph | Odds ratio/total |
|-----------------------------------------|-----------------|----------------------------|--------------------------------|------------------|
| Acute myeloid leukemia [hsa05221]       | Driver gene     | 18                         | 0+1 (pseudo-count)             | 0.720            |
|                                         | Non-driver gene | 25                         | 0+1 (pseudo-count)             |                  |
|                                         | Total           | 43                         | 2                              | 45               |
| Basal cell carcinoma [hsa05217]         | Driver gene     | 8                          | 1                              | 0.615            |
|                                         | Non-driver gene | 13                         | 1                              |                  |
|                                         | Total           | 21                         | 2                              | 23               |
| Breast cancer [hsa05224]                | Driver gene     | 23                         | 4                              | 1.643            |
|                                         | Non-driver gene | 28                         | 8                              |                  |
|                                         | Total           | 51                         | 12                             | 63               |
| Choline metabolism in cancer [hsa05231] | Driver gene     | 10                         | 2                              | 2.353            |
|                                         | Non-driver gene | 17                         | 8                              |                  |
|                                         | Total           | 27                         | 10                             | 37               |
| Chronic myeloid leukemia [hsa05220]     | Driver gene     | 16                         | 5                              | 0.762            |
|                                         | Non-driver gene | 21                         | 5                              |                  |
|                                         | Total           | 37                         | 10                             | 47               |
| Colorectal cancer [hsa05210]            | Driver gene     | 16                         | 5                              | 0.914            |
|                                         | Non-driver gene | 21                         | 6                              |                  |
|                                         | Total           | 37                         | 11                             | 48               |
| Endometrial cancer [hsa05213]           | Driver gene     | 14                         | 5                              | 0.560            |
|                                         | Non-driver gene | 15                         | 3                              |                  |
|                                         | Total           | 29                         | 8                              | 37               |
| Gastric cancer [hsa05226]               | Driver gene     | 21                         | 7                              | 1.355            |
|                                         | Non-driver gene | 31                         | 14                             |                  |
|                                         | Total           | 52                         | 21                             | 73               |
| Glioma [hsa05214]                       | Driver gene     | 13                         | 4                              | 0.181            |
|                                         | Non-driver gene | 18                         | 1                              |                  |
|                                         | Total           | 31                         | 5                              | 36               |
| Hepatocellular carcinoma [hsa05225]     | Driver gene     | 21                         | 11                             | 1.074            |
|                                         | Non-driver gene | 32                         | 18                             |                  |
|                                         | Total           | 53                         | 29                             | 82               |
| Melanoma [hsa05218]                     | Driver gene     | 15                         | 3                              | 0.500            |
|                                         | Non-driver gene | 10                         | 0+1 (pseudo-count)             |                  |
|                                         | Total           | 25                         | 4                              | 29               |
| Non-small cell lung cancer [hsa05223]   | Driver gene     | 18                         | 2                              | 2.500            |
|                                         | Non-driver gene | 18                         | 5                              |                  |
|                                         | Total           | 36                         | 7                              | 43               |
| Pancreatic cancer [hsa05212]            | Driver gene     | 19                         | 2                              | 0.704            |
|                                         | Non-driver gene | 27                         | 2                              |                  |
|                                         | Total           | 46                         | 4                              | 50               |
| Pathways in cancer [hsa05200]           | Driver gene     | 52                         | 2                              | 2.187            |
|                                         | Non-driver gene | 107                        | 9                              |                  |

|                                       |                 |     |    |       |
|---------------------------------------|-----------------|-----|----|-------|
|                                       | Total           | 159 | 11 | 170   |
| Prostate cancer<br>[hsa05215]         | Driver gene     | 16  | 7  | 1.143 |
|                                       | Non-driver gene | 20  | 10 |       |
|                                       | Total           | 36  | 17 | 53    |
| Renal cell<br>carcinoma<br>[hsa05211] | Driver gene     | 11  | 6  | 0.509 |
|                                       | Non-driver gene | 18  | 5  |       |
|                                       | Total           | 29  | 11 | 40    |
| Small cell lung<br>cancer [hsa05222]  | Driver gene     | 8   | 6  | 0.286 |
|                                       | Non-driver gene | 28  | 6  |       |
|                                       | Total           | 36  | 12 | 48    |

| STN                                                       |                 | Genes embedded<br>in subgraph | Genes not embedded<br>in subgraph | Odds<br>ratio/total |
|-----------------------------------------------------------|-----------------|-------------------------------|-----------------------------------|---------------------|
| Adipocytokine<br>signaling pathway<br>[hsa04920]          | Driver gene     | 4                             | 0+1 (pseudo-count)                | 0.414               |
|                                                           | Non-driver gene | 29                            | 3                                 |                     |
|                                                           | Total           | 33                            | 4                                 | 37                  |
| AMPK signaling<br>pathway [hsa04152]                      | Driver gene     | 4                             | 4                                 | 0.262               |
|                                                           | Non-driver gene | 42                            | 11                                |                     |
|                                                           | Total           | 46                            | 15                                | 61                  |
| Apelin signaling<br>pathway [hsa04371]                    | Driver gene     | 8                             | 1                                 | 1.436               |
|                                                           | Non-driver gene | 39                            | 7                                 |                     |
|                                                           | Total           | 47                            | 8                                 | 55                  |
| B cell receptor<br>signaling pathway<br>[hsa04662]        | Driver gene     | 13                            | 3                                 | 1.857               |
|                                                           | Non-driver gene | 21                            | 9                                 |                     |
|                                                           | Total           | 34                            | 12                                | 46                  |
| Calcium signaling<br>pathway [hsa04020]                   | Driver gene     | 5                             | 0+1 (pseudo-count)                | 5.263               |
|                                                           | Non-driver gene | 19                            | 20                                |                     |
|                                                           | Total           | 24                            | 21                                | 45                  |
| cAMP signaling<br>pathway [hsa04024]                      | Driver gene     | 12                            | 1                                 | 1.309               |
|                                                           | Non-driver gene | 55                            | 6                                 |                     |
|                                                           | Total           | 67                            | 7                                 | 74                  |
| cGMP-PKG<br>signaling pathway<br>[hsa04022]               | Driver gene     | 5                             | 0+1 (pseudo-count)                | 1.136               |
|                                                           | Non-driver gene | 44                            | 10                                |                     |
|                                                           | Total           | 49                            | 11                                | 60                  |
| Chemokine<br>signaling pathway<br>[hsa04062]              | Driver gene     | 12                            | 0+1 (pseudo-count)                | 1.000               |
|                                                           | Non-driver gene | 36                            | 3                                 |                     |
|                                                           | Total           | 48                            | 4                                 | 52                  |
| C-type lectin<br>receptor signaling<br>pathway [hsa04625] | Driver gene     | 18                            | 0+1 (pseudo-count)                | 1.000               |
|                                                           | Non-driver gene | 54                            | 3                                 |                     |
|                                                           | Total           | 72                            | 4                                 | 76                  |
| ErbB signaling<br>pathway [hsa04012]                      | Driver gene     | 16                            | 1                                 | 0.444               |
|                                                           | Non-driver gene | 36                            | 0+1 (pseudo-count)                |                     |
|                                                           | Total           | 52                            | 2                                 | 54                  |
| Estrogen signaling<br>pathway [hsa04915]                  | Driver gene     | 11                            | 1                                 | 1.737               |
|                                                           | Non-driver gene | 19                            | 3                                 |                     |
|                                                           | Total           | 30                            | 4                                 | 34                  |
|                                                           | Driver gene     | 10                            | 0+1 (pseudo-count)                | 5.000               |

|                                                |                 |     |                    |       |
|------------------------------------------------|-----------------|-----|--------------------|-------|
| Fc epsilon RI signaling pathway [hsa04664]     | Non-driver gene | 20  | 10                 |       |
|                                                | Total           | 30  | 11                 | 41    |
| FoxO signaling pathway [hsa04068]              | Driver gene     | 15  | 2                  | 0.708 |
|                                                | Non-driver gene | 53  | 5                  |       |
|                                                | Total           | 68  | 7                  | 74    |
| Glucagon signaling pathway [hsa04922]          | Driver gene     | 4   | 1                  | 1.926 |
|                                                | Non-driver gene | 27  | 13                 |       |
|                                                | Total           | 31  | 14                 | 45    |
| GnRH signaling pathway [hsa04912]              | Driver gene     | 11  | 0+1 (pseudo-count) | 1.760 |
|                                                | Non-driver gene | 25  | 4                  |       |
|                                                | Total           | 36  | 5                  | 41    |
| Hedgehog signaling pathway [hsa04340]          | Driver gene     | 6   | 0+1 (pseudo-count) | 0.353 |
|                                                | Non-driver gene | 17  | 0+1 (pseudo-count) |       |
|                                                | Total           | 23  | 2                  | 25    |
| HIF-1 signaling pathway [hsa04066]             | Driver gene     | 8   | 4                  | 0.273 |
|                                                | Non-driver gene | 44  | 6                  |       |
|                                                | Total           | 52  | 10                 | 62    |
| Hippo signaling pathway [hsa04390]             | Driver gene     | 8   | 5                  | 0.4   |
|                                                | Non-driver gene | 52  | 13                 |       |
|                                                | Total           | 60  | 18                 | 78    |
| Insulin signaling pathway [hsa04910]           | Driver gene     | 9   | 2                  | 0.587 |
|                                                | Non-driver gene | 46  | 6                  |       |
|                                                | Total           | 55  | 8                  | 63    |
| Jak-STAT signaling pathway [hsa04630]          | Driver gene     | 11  | 0+1 (pseudo-count) | 0.500 |
|                                                | Non-driver gene | 22  | 1                  |       |
|                                                | Total           | 33  | 2                  | 35    |
| MAPK signaling pathway [hsa04010]              | Driver gene     | 21  | 0+1 (pseudo-count) | 0.457 |
|                                                | Non-driver gene | 92  | 2                  |       |
|                                                | Total           | 113 | 3                  | 116   |
| mTOR signaling pathway [hsa04150]              | Driver gene     | 10  | 3                  | 0.580 |
|                                                | Non-driver gene | 46  | 8                  |       |
|                                                | Total           | 56  | 11                 | 67    |
| Neurotrophin signaling pathway [hsa04722]      | Driver gene     | 21  | 1                  | 0.840 |
|                                                | Non-driver gene | 50  | 2                  |       |
|                                                | Total           | 71  | 3                  | 74    |
| NF-kappa B signaling pathway [hsa04064]        | Driver gene     | 8   | 6                  | 0.538 |
|                                                | Non-driver gene | 62  | 25                 |       |
|                                                | Total           | 70  | 31                 | 101   |
| NOD-like receptor signaling pathway [hsa04621] | Driver gene     | 9   | 0+1 (pseudo-count) | 1.862 |
|                                                | Non-driver gene | 87  | 18                 |       |
|                                                | Total           | 96  | 19                 | 115   |
| Notch signaling pathway [hsa04330]             | Driver gene     | 1   | 2                  | 0.250 |
|                                                | Non-driver gene | 16  | 8                  |       |
|                                                | Total           | 17  | 10                 | 27    |
| Oxytocin signaling pathway [hsa04921]          | Driver gene     | 11  | 1                  | 1.571 |
|                                                | Non-driver gene | 35  | 5                  |       |
|                                                | Total           | 46  | 6                  | 52    |

|                                                  |                 |    |                    |       |
|--------------------------------------------------|-----------------|----|--------------------|-------|
| p53 signaling pathway [hsa04115]                 | Driver gene     | 14 | 3                  | 0.491 |
|                                                  | Non-driver gene | 38 | 4                  |       |
|                                                  | Total           | 52 | 7                  | 59    |
| Phosphatidylinositol signaling system [hsa04070] | Driver gene     | 2  | 0+1 (pseudo-count) | 0.240 |
|                                                  | Non-driver gene | 25 | 3                  |       |
|                                                  | Total           | 27 | 4                  | 31    |
| Phospholipase D signaling pathway [hsa04072]     | Driver gene     | 12 | 1                  | 2.710 |
|                                                  | Non-driver gene | 31 | 7                  |       |
|                                                  | Total           | 43 | 8                  | 51    |
| PI3K-Akt signaling pathway [hsa04151]            | Driver gene     | 20 | 6                  | 1.020 |
|                                                  | Non-driver gene | 49 | 15                 |       |
|                                                  | Total           | 69 | 21                 | 90    |
| PPAR signaling pathway [hsa03320]                | Driver gene     | 1  | 0+1 (pseudo-count) | 0.075 |
|                                                  | Non-driver gene | 53 | 4                  |       |
|                                                  | Total           | 54 | 5                  | 58    |
| Prolactin signaling pathway [hsa04917]           | Driver gene     | 11 | 0+1 (pseudo-count) | 0.407 |
|                                                  | Non-driver gene | 27 | 1                  |       |
|                                                  | Total           | 38 | 2                  | 40    |
| Rap1 signaling pathway [hsa04015]                | Driver gene     | 13 | 1                  | 3.434 |
|                                                  | Non-driver gene | 53 | 14                 |       |
|                                                  | Total           | 66 | 15                 | 81    |
| Ras signaling pathway [hsa04014]                 | Driver gene     | 15 | 0+1 (pseudo-count) | 0.900 |
|                                                  | Non-driver gene | 50 | 3                  |       |
|                                                  | Total           | 65 | 4                  | 69    |
| Relaxin signaling pathway [hsa04926]             | Driver gene     | 11 | 1                  | 1.447 |
|                                                  | Non-driver gene | 38 | 5                  |       |
|                                                  | Total           | 49 | 6                  | 55    |
| RIG-I-like receptor signaling pathway [hsa04622] | Driver gene     | 3  | 2                  | 1.050 |
|                                                  | Non-driver gene | 30 | 21                 |       |
|                                                  | Total           | 33 | 23                 | 56    |
| Sphingolipid signaling pathway [hsa04071]        | Driver gene     | 12 | 0+1 (pseudo-count) | 3.636 |
|                                                  | Non-driver gene | 33 | 10                 |       |
|                                                  | Total           | 45 | 11                 | 56    |
| T cell receptor signaling pathway [hsa04660]     | Driver gene     | 14 | 3                  | 1.640 |
|                                                  | Non-driver gene | 37 | 13                 |       |
|                                                  | Total           | 51 | 16                 | 67    |
| TGF-beta signaling pathway [hsa04350]            | Driver gene     | 8  | 2                  | 1.517 |
|                                                  | Non-driver gene | 29 | 11                 |       |
|                                                  | Total           | 37 | 13                 | 50    |
| Thyroid hormone signaling pathway [hsa04919]     | Driver gene     | 18 | 3                  | 2.516 |
|                                                  | Non-driver gene | 31 | 13                 |       |
|                                                  | Total           | 49 | 16                 | 65    |
| TNF signaling pathway [hsa04668]                 | Driver gene     | 6  | 3                  | 1.778 |
|                                                  | Non-driver gene | 36 | 32                 |       |
|                                                  | Total           | 42 | 35                 | 77    |
|                                                  | Driver gene     | 7  | 0+1 (pseudo-count) | 0.831 |
|                                                  | Non-driver gene | 59 | 7                  |       |

|                                                 |                 |    |                    |       |
|-------------------------------------------------|-----------------|----|--------------------|-------|
| Toll-like receptor signaling pathway [hsa04620] | Total           | 66 | 8                  | 74    |
| VEGF signaling pathway [hsa04370]               | Driver gene     | 10 | 0+1 (pseudo-count) | 0.556 |
|                                                 | Non-driver gene | 18 | 0+1 (pseudo-count) |       |
|                                                 | Total           | 28 | 2                  | 30    |
| Wnt signaling pathway [hsa04310]                | Driver gene     | 13 | 1                  | 0.491 |
|                                                 | Non-driver gene | 53 | 2                  |       |
|                                                 | Total           | 66 | 3                  | 69    |

| Cellular Processes                                                  |                 | Genes embedded in subgraph | Genes not embedded in subgraph | Odds ratio/total |
|---------------------------------------------------------------------|-----------------|----------------------------|--------------------------------|------------------|
| Adherens junction [hsa04520]                                        | Driver gene     | 13                         | 3                              | 0.699            |
|                                                                     | Non-driver gene | 31                         | 5                              |                  |
|                                                                     | Total           | 44                         | 8                              | 52               |
| Apoptosis [hsa04210]                                                | Driver gene     | 17                         | 1                              | 2.194            |
|                                                                     | Non-driver gene | 62                         | 8                              |                  |
|                                                                     | Total           | 79                         | 9                              | 88               |
| Cell cycle [hsa04110]                                               | Driver gene     | 12                         | 5                              | 1.670            |
|                                                                     | Non-driver gene | 46                         | 32                             |                  |
|                                                                     | Total           | 58                         | 37                             | 95               |
| Cellular senescence [hsa04218]                                      | Driver gene     | 19                         | 5                              | 1.086            |
|                                                                     | Non-driver gene | 49                         | 14                             |                  |
|                                                                     | Total           | 68                         | 19                             | 87               |
| Focal adhesion [hsa04510]                                           | Driver gene     | 15                         | 0+1 (pseudo-count)             | 0.333            |
|                                                                     | Non-driver gene | 45                         | 1                              |                  |
|                                                                     | Total           | 60                         | 2                              | 62               |
| Gap junction [hsa04540]                                             | Driver gene     | 9                          | 0+1 (pseudo-count)             | 0.360            |
|                                                                     | Non-driver gene | 25                         | 0+1 (pseudo-count)             |                  |
|                                                                     | Total           | 34                         | 2                              | 36               |
| Necroptosis [hsa04217]                                              | Driver gene     | 8                          | 0+1 (pseudo-count)             | 1.098            |
|                                                                     | Non-driver gene | 51                         | 7                              |                  |
|                                                                     | Total           | 59                         | 8                              | 67               |
| Regulation of actin cytoskeleton [hsa04810]                         | Driver gene     | 11                         | 0+1 (pseudo-count)             | 2.933            |
|                                                                     | Non-driver gene | 45                         | 12                             |                  |
|                                                                     | Total           | 56                         | 13                             | 69               |
| Signaling pathways regulating pluripotency of stem cells [hsa04550] | Driver gene     | 19                         | 4                              | 5.700            |
|                                                                     | Non-driver gene | 20                         | 24                             |                  |
|                                                                     | Total           | 39                         | 28                             | 67               |
