# Supplementary material for: Dissecting molecular network structures using a network subgraph approach
Source: PubMed Central journal article supplement (PMC7512139; doi:10.7717/peerj.9556), 2020-08-06
Supplement: peerj-08-9556-s012.pdf [file peerj-08-9556-s012.pdf]

### 3.2 Signal transduction

- 04014 [Ras signaling pathway](#)
- 04015 [Rap1 signaling pathway](#)
- 04010 [MAPK signaling pathway](#)
- 04012 [ErbB signaling pathway](#)
- 04310 [Wnt signaling pathway](#)
- 04330 [Notch signaling pathway](#)
- 04340 [Hedgehog signaling pathway](#)
- 04350 [TGF-beta signaling pathway](#)
- 04390 [Hippo signaling pathway](#)
- 04370 [VEGF signaling pathway](#)
- 04371 [Apelin signaling pathway](#)
- 04630 [NF-kappa B signaling pathway](#)
- 04668 [TNF signaling pathway](#)
- 04066 [HIF-1 signaling pathway](#)
- 04068 [FoxO signaling pathway](#)
- 04020 [Calcium signaling pathway](#)
- 04070 [Phosphatidylinositol signaling system](#)
- 04072 [Phospholipase D signaling pathway](#)
- 04071 [Sphingolipid signaling pathway](#)
- 04024 [cAMP signaling pathway](#)
- 04022 [cGMP-PKG signaling pathway](#)
- 04151 [PI3K-Akt signaling pathway](#)
- 04152 [AMPK signaling pathway](#)
- 04150 [mTOR signaling pathway](#)

### 4.2 Cell growth and death

- 04110 [Cell cycle](#)
- 04210 [Apoptosis](#)
- 04217 [Necroptosis](#)
- 04115 [p53 signaling pathway](#)
- 04218 [Cellular senescence](#)

### 4.3 Cellular community – eukaryotes

- 04510 [Focal adhesion](#)
- 04520 [Adherens junction](#)
- 04540 [Gap junction](#)
- 04550 [Signaling pathways regulating pluripotency of stem cells](#)

### 4.5 Cell motility

- 04810 [Regulation of actin cytoskeleton](#)

### 5.1 Immune system

- 04620 [Toll-like receptor signaling pathway](#)
- 04621 [NOD-like receptor signaling pathway](#)
- 04622 [RIG-I-like receptor signaling pathway](#)
- 04625 [C-type lectin receptor signaling pathway](#)
- 04660 [T cell receptor signaling pathway](#)
- 04662 [B cell receptor signaling pathway](#)
- 04664 [Fc epsilon RI signaling pathway](#)
- 04062 [Chemokine signaling pathway](#)

## 5.2 Endocrine system

- 04910 [Insulin signaling pathway](#)
- 04922 [Glucagon signaling pathway](#)
- 04920 [Adipocytokine signaling pathway](#)
- 03320 [PPAR signaling pathway](#)
- 04912 [GnRH signaling pathway](#)
- 04915 [Estrogen signaling pathway](#)
- 04921 [Oxytocin signaling pathway](#)
- 04917 [Prolactin signaling pathway](#)
- 04926 [Relaxin signaling pathway](#)
- 04919 [Thyroid hormone signaling pathway](#)

## 5.6 Nervous system

- 04722 [Neurotrophin signaling pathway](#)

## 6.1 Cancer: overview

- 05200 [Pathways in cancer](#)
- 05231 [Choline metabolism in cancer](#)

## 6.2 Cancer: specific types

- 05210 [Colorectal cancer](#)
- 05212 [Pancreatic cancer](#)
- 05225 [Hepatocellular carcinoma](#)
- 05226 [Gastric cancer](#)
- 05214 [Glioma](#)
- 05221 [Acute myeloid leukemia](#)
- 05220 [Chronic myeloid leukemia](#)
- 05217 [Basal cell carcinoma](#)
- 05218 [Melanoma](#)
- 05211 [Renal cell carcinoma](#)
- 05215 [Prostate cancer](#)
- 05213 [Endometrial cancer](#)
- 05224 [Breast cancer](#)
- 05222 [Small cell lung cancer](#)
- 05223 [Non-small cell lung cancer](#)
