# Supplementary material for: Dissecting molecular network structures using a network subgraph approach
Source: PeerJ journal article supplement (doi:10.7717/peerj.9556), 2020-08-06
Supplement: Supplemental_Material_S2.pdf [file Supplemental_Material_S2.pdf]

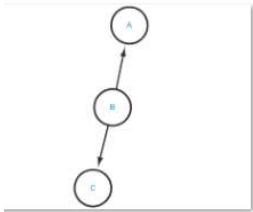

3\_6.png

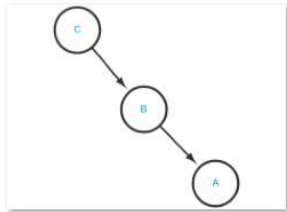

3\_12.png

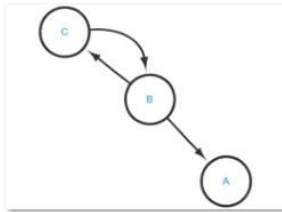

3\_14.png

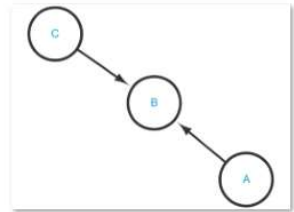

3\_36.png

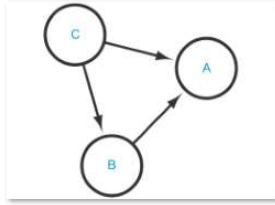

3\_38.png

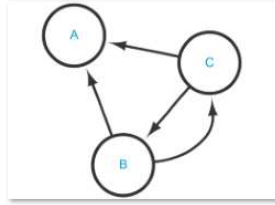

3\_46.png

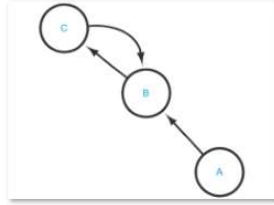

3\_74.png

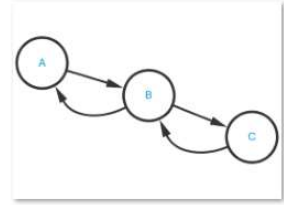

3\_78.png

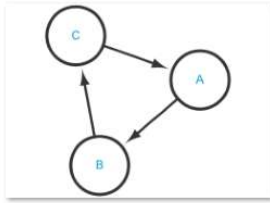

3\_98.png

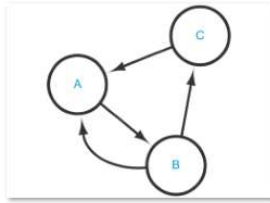

3\_102.png

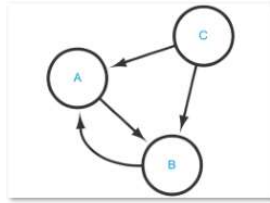

3\_108.png

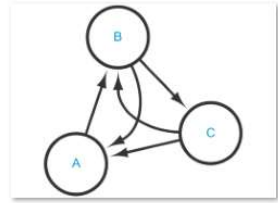

3\_110.png

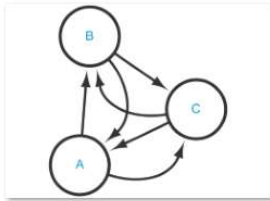

3\_238.png

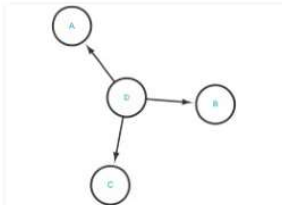

4\_14.png

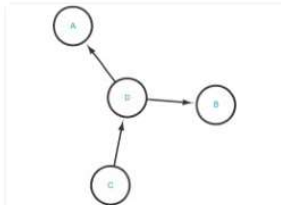

4\_28.png

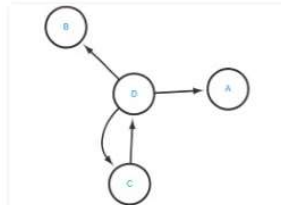

4\_30.png

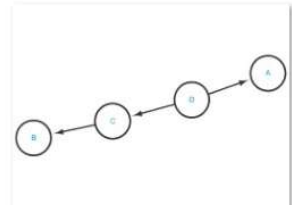

4\_74.png

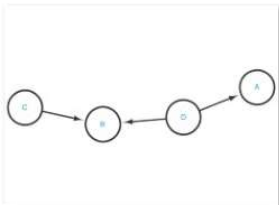

4\_76.png

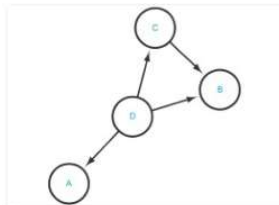

4\_78.png

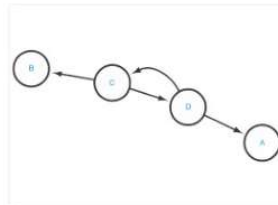

4\_90.png

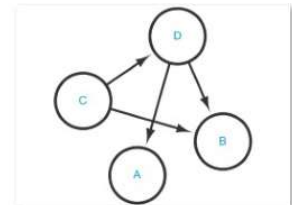

4\_92.png

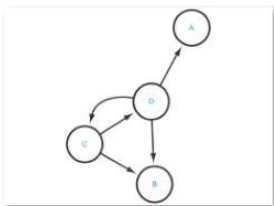

4\_94.png

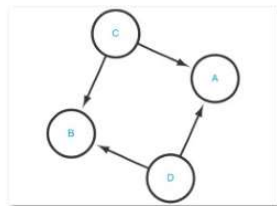

4\_204.png

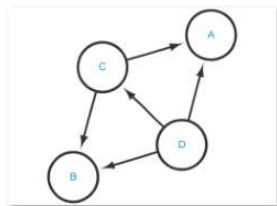

4\_206.png

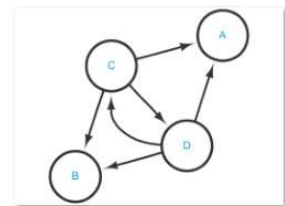

4\_222.png

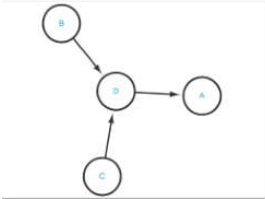

4\_280.png

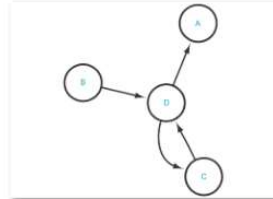

4\_282.png

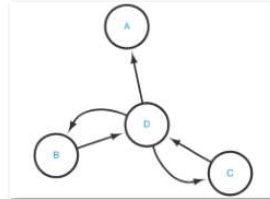

4\_286.png

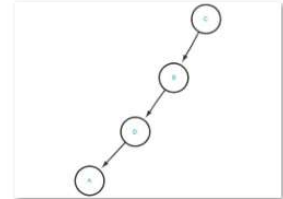

4\_328.png

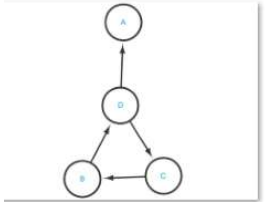

4\_330.png

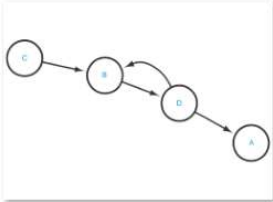

4\_332.png

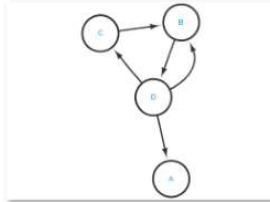

4\_334.png

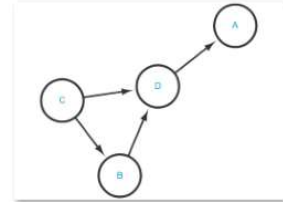

4\_344.png

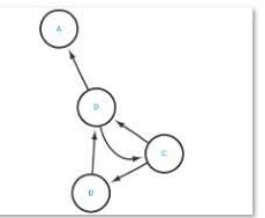

4\_346.png

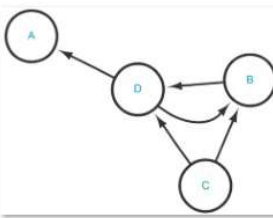

4\_348.png

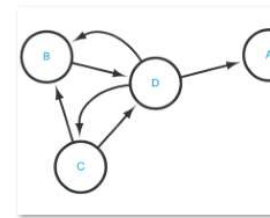

4\_350.png

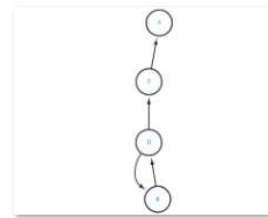

4\_390.png

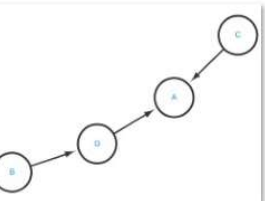

4\_392.png

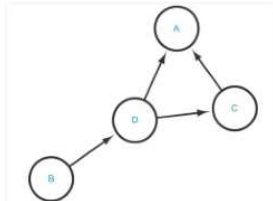

4\_394.png

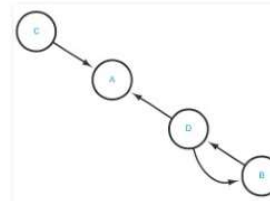

4\_396.png

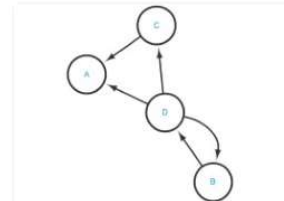

4\_398.png

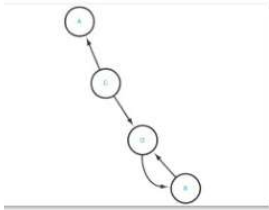

4\_404.png

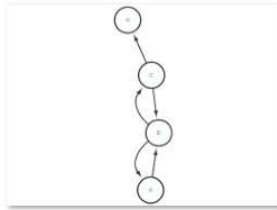

4\_406.png

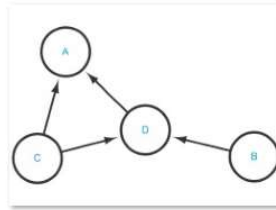

4\_408.png

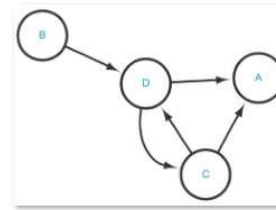

4\_410.png

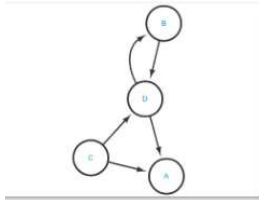

4\_412.png

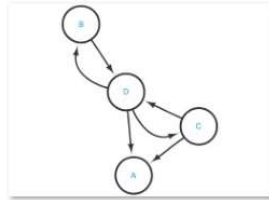

4\_414.png

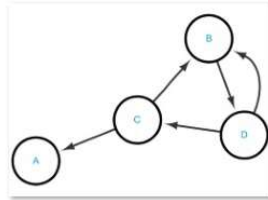

4\_454.png

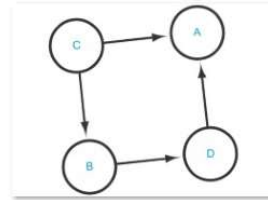

4\_456.png

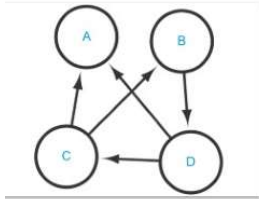

4\_458.png

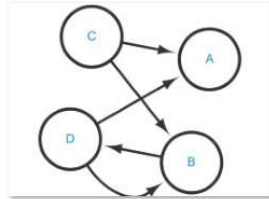

4\_460.png

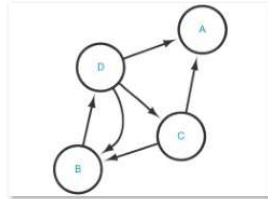

4\_462.png

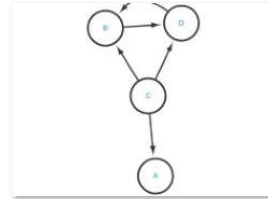

4\_468.png

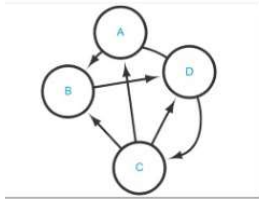

4\_470.png

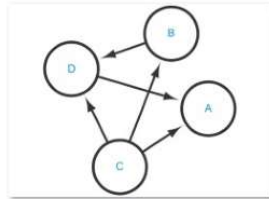

4\_472.png

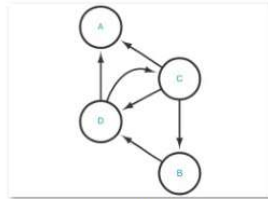

4\_474.png

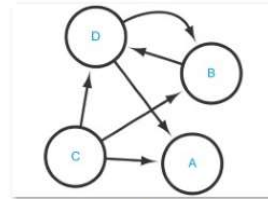

4\_476.png

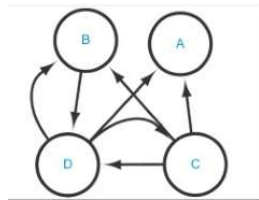

4\_478.png

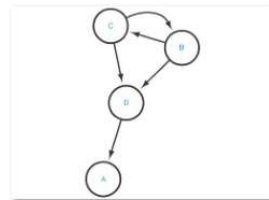

4\_856.png

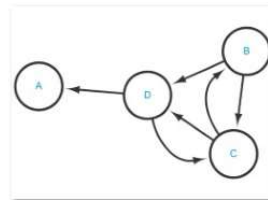

4\_858.png

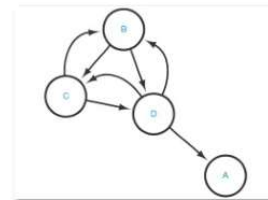

4\_862.png

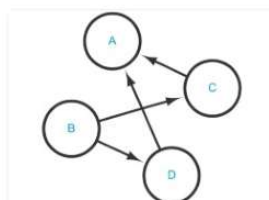

4\_904.png

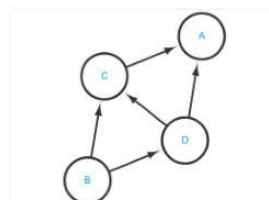

4\_906.png

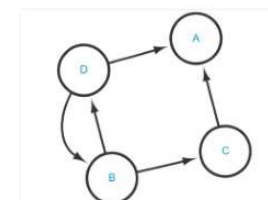

4\_908.png

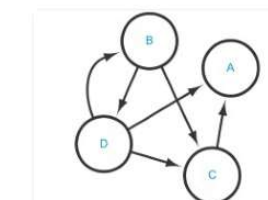

4\_910.png

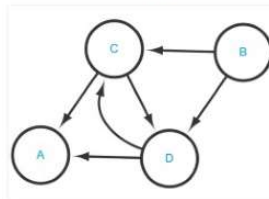

4\_922.png

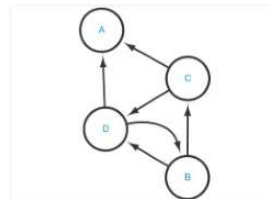

4\_924.png

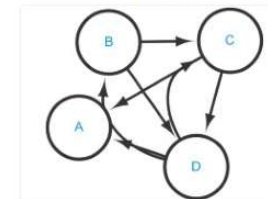

4\_926.png

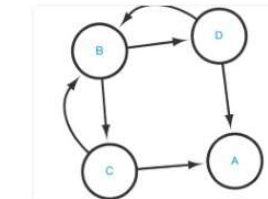

4\_972.png

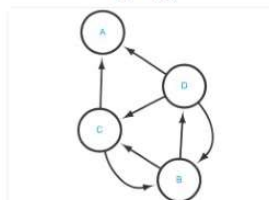

4\_974.png

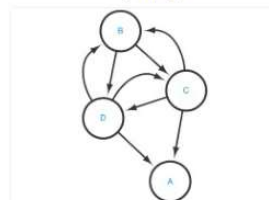

4\_990.png

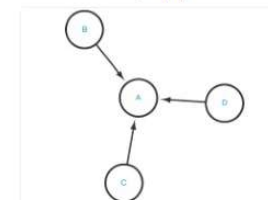

4\_2184.png

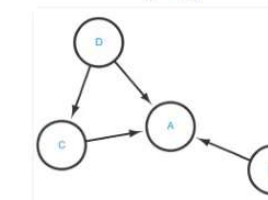

4\_2186.png

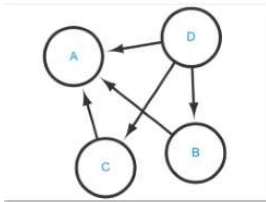

4\_2190.png

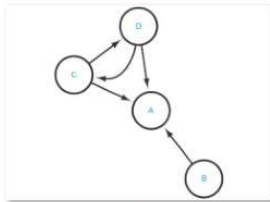

4\_2202.png

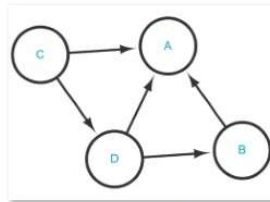

4\_2204.png

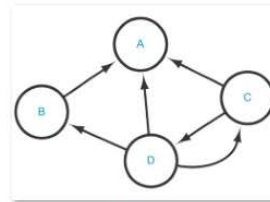

4\_2206.png

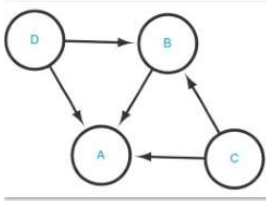

4\_2252.png

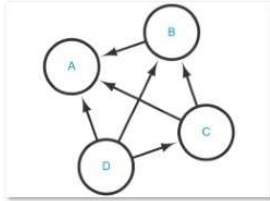

4\_2254.png

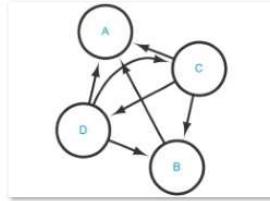

4\_2270.png

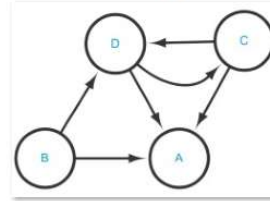

4\_2458.png

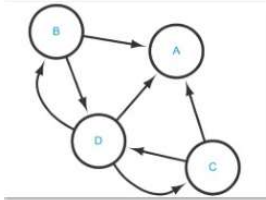

4\_2462.png

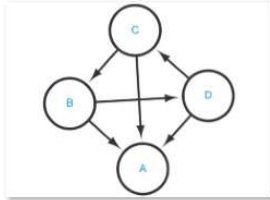

4\_2506.png

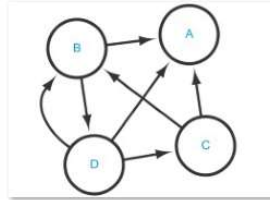

4\_2510.png

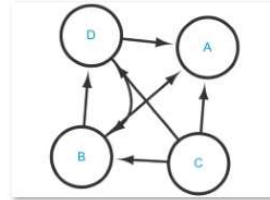

4\_2524.png

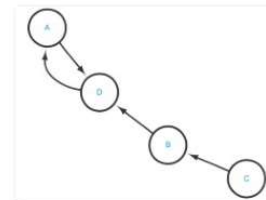

4\_4424.png

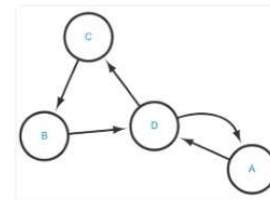

4\_4426.png

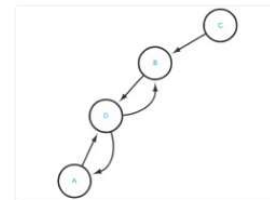

4\_4428.png

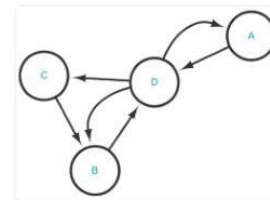

4\_4430.png

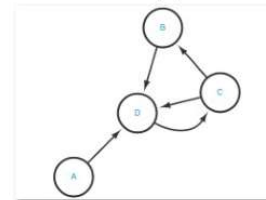

4\_4434.png

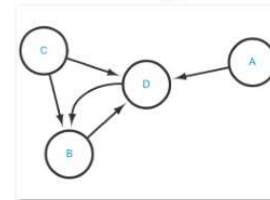

4\_4436.png

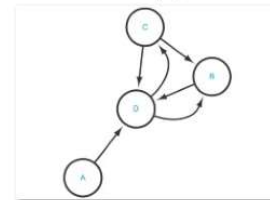

4\_4438.png

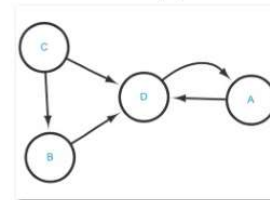

4\_4440.png

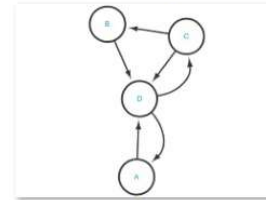

4\_4442.png

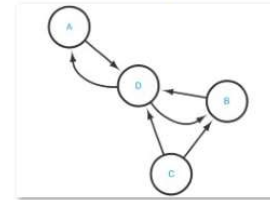

4\_4444.png

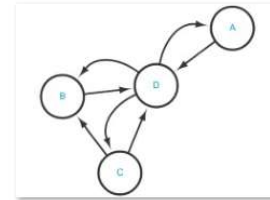

4\_4446.png

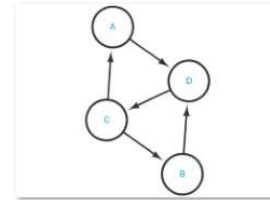

4\_4546.png





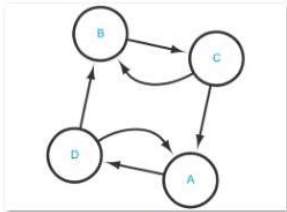

4\_4812.png

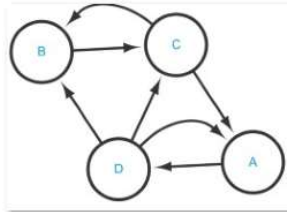

4\_4814.png

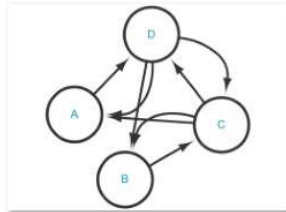

4\_4830.png

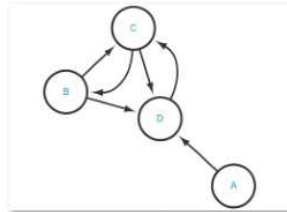

4\_4946.png

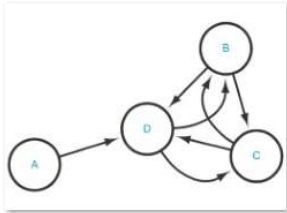

4\_4950.png

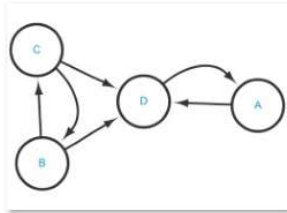

4\_4952.png

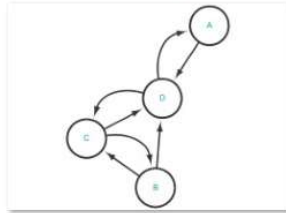

4\_4954.png

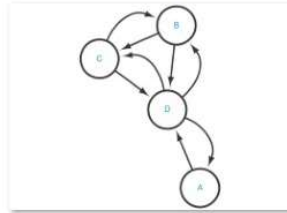

4\_4958.png

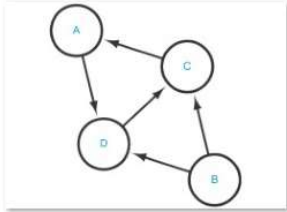

4\_4994.png

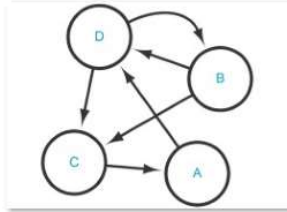

4\_4998.png

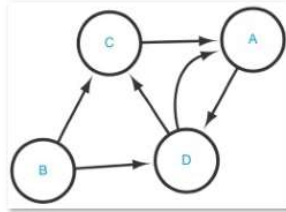

4\_5002.png

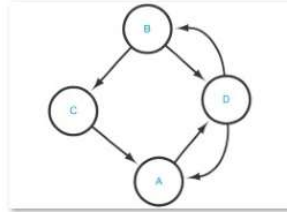

4\_5004.png

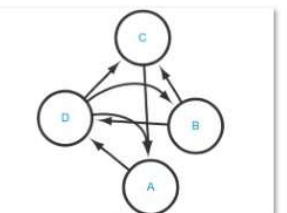

4\_5006.png

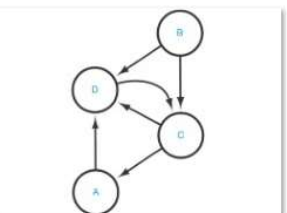

4\_5010.png

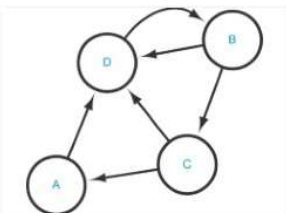

4\_5012.png

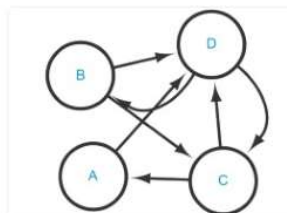

4\_5014.png

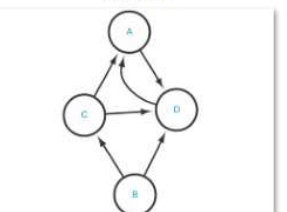

4\_5016.png

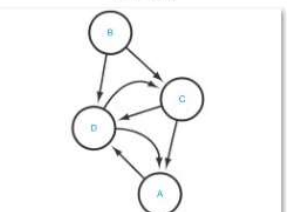

4\_5018.png

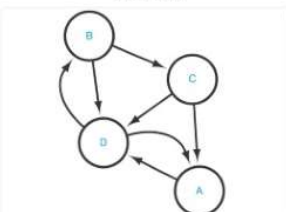

4\_5020.png

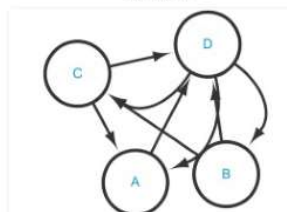

4\_5022.png

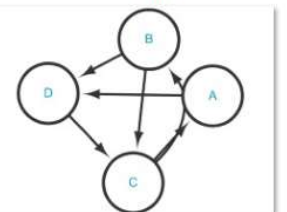

4\_5058.png

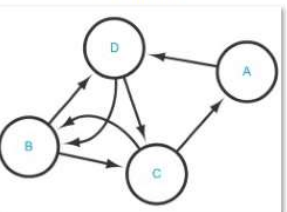

4\_5062.png

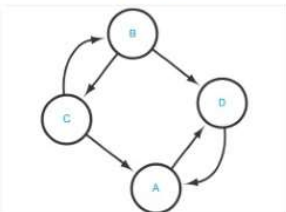

4\_5064.png

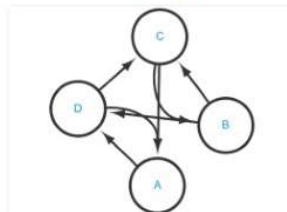

4\_5066.png

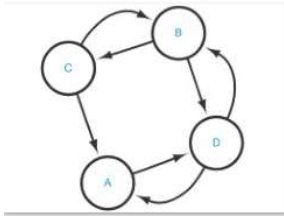

4\_5068.png

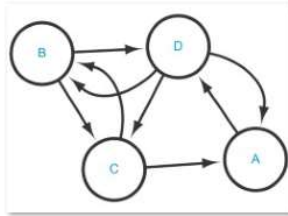

4\_5070.png

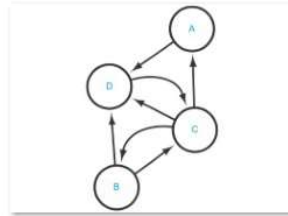

4\_5074.png

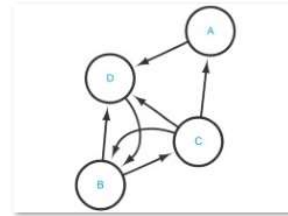

4\_5076.png

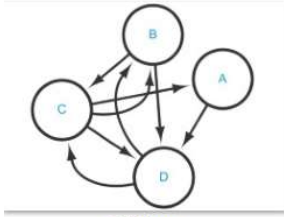

4\_5078.png

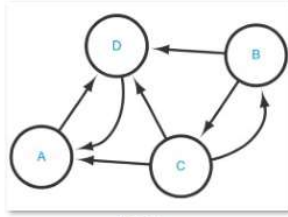

4\_5080.png

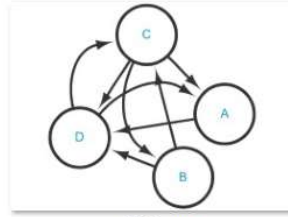

4\_5082.png

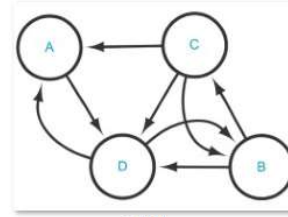

4\_5084.png

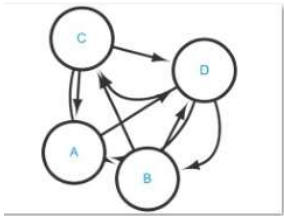

4\_5086.png

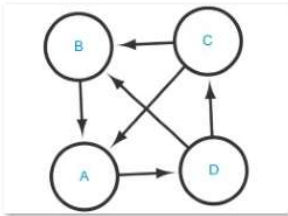

4\_6342.png

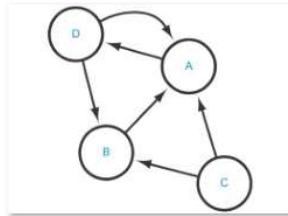

4\_6348.png

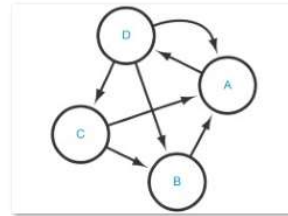

4\_6350.png

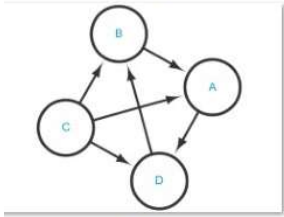

4\_6356.png

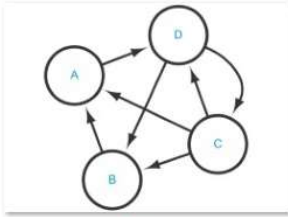

4\_6358.png

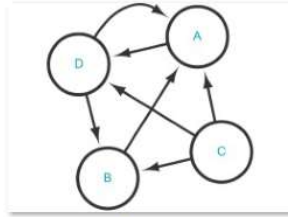

4\_6364.png

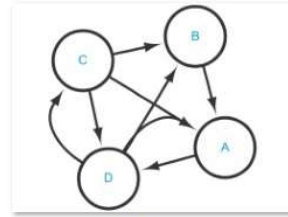

4\_6366.png

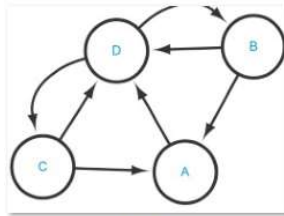

4\_6550.png

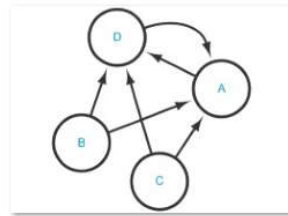

4\_6552.png

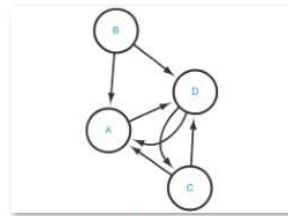

4\_6554.png

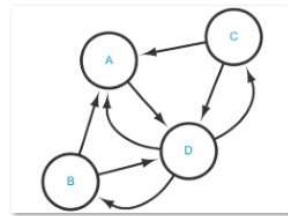

4\_6558.png

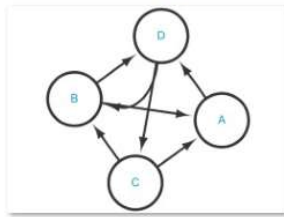

4\_6598.png

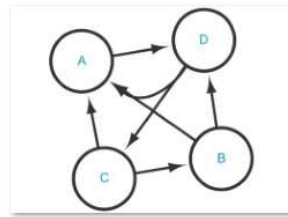

4\_6602.png

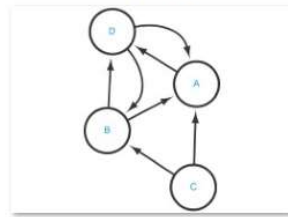

4\_6604.png

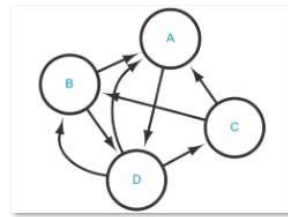

4\_6606.png





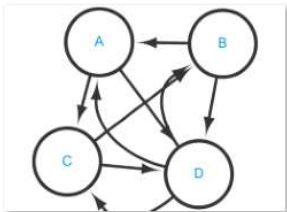

4\_14686.png

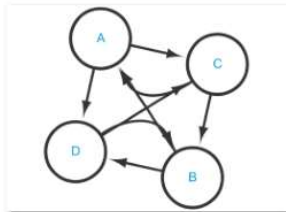

4\_14790.png

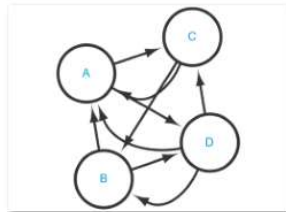

4\_14798.png

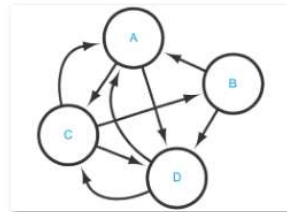

4\_14810.png

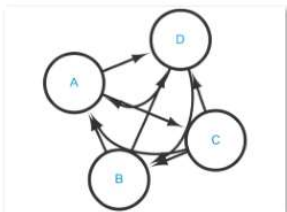

4\_14812.png

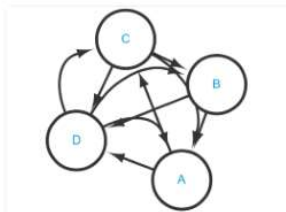

4\_14814.png

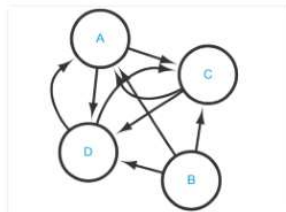

4\_15258.png

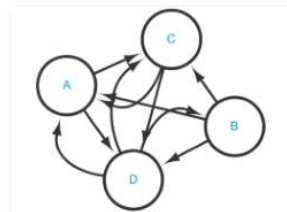

4\_15262.png

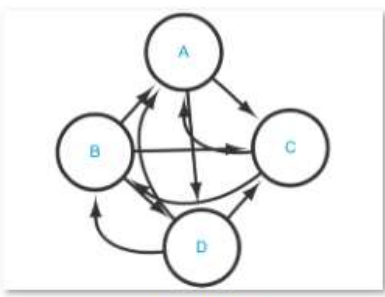

4\_15310.png

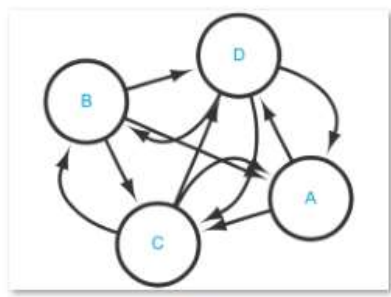

4\_15326.png

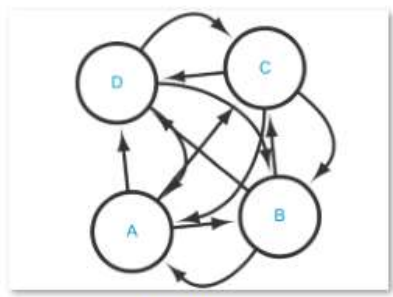

4\_31710.png
